# Supplementary material
Source: publisher figshare collection journal article supplement (https://acs.figshare.com/ndownloader/files/4064713)
Supplement: Supplementary file 1 [file 4064713]

 
data_tp4fmi 
  
_audit_creation_method            SHELXL-97 
_chemical_name_systematic 
; 
 ?
; 
_chemical_name_common             ? 
_chemical_melting_point           ? 
_chemical_formula_moiety          
 'C17 H15 N O2' 
_chemical_formula_sum          
 'C17 H15 N O2' 
_chemical_formula_weight          265.30 
  
loop_ 
 _atom_type_symbol 
 _atom_type_description 
 _atom_type_scat_dispersion_real 
 _atom_type_scat_dispersion_imag 
 _atom_type_scat_source 
 'C'  'C'   0.0181   0.0091 
 'International Tables Vol C Tables 4.2.6.8 and 6.1.1.4' 
 'H'  'H'   0.0000   0.0000 
 'International Tables Vol C Tables 4.2.6.8 and 6.1.1.4' 
 'N'  'N'   0.0311   0.0180 
 'International Tables Vol C Tables 4.2.6.8 and 6.1.1.4' 
 'O'  'O'   0.0492   0.0322 
 'International Tables Vol C Tables 4.2.6.8 and 6.1.1.4' 
  
_symmetry_cell_setting            Monoclinic 
_symmetry_space_group_name_H-M    'P 21/c' 
_symmetry_space_group_name_Hall   '-P 2ybc'
  
loop_ 
 _symmetry_equiv_pos_as_xyz 
 'x, y, z' 
 '-x, y+1/2, -z+1/2' 
 '-x, -y, -z' 
 'x, -y-1/2, z-1/2' 
  
_cell_length_a                    7.3950(4) 
_cell_length_b                    11.2941(6) 
_cell_length_c                    15.9223(9) 
_cell_angle_alpha                 90.00 
_cell_angle_beta                  98.801(2) 
_cell_angle_gamma                 90.00 
_cell_volume                      1314.17(12) 
_cell_formula_units_Z             4 
_cell_measurement_temperature     90(2) 
_cell_measurement_reflns_used     9911 
_cell_measurement_theta_min       7.62 
_cell_measurement_theta_max       72.40 
  
_exptl_crystal_description        'Irregular Block?' 
_exptl_crystal_colour             Colorless 
_exptl_crystal_size_max           0.75 
_exptl_crystal_size_mid           0.66 
_exptl_crystal_size_min           0.38 
_exptl_crystal_density_meas       ? 
_exptl_crystal_density_diffrn     1.341 
_exptl_crystal_density_method     'not measured' 
_exptl_crystal_F_000              560 
_exptl_absorpt_coefficient_mu     0.706 
_exptl_absorpt_correction_type    Multi-scan 
_exptl_absorpt_correction_T_min   0.6199 
_exptl_absorpt_correction_T_max   0.7752 
_exptl_absorpt_process_details    'SADABS 2012/1 (Sheldrick, 2012)' 
  
_exptl_special_details 
; 
 ? 
; 
  
_diffrn_ambient_temperature       90(2) 
_diffrn_radiation_wavelength      1.54178 
_diffrn_radiation_type            CuK\a 
_diffrn_radiation_source          'fine-focus sealed tube' 
_diffrn_radiation_monochromator   graphite 
_diffrn_measurement_device_type   'Bruker APEX-II CCD' 
_diffrn_measurement_method        '\f and \w scans' 
_diffrn_detector_area_resol_mean  ? 
_diffrn_reflns_number             6070 
_diffrn_reflns_av_R_equivalents   0.0273 
_diffrn_reflns_av_sigmaI/netI     0.0305 
_diffrn_reflns_limit_h_min        -8 
_diffrn_reflns_limit_h_max        8 
_diffrn_reflns_limit_k_min        -13 
_diffrn_reflns_limit_k_max        13 
_diffrn_reflns_limit_l_min        -15 
_diffrn_reflns_limit_l_max        18 
_diffrn_reflns_theta_min          7.62 
_diffrn_reflns_theta_max          68.22 
_reflns_number_total              2354 
_reflns_number_gt                 2309 
_reflns_threshold_expression      >2sigma(I) 
  
_computing_data_collection        'Apex2 (2012.2-0) (Bruker, 2012)' 
_computing_cell_refinement        'SAINT (8.27b) (Bruker, 2012)' 
_computing_data_reduction         'SAINT (8.27b) (Bruker, 2012)' 
_computing_structure_solution     'SHELXS-97 (Sheldrick, 2008)' 
_computing_structure_refinement   'SHELXL-97 (Sheldrick, 2008)' 
_computing_molecular_graphics     'Bruker SHELXTL' 
_computing_publication_material   'Bruker SHELXTL' 
  
_refine_special_details 
; 
 Refinement of F^2^ against ALL reflections.  The weighted R-factor wR and 
 goodness of fit S are based on F^2^, conventional R-factors R are based 
 on F, with F set to zero for negative F^2^. The threshold expression of 
 F^2^ > 2sigma(F^2^) is used only for calculating R-factors(gt) etc. and is 
 not relevant to the choice of reflections for refinement.  R-factors based 
 on F^2^ are statistically about twice as large as those based on F, and R- 
 factors based on ALL data will be even larger. 
; 
  
_refine_ls_structure_factor_coef  Fsqd 
_refine_ls_matrix_type            full 
_refine_ls_weighting_scheme       calc 
_refine_ls_weighting_details 
 'calc w=1/[\s^2^(Fo^2^)+(0.0418P)^2^+0.4592P] where P=(Fo^2^+2Fc^2^)/3' 
_atom_sites_solution_primary      direct 
_atom_sites_solution_secondary    difmap 
_atom_sites_solution_hydrogens    geom 
_refine_ls_hydrogen_treatment     refall 
_refine_ls_extinction_method      none 
_refine_ls_extinction_coef        ? 
_refine_ls_number_reflns          2354 
_refine_ls_number_parameters      241 
_refine_ls_number_restraints      0 
_refine_ls_R_factor_all           0.0353 
_refine_ls_R_factor_gt            0.0348 
_refine_ls_wR_factor_ref          0.0887 
_refine_ls_wR_factor_gt           0.0883 
_refine_ls_goodness_of_fit_ref    1.078 
_refine_ls_restrained_S_all       1.078 
_refine_ls_shift/su_max           0.000 
_refine_ls_shift/su_mean          0.000 
  
loop_ 
 _atom_site_label 
 _atom_site_type_symbol 
 _atom_site_fract_x 
 _atom_site_fract_y 
 _atom_site_fract_z 
 _atom_site_U_iso_or_equiv 
 _atom_site_adp_type 
 _atom_site_occupancy 
 _atom_site_symmetry_multiplicity 
 _atom_site_calc_flag 
 _atom_site_refinement_flags 
 _atom_site_disorder_assembly 
 _atom_site_disorder_group 
C1 C 0.77011(14) 0.64900(10) 0.41891(7) 0.0183(2) Uani 1 1 d . . . 
H1 H 0.507(2) 0.5994(12) 0.3928(10) 0.026(4) Uiso 1 1 d . . . 
N1 N 0.61936(13) 0.58701(8) 0.38397(6) 0.0188(2) Uani 1 1 d . . . 
O1 O 1.23718(11) 0.57411(7) 0.38982(5) 0.0236(2) Uani 1 1 d . . . 
C2 C 0.92520(15) 0.59574(10) 0.39532(7) 0.0186(3) Uani 1 1 d . . . 
O2 O 0.79226(11) 0.89207(7) 0.37327(5) 0.0235(2) Uani 1 1 d . . . 
C3 C 0.86129(15) 0.49469(10) 0.34300(7) 0.0184(2) Uani 1 1 d . . . 
C4 C 0.94582(16) 0.40383(10) 0.30311(7) 0.0212(3) Uani 1 1 d . . . 
H4 H 1.0783(19) 0.4025(11) 0.3071(9) 0.017(3) Uiso 1 1 d . . . 
C5 C 0.83887(17) 0.31662(10) 0.25938(8) 0.0239(3) Uani 1 1 d . . . 
H5 H 0.8967(19) 0.2513(13) 0.2315(9) 0.026(3) Uiso 1 1 d . . . 
C6 C 0.64786(17) 0.31791(11) 0.25356(8) 0.0247(3) Uani 1 1 d . . . 
H6 H 0.577(2) 0.2557(14) 0.2221(10) 0.029(4) Uiso 1 1 d . . . 
C7 C 0.56059(16) 0.40589(10) 0.29258(7) 0.0219(3) Uani 1 1 d . . . 
H7 H 0.427(2) 0.4084(12) 0.2894(9) 0.022(3) Uiso 1 1 d . . . 
C8 C 0.66981(15) 0.49231(10) 0.33752(7) 0.0187(2) Uani 1 1 d . . . 
C9 C 0.74498(14) 0.74924(10) 0.47652(7) 0.0191(3) Uani 1 1 d . . . 
C10 C 0.75497(14) 0.86885(10) 0.45315(7) 0.0200(3) Uani 1 1 d . . . 
C11 C 0.72835(16) 0.95699(10) 0.51098(8) 0.0228(3) Uani 1 1 d . . . 
H11 H 0.7316(19) 1.0389(13) 0.4933(9) 0.025(3) Uiso 1 1 d . . . 
C12 C 0.69625(16) 0.92805(11) 0.59218(8) 0.0242(3) Uani 1 1 d . . . 
H12 H 0.6795(19) 0.9906(14) 0.6307(10) 0.025(3) Uiso 1 1 d . . . 
C13 C 0.68524(17) 0.81083(11) 0.61584(8) 0.0257(3) Uani 1 1 d . . . 
H13 H 0.663(2) 0.7910(14) 0.6744(11) 0.033(4) Uiso 1 1 d . . . 
C14 C 0.70695(16) 0.72235(11) 0.55744(8) 0.0229(3) Uani 1 1 d . . . 
H14 H 0.6975(19) 0.6410(14) 0.5739(9) 0.025(3) Uiso 1 1 d . . . 
C15 C 0.80202(18) 1.01507(11) 0.35096(9) 0.0257(3) Uani 1 1 d . . . 
H15A H 0.831(2) 1.0163(13) 0.2922(10) 0.030(4) Uiso 1 1 d . . . 
H15B H 0.684(2) 1.0561(13) 0.3526(9) 0.025(3) Uiso 1 1 d . . . 
H15C H 0.899(2) 1.0565(13) 0.3885(10) 0.029(4) Uiso 1 1 d . . . 
C16 C 1.11602(15) 0.62842(10) 0.41951(7) 0.0191(3) Uani 1 1 d . . . 
C17 C 1.16740(17) 0.72897(11) 0.48000(9) 0.0257(3) Uani 1 1 d . . . 
H17A H 1.111(2) 0.8022(15) 0.4536(11) 0.040(4) Uiso 1 1 d . . . 
H17B H 1.117(2) 0.7156(16) 0.5334(12) 0.048(5) Uiso 1 1 d . . . 
H17C H 1.301(2) 0.7369(14) 0.4905(10) 0.034(4) Uiso 1 1 d . . . 
  
loop_ 
 _atom_site_aniso_label 
 _atom_site_aniso_U_11 
 _atom_site_aniso_U_22 
 _atom_site_aniso_U_33 
 _atom_site_aniso_U_23 
 _atom_site_aniso_U_13 
 _atom_site_aniso_U_12 
C1 0.0176(5) 0.0184(5) 0.0186(6) 0.0022(4) 0.0018(4) -0.0005(4) 
N1 0.0148(5) 0.0201(5) 0.0215(5) -0.0004(4) 0.0032(4) 0.0001(4) 
O1 0.0179(4) 0.0237(4) 0.0297(5) -0.0018(3) 0.0057(3) 0.0007(3) 
C2 0.0194(6) 0.0177(5) 0.0187(6) 0.0013(4) 0.0032(4) 0.0009(4) 
O2 0.0295(5) 0.0199(4) 0.0220(4) 0.0005(3) 0.0068(3) 0.0001(3) 
C3 0.0199(5) 0.0191(5) 0.0163(6) 0.0027(4) 0.0031(4) -0.0007(4) 
C4 0.0216(6) 0.0226(6) 0.0202(6) 0.0013(4) 0.0059(4) 0.0010(4) 
C5 0.0309(6) 0.0218(6) 0.0201(6) -0.0017(4) 0.0074(5) 0.0006(5) 
C6 0.0305(6) 0.0237(6) 0.0196(6) -0.0033(5) 0.0026(5) -0.0067(5) 
C7 0.0206(6) 0.0248(6) 0.0202(6) 0.0012(4) 0.0027(4) -0.0038(4) 
C8 0.0205(6) 0.0194(5) 0.0164(6) 0.0017(4) 0.0032(4) 0.0004(4) 
C9 0.0136(5) 0.0213(6) 0.0220(6) -0.0012(4) 0.0016(4) 0.0015(4) 
C10 0.0151(5) 0.0232(6) 0.0216(6) 0.0001(4) 0.0023(4) 0.0004(4) 
C11 0.0213(6) 0.0195(6) 0.0273(6) -0.0015(5) 0.0032(5) 0.0002(4) 
C12 0.0225(6) 0.0251(6) 0.0255(7) -0.0065(5) 0.0052(5) 0.0007(5) 
C13 0.0269(6) 0.0277(6) 0.0234(6) -0.0014(5) 0.0069(5) -0.0004(5) 
C14 0.0219(6) 0.0221(6) 0.0248(6) 0.0007(5) 0.0041(5) 0.0000(4) 
C15 0.0299(7) 0.0206(6) 0.0275(7) 0.0018(5) 0.0070(5) -0.0007(5) 
C16 0.0191(6) 0.0183(5) 0.0200(6) 0.0038(4) 0.0037(4) 0.0016(4) 
C17 0.0178(6) 0.0265(6) 0.0322(7) -0.0058(5) 0.0016(5) -0.0009(5) 
  
_geom_special_details 
; 
 All esds (except the esd in the dihedral angle between two l.s. planes) 
 are estimated using the full covariance matrix.  The cell esds are taken 
 into account individually in the estimation of esds in distances, angles 
 and torsion angles; correlations between esds in cell parameters are only 
 used when they are defined by crystal symmetry.  An approximate (isotropic) 
 treatment of cell esds is used for estimating esds involving l.s. planes. 
; 
  
loop_ 
 _geom_bond_atom_site_label_1 
 _geom_bond_atom_site_label_2 
 _geom_bond_distance 
 _geom_bond_site_symmetry_2 
 _geom_bond_publ_flag 
C1 N1 1.3612(15) . ? 
C1 C2 1.3965(16) . ? 
C1 C9 1.4866(16) . ? 
N1 C8 1.3836(15) . ? 
N1 H1 0.875(16) . ? 
O1 C16 1.2378(14) . ? 
C2 C3 1.4490(16) . ? 
C2 C16 1.4524(16) . ? 
O2 C10 1.3674(15) . ? 
O2 C15 1.4384(14) . ? 
C3 C4 1.4030(16) . ? 
C3 C8 1.4055(16) . ? 
C4 C5 1.3827(17) . ? 
C4 H4 0.972(14) . ? 
C5 C6 1.4015(18) . ? 
C5 H5 0.991(15) . ? 
C6 C7 1.3829(17) . ? 
C6 H6 0.970(16) . ? 
C7 C8 1.3929(16) . ? 
C7 H7 0.982(14) . ? 
C9 C14 1.3936(17) . ? 
C9 C10 1.4061(16) . ? 
C10 C11 1.3904(17) . ? 
C11 C12 1.3887(18) . ? 
C11 H11 0.968(15) . ? 
C12 C13 1.3822(18) . ? 
C12 H12 0.957(16) . ? 
C13 C14 1.3909(17) . ? 
C13 H13 0.998(17) . ? 
C14 H14 0.961(16) . ? 
C15 H15A 0.990(16) . ? 
C15 H15B 0.995(15) . ? 
C15 H15C 0.977(16) . ? 
C16 C17 1.4999(17) . ? 
C17 H17A 0.990(18) . ? 
C17 H17B 0.989(19) . ? 
C17 H17C 0.978(16) . ? 
  
loop_ 
 _geom_angle_atom_site_label_1 
 _geom_angle_atom_site_label_2 
 _geom_angle_atom_site_label_3 
 _geom_angle 
 _geom_angle_site_symmetry_1 
 _geom_angle_site_symmetry_3 
 _geom_angle_publ_flag 
N1 C1 C2 108.87(10) . . ? 
N1 C1 C9 118.17(10) . . ? 
C2 C1 C9 132.79(10) . . ? 
C1 N1 C8 110.19(9) . . ? 
C1 N1 H1 126.2(10) . . ? 
C8 N1 H1 123.4(10) . . ? 
C1 C2 C3 106.55(10) . . ? 
C1 C2 C16 128.60(11) . . ? 
C3 C2 C16 124.81(10) . . ? 
C10 O2 C15 116.09(9) . . ? 
C4 C3 C8 118.19(10) . . ? 
C4 C3 C2 135.04(11) . . ? 
C8 C3 C2 106.71(10) . . ? 
C5 C4 C3 119.26(11) . . ? 
C5 C4 H4 121.0(8) . . ? 
C3 C4 H4 119.8(8) . . ? 
C4 C5 C6 121.26(11) . . ? 
C4 C5 H5 120.2(8) . . ? 
C6 C5 H5 118.5(8) . . ? 
C7 C6 C5 120.85(11) . . ? 
C7 C6 H6 119.9(9) . . ? 
C5 C6 H6 119.2(9) . . ? 
C6 C7 C8 117.42(11) . . ? 
C6 C7 H7 122.2(8) . . ? 
C8 C7 H7 120.4(8) . . ? 
N1 C8 C7 129.32(10) . . ? 
N1 C8 C3 107.67(10) . . ? 
C7 C8 C3 123.01(10) . . ? 
C14 C9 C10 118.71(11) . . ? 
C14 C9 C1 117.80(10) . . ? 
C10 C9 C1 123.49(10) . . ? 
O2 C10 C11 123.22(11) . . ? 
O2 C10 C9 117.17(10) . . ? 
C11 C10 C9 119.60(11) . . ? 
C12 C11 C10 120.65(11) . . ? 
C12 C11 H11 120.7(9) . . ? 
C10 C11 H11 118.6(9) . . ? 
C13 C12 C11 120.32(11) . . ? 
C13 C12 H12 120.9(9) . . ? 
C11 C12 H12 118.7(9) . . ? 
C12 C13 C14 119.23(12) . . ? 
C12 C13 H13 119.6(9) . . ? 
C14 C13 H13 121.1(9) . . ? 
C13 C14 C9 121.44(11) . . ? 
C13 C14 H14 118.9(9) . . ? 
C9 C14 H14 119.6(9) . . ? 
O2 C15 H15A 105.8(9) . . ? 
O2 C15 H15B 111.5(8) . . ? 
H15A C15 H15B 109.5(12) . . ? 
O2 C15 H15C 111.7(9) . . ? 
H15A C15 H15C 109.3(12) . . ? 
H15B C15 H15C 109.0(12) . . ? 
O1 C16 C2 120.23(11) . . ? 
O1 C16 C17 119.56(10) . . ? 
C2 C16 C17 120.20(10) . . ? 
C16 C17 H17A 108.1(10) . . ? 
C16 C17 H17B 110.2(11) . . ? 
H17A C17 H17B 107.7(14) . . ? 
C16 C17 H17C 109.2(9) . . ? 
H17A C17 H17C 110.1(13) . . ? 
H17B C17 H17C 111.5(14) . . ? 
  
loop_ 
 _geom_torsion_atom_site_label_1 
 _geom_torsion_atom_site_label_2 
 _geom_torsion_atom_site_label_3 
 _geom_torsion_atom_site_label_4 
 _geom_torsion 
 _geom_torsion_site_symmetry_1 
 _geom_torsion_site_symmetry_2 
 _geom_torsion_site_symmetry_3 
 _geom_torsion_site_symmetry_4 
 _geom_torsion_publ_flag 
C2 C1 N1 C8 0.34(13) . . . . ? 
C9 C1 N1 C8 -175.61(9) . . . . ? 
N1 C1 C2 C3 -0.28(12) . . . . ? 
C9 C1 C2 C3 174.85(11) . . . . ? 
N1 C1 C2 C16 -177.89(11) . . . . ? 
C9 C1 C2 C16 -2.8(2) . . . . ? 
C1 C2 C3 C4 -176.89(12) . . . . ? 
C16 C2 C3 C4 0.8(2) . . . . ? 
C1 C2 C3 C8 0.13(12) . . . . ? 
C16 C2 C3 C8 177.85(10) . . . . ? 
C8 C3 C4 C5 0.73(16) . . . . ? 
C2 C3 C4 C5 177.48(12) . . . . ? 
C3 C4 C5 C6 0.56(18) . . . . ? 
C4 C5 C6 C7 -0.94(18) . . . . ? 
C5 C6 C7 C8 -0.02(17) . . . . ? 
C1 N1 C8 C7 179.12(11) . . . . ? 
C1 N1 C8 C3 -0.25(12) . . . . ? 
C6 C7 C8 N1 -177.91(11) . . . . ? 
C6 C7 C8 C3 1.38(17) . . . . ? 
C4 C3 C8 N1 177.68(10) . . . . ? 
C2 C3 C8 N1 0.07(12) . . . . ? 
C4 C3 C8 C7 -1.74(17) . . . . ? 
C2 C3 C8 C7 -179.35(10) . . . . ? 
N1 C1 C9 C14 73.39(14) . . . . ? 
C2 C1 C9 C14 -101.39(15) . . . . ? 
N1 C1 C9 C10 -105.65(13) . . . . ? 
C2 C1 C9 C10 79.57(16) . . . . ? 
C15 O2 C10 C11 -0.33(16) . . . . ? 
C15 O2 C10 C9 -179.91(10) . . . . ? 
C14 C9 C10 O2 -179.90(10) . . . . ? 
C1 C9 C10 O2 -0.87(16) . . . . ? 
C14 C9 C10 C11 0.50(16) . . . . ? 
C1 C9 C10 C11 179.53(10) . . . . ? 
O2 C10 C11 C12 -178.06(10) . . . . ? 
C9 C10 C11 C12 1.51(17) . . . . ? 
C10 C11 C12 C13 -1.82(18) . . . . ? 
C11 C12 C13 C14 0.10(18) . . . . ? 
C12 C13 C14 C9 1.96(18) . . . . ? 
C10 C9 C14 C13 -2.24(17) . . . . ? 
C1 C9 C14 C13 178.67(10) . . . . ? 
C1 C2 C16 O1 -177.04(11) . . . . ? 
C3 C2 C16 O1 5.76(17) . . . . ? 
C1 C2 C16 C17 2.38(18) . . . . ? 
C3 C2 C16 C17 -174.83(11) . . . . ? 
  
loop_ 
 _geom_hbond_atom_site_label_D 
 _geom_hbond_atom_site_label_H 
 _geom_hbond_atom_site_label_A 
 _geom_hbond_distance_DH 
 _geom_hbond_distance_HA 
 _geom_hbond_distance_DA 
 _geom_hbond_angle_DHA 
 _geom_hbond_site_symmetry_A 
N1 H1 O1  0.875(16) 2.009(16) 2.8458(13) 159.6(13) 1_455 
  
_diffrn_measured_fraction_theta_max    0.980 
_diffrn_reflns_theta_full              68.22 
_diffrn_measured_fraction_theta_full   0.980 
_refine_diff_density_max    0.287 
_refine_diff_density_min   -0.213 
_refine_diff_density_rms    0.040 

_iucr_refine_instructions_details
;

TITL TP4Fmi in P2(1)/c  FINAL MERGE-I 21DEC2012
CELL 1.54178   7.3950  11.2941  15.9223  90.000  98.801  90.000
ZERR    4.00   0.0004   0.0006   0.0009   0.000   0.002   0.000
LATT  1
SYMM -X, 0.5+Y, 0.5-Z
SFAC C H N O
UNIT 68 60 4 8
TEMP -183.000
SIZE 0.38 0.664 0.749 ! COLORLESS IRREGULAR BLOCK
OMIT -1   1   2 !   -0.16       2041.73      20.81       0.352       5.17
OMIT  0   2   0 !   -0.16       1398.19      20.34       0.291       5.65
L.S. 9
SHEL 999 0.83
ACTA
BOND $H
FMAP 2
PLAN 20
HTAB N1 O1_$1 ! [ x-1, y, z ]
EQIV $1 x-1, y, z
HTAB
CONF
WPDB -2
TEMP -183.000
REM 1.80 SIGMA EXTI    0.000880
WGHT    0.041800    0.459200
FVAR       0.24448
C1    1    0.770109    0.649000    0.418913    11.00000    0.01765    0.01839 =
         0.01863    0.00216    0.00175   -0.00055
H1    2    0.506964    0.599423    0.392801    11.00000    0.02556
N1    3    0.619363    0.587007    0.383967    11.00000    0.01479    0.02014 =
         0.02149   -0.00038    0.00322    0.00012
O1    4    1.237178    0.574109    0.389823    11.00000    0.01795    0.02372 =
         0.02970   -0.00178    0.00571    0.00066
C2    1    0.925199    0.595741    0.395324    11.00000    0.01937    0.01768 =
         0.01874    0.00132    0.00323    0.00088
O2    4    0.792257    0.892066    0.373268    11.00000    0.02948    0.01992 =
         0.02198    0.00050    0.00684    0.00005
C3    1    0.861286    0.494687    0.342995    11.00000    0.01990    0.01908 =
         0.01634    0.00269    0.00312   -0.00074
C4    1    0.945815    0.403830    0.303112    11.00000    0.02159    0.02255 =
         0.02017    0.00125    0.00590    0.00102
H4    2    1.078259    0.402497    0.307064    11.00000    0.01746
C5    1    0.838875    0.316617    0.259380    11.00000    0.03092    0.02180 =
         0.02006   -0.00173    0.00745    0.00064
H5    2    0.896725    0.251273    0.231538    11.00000    0.02570
C6    1    0.647860    0.317913    0.253560    11.00000    0.03046    0.02371 =
         0.01963   -0.00330    0.00259   -0.00668
H6    2    0.576717    0.255724    0.222099    11.00000    0.02890
C7    1    0.560588    0.405888    0.292582    11.00000    0.02064    0.02481 =
         0.02021    0.00119    0.00267   -0.00377
H7    2    0.427007    0.408446    0.289399    11.00000    0.02221
C8    1    0.669815    0.492307    0.337521    11.00000    0.02050    0.01940 =
         0.01640    0.00172    0.00320    0.00039
C9    1    0.744984    0.749245    0.476524    11.00000    0.01357    0.02133 =
         0.02203   -0.00123    0.00157    0.00146
C10   1    0.754974    0.868851    0.453146    11.00000    0.01509    0.02322 =
         0.02156    0.00014    0.00232    0.00038
C11   1    0.728348    0.956989    0.510982    11.00000    0.02130    0.01951 =
         0.02735   -0.00152    0.00315    0.00024
H11   2    0.731628    1.038858    0.493289    11.00000    0.02458
C12   1    0.696254    0.928045    0.592181    11.00000    0.02246    0.02513 =
         0.02547   -0.00648    0.00524    0.00067
H12   2    0.679480    0.990637    0.630735    11.00000    0.02466
C13   1    0.685240    0.810831    0.615839    11.00000    0.02690    0.02775 =
         0.02342   -0.00140    0.00686   -0.00040
H13   2    0.662587    0.791031    0.674416    11.00000    0.03251
C14   1    0.706946    0.722349    0.557440    11.00000    0.02192    0.02210 =
         0.02478    0.00071    0.00411    0.00003
H14   2    0.697515    0.640996    0.573911    11.00000    0.02542
C15   1    0.802017    1.015070    0.350961    11.00000    0.02985    0.02062 =
         0.02749    0.00184    0.00705   -0.00073
H15A  2    0.830607    1.016268    0.292203    11.00000    0.02956
H15B  2    0.683572    1.056113    0.352561    11.00000    0.02493
H15C  2    0.898535    1.056458    0.388512    11.00000    0.02852
C16   1    1.116016    0.628419    0.419510    11.00000    0.01906    0.01834 =
         0.02003    0.00378    0.00371    0.00156
C17   1    1.167404    0.728971    0.479997    11.00000    0.01778    0.02650 =
         0.03222   -0.00582    0.00161   -0.00092
H17A  2    1.111104    0.802159    0.453564    11.00000    0.03987
H17B  2    1.117379    0.715650    0.533362    11.00000    0.04781
H17C  2    1.300593    0.736867    0.490475    11.00000    0.03362
HKLF 4
 
REM  TP4Fmi in P2(1)/c  FINAL MERGE-I 21DEC2012
REM R1 =  0.0348 for   2309 Fo > 4sig(Fo)  and  0.0353 for all   2354 data
REM    241 parameters refined using      0 restraints
 
END  
     
WGHT      0.0402      0.4756 
REM Highest difference peak  0.287,  deepest hole -0.213,  1-sigma level  0.040
Q1    1   0.7454  0.8043  0.7126  11.00000  0.05    0.29
Q2    1   0.8545  0.6359  0.4003  11.00000  0.05    0.24
Q3    1   1.0108  0.6025  0.4178  11.00000  0.05    0.24
Q4    1   0.7684  0.4750  0.3479  11.00000  0.05    0.23
Q5    1   0.7669  0.4946  0.3258  11.00000  0.05    0.23
Q6    1   0.9078  0.5444  0.3625  11.00000  0.05    0.20
Q7    1   0.6924  0.8028  0.4545  11.00000  0.05    0.19
Q8    1   0.7702  0.6981  0.4443  11.00000  0.05    0.18
Q9    1   0.7408  0.3426  0.2393  11.00000  0.05    0.17
Q10   1   1.1311  0.6793  0.4516  11.00000  0.05    0.17
Q11   1   0.6960  0.6287  0.4032  11.00000  0.05    0.17
Q12   1   1.3655  0.5912  0.4131  11.00000  0.05    0.16
Q13   1   0.7560  0.8661  0.6138  11.00000  0.05    0.15
Q14   1   0.6733  0.9107  0.4727  11.00000  0.05    0.15
Q15   1   0.7988  0.8057  0.4725  11.00000  0.05    0.15
Q16   1   0.9068  0.4417  0.3374  11.00000  0.05    0.14
Q17   1   0.6181  0.4566  0.3112  11.00000  0.05    0.14
Q18   1   0.8118  0.9214  0.4906  11.00000  0.05    0.14
Q19   1   0.9034  0.4586  0.3181  11.00000  0.05    0.14
Q20   1   1.1778  0.5089  0.3626  11.00000  0.05    0.14


;

_iucr_refine_reflections_details

;

  -4  -2 -15    1.20    0.06
  -3   2 -15   16.74    0.72
   1   3 -15    5.01    0.24
   2   3 -15    0.48    0.06
   3  -8 -14    1.33    0.07
   7  -2 -14    4.65    0.19
  -4  -1 -14    0.17    0.03
  -4   1 -14    0.10    0.03
  -4   2 -14    2.26    0.12
   1   2 -14    3.94    0.19
  -3   3 -14   24.99    1.08
   1   3 -14    7.07    0.33
   2   3 -14   54.69    2.46
  -3   4 -14    0.63    0.06
   0   4 -14    2.50    0.14
   1   4 -14   44.18    1.92
   2   4 -14    1.03    0.08
   3   4 -14    0.38    0.06
   1   5 -14    0.43    0.06
   3  -9 -13    3.58    0.16
  -5  -4 -13    0.04    0.02
  -5  -2 -13   11.98    0.46
  -5  -1 -13    0.44    0.04
  -5   0 -13   -0.01    0.02
  -4   0 -13   -0.01    0.02
  -5   1 -13    0.34    0.04
  -4   2 -13    2.88    0.15
   1   2 -13    3.60    0.20
  -4   3 -13    6.93    0.31
  -3   3 -13    0.07    0.04
   0   3 -13   24.34    0.75
   1   3 -13    3.24    0.13
   2   3 -13   29.96    1.38
  -4   4 -13    4.54    0.21
  -3   4 -13    0.24    0.04
  -1   4 -13    1.35    0.09
   0   4 -13   25.03    0.77
   1   4 -13    0.05    0.02
   2   4 -13   15.80    0.51
  -3   5 -13    2.31    0.13
  -1   5 -13    3.69    0.19
   0   5 -13   33.49    1.45
   1   5 -13    1.03    0.08
   2   5 -13    2.09    0.13
   0   6 -13    3.95    0.20
   1   6 -13    0.90    0.08
   2   6 -13    0.52    0.06
   3  -9 -12    1.10    0.07
   4  -9 -12    1.25    0.07
   6  -7 -12    0.98    0.06
   7  -4 -12    8.88    0.35
   7  -3 -12   32.92    1.17
  -6  -1 -12    0.03    0.02
  -5  -1 -12   11.92    0.46
  -1  -1 -12   14.55    0.93
  -6   0 -12    7.11    0.28
  -5   0 -12   33.67    1.31
  -1   0 -12   47.82    2.86
   8   0 -12    2.97    0.13
  -5   1 -12   11.45    0.34
  -4   1 -12    0.50    0.05
  -1   1 -12   15.99    0.94
   0   1 -12   19.05    1.14
   1   1 -12   28.28    1.23
   7   1 -12    0.11    0.03
  -5   2 -12    1.01    0.05
   0   2 -12    1.39    0.07
   1   2 -12   19.73    0.92
   7   2 -12   18.02    0.73
  -5   3 -12   12.41    0.53
  -4   3 -12    0.06    0.03
  -3   3 -12    1.19    0.09
   0   3 -12    4.89    0.15
   1   3 -12    2.46    0.10
   2   3 -12   22.20    1.07
   7   3 -12   31.05    1.24
  -4   4 -12   -0.04    0.03
  -3   4 -12   17.58    0.75
  -2   4 -12    3.01    0.16
  -1   4 -12    0.11    0.03
   0   4 -12   28.32    0.86
   1   4 -12    4.86    0.17
   2   4 -12   22.50    1.04
   3   4 -12   20.15    0.96
   7   4 -12    9.16    0.37
  -4   5 -12    4.35    0.20
  -3   5 -12    1.41    0.10
  -1   5 -12    9.11    0.42
   0   5 -12   18.42    0.59
   1   5 -12    5.63    0.19
   2   5 -12   16.47    0.52
  -3   6 -12    0.63    0.06
  -1   6 -12    8.96    0.43
   0   6 -12   74.99    3.27
   1   6 -12   15.55    0.67
   2   6 -12    5.56    0.26
   3   6 -12   15.85    0.69
   0   7 -12    3.33    0.18
   1   7 -12    0.11    0.04
   2   7 -12    0.07    0.03
   2 -10 -11    5.78    0.26
   3 -10 -11    3.19    0.15
   4 -10 -11    0.92    0.05
   2  -9 -11    2.66    0.13
   3  -9 -11    0.29    0.04
   4  -9 -11    0.46    0.04
   5  -9 -11    7.97    0.33
   5  -8 -11    0.37    0.04
   6  -8 -11    0.77    0.04
   6  -7 -11    0.77    0.05
   7  -6 -11    0.70    0.04
   7  -5 -11    0.15    0.03
   7  -4 -11    2.50    0.12
  -6  -3 -11    0.51    0.04
   7  -3 -11    0.04    0.03
   8  -3 -11    3.96    0.16
  -6  -2 -11   11.43    0.43
   8  -2 -11   12.87    0.47
  -6  -1 -11    2.18    0.10
   0  -1 -11   19.32    1.14
   8  -1 -11    2.85    0.12
  -6   0 -11    0.01    0.02
  -5   0 -11   -0.01    0.02
  -2   0 -11    0.07    0.04
  -1   0 -11    0.03    0.04
   0   0 -11    0.01    0.03
   8   0 -11    0.01    0.02
  -6   1 -11    2.19    0.10
  -5   1 -11    0.98    0.07
  -2   1 -11    0.55    0.09
  -1   1 -11   28.90    1.65
   0   1 -11   18.53    1.13
   1   1 -11    3.22    0.17
   7   1 -11   15.77    0.66
   8   1 -11    2.80    0.12
  -6   2 -11   10.80    0.43
  -5   2 -11    0.58    0.04
  -1   2 -11    0.02    0.04
   0   2 -11   12.78    0.46
   1   2 -11   20.96    0.95
   2   2 -11   34.62    1.49
   7   2 -11    0.07    0.03
   8   2 -11   11.32    0.46
  -5   3 -11    0.03    0.02
  -4   3 -11    2.99    0.15
  -1   3 -11    1.21    0.07
   0   3 -11    9.20    0.33
   1   3 -11    3.25    0.14
   2   3 -11    9.05    0.44
   3   3 -11    4.68    0.25
   7   3 -11    0.09    0.03
  -5   4 -11    0.04    0.03
  -4   4 -11    0.57    0.07
  -3   4 -11    3.37    0.18
  -2   4 -11    0.08    0.02
  -1   4 -11    8.82    0.41
   0   4 -11    3.37    0.11
   1   4 -11   18.21    0.49
   2   4 -11    2.37    0.15
   3   4 -11    4.30    0.24
   7   4 -11    2.48    0.12
  -5   5 -11    4.76    0.23
  -4   5 -11    0.14    0.04
  -3   5 -11   76.42    3.22
  -2   5 -11    1.48    0.10
  -1   5 -11    0.84    0.05
   0   5 -11   20.44    0.63
   1   5 -11   33.60    1.01
   2   5 -11    0.84    0.06
   3   5 -11   54.87    2.48
   7   5 -11    0.16    0.03
  -4   6 -11    0.11    0.03
  -3   6 -11   16.67    0.74
  -1   6 -11   17.93    0.59
   0   6 -11   61.56    1.83
   1   6 -11   29.96    0.91
   2   6 -11   22.97    0.71
   3   6 -11   25.67    1.13
   4   6 -11    0.12    0.04
  -3   7 -11    5.98    0.28
  -1   7 -11    0.81    0.07
   0   7 -11   24.20    1.03
   1   7 -11    7.18    0.33
   2   7 -11    0.81    0.08
   3   7 -11    2.99    0.17
   1   8 -11    1.05    0.09
   2  11 -11   -0.01    0.02
   2 -11 -10    0.33    0.03
   3 -11 -10    0.37    0.03
   2 -10 -10   23.44    1.01
   3 -10 -10    1.38    0.08
   4 -10 -10    7.71    0.32
   2  -9 -10    1.41    0.09
   5  -9 -10   12.29    0.36
   5  -8 -10   15.92    0.66
   6  -8 -10    0.19    0.02
   6  -7 -10    1.13    0.07
   7  -7 -10    0.47    0.03
   7  -6 -10    3.97    0.17
  -6  -5 -10    1.55    0.08
   6  -5 -10    0.07    0.04
   7  -5 -10    0.85    0.06
  -6  -4 -10    0.92    0.06
   7  -4 -10    1.09    0.07
   8  -4 -10    8.29    0.32
  -6  -3 -10    0.29    0.04
   7  -3 -10   19.01    0.75
   8  -3 -10    5.07    0.20
  -6  -2 -10   14.65    0.55
   8  -2 -10    0.01    0.02
  -6  -1 -10    0.07    0.02
   8  -1 -10    0.85    0.06
  -6   0 -10   23.29    0.65
  -5   0 -10    2.39    0.12
   0   0 -10   13.38    0.81
   7   0 -10    8.31    0.36
   8   0 -10    2.51    0.11
  -6   1 -10    0.02    0.02
  -5   1 -10    3.10    0.15
  -2   1 -10   14.17    0.85
  -1   1 -10    0.80    0.09
   0   1 -10   13.98    0.86
   7   1 -10    2.72    0.14
   8   1 -10    0.73    0.05
  -6   2 -10   13.41    0.40
  -5   2 -10    0.00    0.02
  -4   2 -10   13.35    0.53
  -2   2 -10    0.54    0.08
  -1   2 -10    0.93    0.05
   0   2 -10   16.80    0.59
   1   2 -10   13.46    0.50
   2   2 -10    0.11    0.03
   7   2 -10    4.95    0.22
   8   2 -10    0.03    0.02
  -6   3 -10    0.25    0.04
  -5   3 -10    0.13    0.02
  -4   3 -10    4.51    0.21
  -2   3 -10    4.70    0.33
  -1   3 -10    0.03    0.02
   0   3 -10    2.21    0.10
   1   3 -10    0.98    0.06
   2   3 -10    1.44    0.10
   3   3 -10    3.42    0.19
   7   3 -10   19.28    0.79
  -6   4 -10    0.86    0.05
  -5   4 -10    6.00    0.26
  -4   4 -10    1.50    0.10
  -3   4 -10   12.03    0.51
  -2   4 -10    0.13    0.02
  -1   4 -10    6.21    0.24
   0   4 -10   74.99    1.97
   1   4 -10   40.96    1.38
   2   4 -10   11.15    0.52
   3   4 -10   17.70    0.84
   4   4 -10   15.45    0.75
   7   4 -10    1.10    0.07
  -5   5 -10    0.19    0.04
  -4   5 -10    0.52    0.07
  -3   5 -10    1.45    0.10
  -2   5 -10   12.08    0.51
  -1   5 -10    1.42    0.07
   0   5 -10   56.94    1.50
   1   5 -10    0.36    0.04
   2   5 -10   14.54    0.65
   3   5 -10    0.07    0.05
   4   5 -10    1.93    0.13
   7   5 -10    0.96    0.07
  -5   6 -10    0.28    0.05
  -4   6 -10    9.90    0.41
  -3   6 -10    0.53    0.07
  -2   6 -10    4.24    0.16
  -1   6 -10   13.22    0.44
   0   6 -10  154.21    4.58
   1   6 -10   38.81    1.16
   2   6 -10   22.99    0.71
   3   6 -10    2.18    0.10
  -4   7 -10    6.18    0.27
  -3   7 -10    1.31    0.09
  -1   7 -10   27.54    1.19
   0   7 -10   54.67    1.67
   1   7 -10   38.96    1.21
   2   7 -10   34.01    1.06
   3   7 -10    2.32    0.14
  -3   8 -10    2.47    0.13
   0   8 -10   15.43    0.68
   1   8 -10    5.41    0.27
   2   8 -10   23.07    1.08
   3  10 -10    1.27    0.07
   3  11 -10    0.39    0.03
   2 -11  -9    0.37    0.04
   3 -11  -9    0.95    0.06
   1 -10  -9    3.61    0.17
   2 -10  -9    3.97    0.19
   3 -10  -9    3.01    0.15
   4 -10  -9    0.31    0.04
   5 -10  -9    0.04    0.02
   1  -9  -9    5.68    0.26
   2  -9  -9    1.34    0.09
   5  -9  -9    0.24    0.02
   6  -9  -9   18.57    0.72
   5  -8  -9    1.56    0.09
   6  -8  -9    6.08    0.18
   0  -7  -9   15.88    0.79
  -1  -6  -9    9.01    0.48
   7  -6  -9    1.60    0.06
   6  -5  -9    5.84    0.24
   7  -5  -9    3.25    0.15
  -6  -4  -9    0.47    0.04
   7  -4  -9    6.24    0.27
   8  -4  -9    0.14    0.02
  -6  -3  -9    0.98    0.06
   7  -3  -9    6.04    0.25
   8  -3  -9    2.67    0.12
  -6  -2  -9    1.79    0.09
   8  -2  -9    4.44    0.18
  -7  -1  -9    0.61    0.04
  -6  -1  -9    1.69    0.09
   8  -1  -9    6.51    0.25
  -7   0  -9    0.00    0.02
  -6   0  -9    0.01    0.02
   0   0  -9   -0.01    0.03
   7   0  -9    0.01    0.03
   8   0  -9    0.02    0.02
  -7   1  -9    0.57    0.04
  -6   1  -9    1.55    0.06
  -5   1  -9   65.00    2.54
  -3   1  -9   16.69    1.04
  -2   1  -9   15.78    0.96
  -1   1  -9    3.48    0.24
   0   1  -9    1.51    0.12
   1   1  -9   13.63    0.80
   2   1  -9    6.81    0.32
   7   1  -9   30.71    1.28
   8   1  -9    5.88    0.18
  -7   2  -9    0.81    0.05
  -6   2  -9    1.53    0.06
  -5   2  -9    0.41    0.04
  -4   2  -9    3.01    0.14
  -3   2  -9   55.40    3.23
  -2   2  -9   48.55    2.84
  -1   2  -9   53.48    1.91
   0   2  -9   47.31    2.83
   1   2  -9    9.17    0.34
   2   2  -9   62.41    2.76
   3   2  -9   10.43    0.49
   7   2  -9   19.85    0.80
   8   2  -9    4.27    0.19
  -6   3  -9    0.87    0.05
  -5   3  -9    6.72    0.21
  -4   3  -9    7.69    0.23
  -3   3  -9    8.72    0.58
  -2   3  -9    0.52    0.04
  -1   3  -9    1.21    0.06
   0   3  -9   17.82    0.62
   1   3  -9    0.15    0.03
   2   3  -9    0.43    0.06
   3   3  -9    7.45    0.37
   7   3  -9    5.89    0.26
   8   3  -9    2.56    0.12
  -6   4  -9    0.41    0.03
  -5   4  -9    5.51    0.17
  -4   4  -9    3.42    0.17
  -3   4  -9   15.78    0.67
  -2   4  -9    0.40    0.03
  -1   4  -9    0.04    0.02
   0   4  -9   25.62    0.71
   1   4  -9    0.68    0.05
   2   4  -9    4.89    0.19
   3   4  -9   27.86    1.26
   4   4  -9   15.69    0.73
   7   4  -9    6.57    0.28
  -6   5  -9    3.41    0.15
  -5   5  -9    2.53    0.13
  -4   5  -9    1.25    0.09
  -3   5  -9   21.33    0.88
  -2   5  -9    1.63    0.07
  -1   5  -9    7.74    0.23
   0   5  -9   86.13    2.30
   1   5  -9   74.42    1.93
   2   5  -9    0.03    0.03
   3   5  -9   18.98    0.83
   4   5  -9    6.66    0.33
   7   5  -9    3.38    0.16
  -5   6  -9    0.47    0.06
  -4   6  -9    0.59    0.07
  -3   6  -9    0.02    0.03
  -2   6  -9   10.05    0.34
  -1   6  -9    9.48    0.31
   0   6  -9   16.08    0.45
   1   6  -9   57.30    1.51
   2   6  -9   23.41    0.64
   3   6  -9   38.82    1.21
   4   6  -9   18.58    0.86
   7   6  -9    1.54    0.08
  -5   7  -9    0.08    0.03
  -4   7  -9    1.65    0.10
  -3   7  -9    4.57    0.23
  -2   7  -9    4.47    0.22
  -1   7  -9    0.25    0.03
   0   7  -9   15.83    0.50
   1   7  -9    0.05    0.02
   2   7  -9    0.03    0.03
   3   7  -9   27.93    1.27
  -4   8  -9    0.05    0.03
  -3   8  -9    4.72    0.22
   0   8  -9    6.13    0.29
   1   8  -9    5.16    0.19
   2   8  -9    3.42    0.19
  -3   9  -9    0.01    0.02
   1   9  -9    5.29    0.27
   2  11  -9    0.43    0.05
   3  11  -9    0.94    0.05
   0  12  -9    0.13    0.02
   1  12  -9    0.39    0.04
   2  12  -9    0.23    0.03
   1 -12  -8    3.25    0.15
   2 -12  -8    3.37    0.16
   1 -11  -8    7.58    0.33
   2 -11  -8    0.05    0.02
   3 -11  -8    0.04    0.02
   1 -10  -8    0.79    0.06
   2 -10  -8    2.55    0.14
   3 -10  -8   11.64    0.49
   4 -10  -8    5.10    0.23
   5 -10  -8    1.38    0.05
   1  -9  -8    0.32    0.05
   2  -9  -8    0.98    0.08
   4  -9  -8    2.63    0.13
   5  -9  -8    6.98    0.21
   6  -9  -8    0.40    0.04
   5  -8  -8    0.10    0.03
   6  -8  -8    1.01    0.04
   7  -8  -8    2.94    0.12
  -1  -7  -8    5.19    0.29
   0  -7  -8    7.80    0.40
   6  -7  -8   25.52    0.96
   7  -7  -8    0.45    0.04
  -1  -6  -8    1.76    0.12
   6  -6  -8    9.68    0.38
   7  -6  -8   26.03    0.70
  -1  -5  -8    4.10    0.24
   6  -5  -8    1.45    0.09
   7  -5  -8    6.07    0.25
   8  -5  -8    0.14    0.02
   7  -4  -8    5.28    0.22
   8  -4  -8    0.02    0.01
  -7  -3  -8    9.06    0.36
  -6  -3  -8    3.43    0.15
   6  -3  -8    0.11    0.03
   7  -3  -8    0.01    0.03
   8  -3  -8   21.64    0.79
  -7  -2  -8    8.71    0.34
  -6  -2  -8    8.77    0.34
   5  -2  -8   27.02    1.10
   8  -2  -8    1.22    0.08
  -7  -1  -8    2.37    0.11
  -6  -1  -8    3.06    0.14
   8  -1  -8    0.31    0.05
  -7   0  -8    0.44    0.04
  -6   0  -8   18.30    0.52
   1   0  -8   50.15    2.88
   7   0  -8   16.26    0.69
   8   0  -8    0.50    0.04
  -7   1  -8    2.30    0.10
  -6   1  -8    2.80    0.10
  -5   1  -8    3.24    0.15
  -1   1  -8   18.88    0.68
   0   1  -8   10.88    0.67
   1   1  -8    2.54    0.17
   2   1  -8   12.08    0.56
   7   1  -8    5.84    0.27
   8   1  -8    0.29    0.03
  -7   2  -8    8.53    0.34
  -6   2  -8    8.56    0.34
  -5   2  -8   24.41    0.68
  -4   2  -8   23.32    0.93
  -3   2  -8    2.71    0.21
  -2   2  -8   36.12    2.09
  -1   2  -8   47.64    1.70
   0   2  -8    1.56    0.13
   1   2  -8   41.60    1.42
   2   2  -8    0.31    0.04
   3   2  -8    3.44    0.18
   7   2  -8    9.33    0.39
   8   2  -8    1.21    0.08
  -7   3  -8    8.94    0.36
  -6   3  -8    3.20    0.11
  -5   3  -8    3.11    0.11
  -4   3  -8    0.55    0.06
  -3   3  -8   51.40    3.02
  -2   3  -8   23.89    0.85
  -1   3  -8    3.99    0.15
   0   3  -8   45.07    1.56
   1   3  -8  112.22    3.83
   2   3  -8   25.87    0.91
   3   3  -8   12.60    0.59
   4   3  -8    0.28    0.05
   7   3  -8    0.03    0.03
   8   3  -8   21.63    0.84
  -7   4  -8    0.29    0.03
  -6   4  -8    8.21    0.24
  -5   4  -8    2.83    0.10
  -4   4  -8    2.59    0.14
  -3   4  -8    9.68    0.34
  -2   4  -8    1.48    0.06
  -1   4  -8    2.08    0.09
   0   4  -8    1.48    0.07
   1   4  -8   43.65    1.54
   2   4  -8    0.37    0.04
   3   4  -8    0.76    0.08
   4   4  -8    2.09    0.13
   7   4  -8    5.29    0.23
   8   4  -8    0.04    0.02
  -6   5  -8    1.57    0.06
  -5   5  -8    0.30    0.03
  -4   5  -8    0.00    0.03
  -3   5  -8    2.09    0.12
  -2   5  -8    3.15    0.10
  -1   5  -8    4.46    0.17
   0   5  -8    0.04    0.02
   1   5  -8    0.04    0.02
   2   5  -8    8.51    0.32
   3   5  -8    0.86    0.09
   4   5  -8    0.06    0.05
   7   5  -8    6.44    0.27
  -5   6  -8    0.46    0.06
  -4   6  -8    1.99    0.12
  -3   6  -8   16.32    0.67
  -2   6  -8    3.90    0.14
  -1   6  -8    1.89    0.07
   0   6  -8    5.55    0.17
   1   6  -8    0.47    0.04
   2   6  -8   24.43    0.66
   3   6  -8   78.90    3.34
   4   6  -8    3.00    0.18
   7   6  -8   25.13    1.02
  -5   7  -8    1.37    0.08
  -4   7  -8    1.51    0.10
  -3   7  -8    4.26    0.21
  -2   7  -8    0.85    0.08
  -1   7  -8    5.15    0.18
   0   7  -8    7.59    0.23
   1   7  -8   23.39    0.66
   2   7  -8   28.04    0.89
   3   7  -8   17.51    0.81
   6   7  -8   23.66    0.98
  -4   8  -8    3.12    0.15
  -3   8  -8    7.04    0.32
  -2   8  -8    0.21    0.04
   0   8  -8   31.34    0.97
   1   8  -8   16.52    0.54
   2   8  -8   20.52    0.98
  -4   9  -8    1.83    0.10
  -3   9  -8    1.21    0.08
   3  10  -8   10.93    0.44
   4  10  -8    4.75    0.20
   2  11  -8    0.04    0.02
   3  11  -8    0.03    0.01
   4  11  -8    1.15    0.06
   1  12  -8    3.36    0.14
   2  12  -8    3.43    0.14
   1 -12  -7    2.89    0.14
   2 -12  -7   16.87    0.70
   1 -11  -7    0.08    0.02
   2 -11  -7    0.28    0.04
   3 -11  -7    1.44    0.08
   1 -10  -7    2.89    0.16
   2 -10  -7    6.78    0.32
   3 -10  -7    0.18    0.03
   4 -10  -7    4.54    0.14
   5 -10  -7    0.35    0.03
   1  -9  -7    0.94    0.07
   2  -9  -7    1.90    0.11
   4  -9  -7    0.96    0.07
   5  -9  -7    8.27    0.26
   6  -9  -7    1.15    0.06
   0  -8  -7   24.40    1.17
   4  -8  -7    0.50    0.06
   5  -8  -7    0.53    0.06
   6  -8  -7    7.02    0.30
   7  -8  -7    2.29    0.10
  -2  -7  -7   11.46    0.59
  -1  -7  -7    8.30    0.43
   0  -7  -7    0.02    0.02
   6  -7  -7    4.34    0.19
   7  -7  -7   21.28    0.58
  -2  -6  -7    2.31    0.14
  -1  -6  -7    0.05    0.03
   6  -6  -7   25.53    0.97
   7  -6  -7    2.26    0.08
  -2  -5  -7   33.84    1.64
  -1  -5  -7   45.46    2.30
   6  -5  -7    1.49    0.10
   7  -5  -7    6.18    0.25
   8  -5  -7    0.47    0.03
   6  -4  -7    0.24    0.04
   7  -4  -7    0.20    0.04
   8  -4  -7    0.67    0.05
  -7  -3  -7    0.03    0.02
   6  -3  -7    0.03    0.02
   7  -3  -7    1.70    0.10
   8  -3  -7    0.15    0.03
  -7  -2  -7    1.14    0.07
  -6  -2  -7    9.15    0.35
   5  -2  -7   15.33    0.62
   6  -2  -7   56.85    2.30
   8  -2  -7    2.79    0.14
  -7  -1  -7    0.25    0.03
  -6  -1  -7   11.91    0.46
   5  -1  -7    0.08    0.03
   6  -1  -7    5.13    0.25
   7  -1  -7    0.98    0.08
   8  -1  -7    1.69    0.09
  -7   0  -7    0.00    0.02
  -6   0  -7    0.01    0.03
   1   0  -7    0.01    0.02
   6   0  -7    0.02    0.03
   7   0  -7    0.02    0.03
   8   0  -7    0.00    0.02
  -7   1  -7    0.30    0.04
  -6   1  -7   11.49    0.33
  -5   1  -7   10.19    0.41
  -1   1  -7    6.34    0.29
   0   1  -7   99.37    5.70
   1   1  -7    3.28    0.20
   2   1  -7   49.66    2.28
   7   1  -7    1.05    0.08
   8   1  -7    1.60    0.07
  -7   2  -7    1.12    0.07
  -6   2  -7    8.91    0.26
  -5   2  -7    3.68    0.12
  -4   2  -7    0.65    0.09
  -3   2  -7   10.99    0.67
  -2   2  -7    0.05    0.02
  -1   2  -7    6.56    0.24
   0   2  -7  189.47   11.08
   1   2  -7    1.80    0.08
   2   2  -7    2.11    0.12
   3   2  -7  188.90    8.35
   7   2  -7    2.55    0.13
   8   2  -7    3.12    0.14
  -7   3  -7    0.05    0.02
  -6   3  -7    2.69    0.10
  -5   3  -7    0.10    0.02
  -3   3  -7    2.36    0.19
  -2   3  -7    1.30    0.06
  -1   3  -7   83.71    2.93
   0   3  -7   69.27    4.07
   1   3  -7  181.46    6.32
   2   3  -7   15.12    0.54
   3   3  -7    6.39    0.30
   4   3  -7    0.71    0.07
   7   3  -7    1.75    0.10
   8   3  -7    0.17    0.03
  -7   4  -7    9.75    0.38
  -6   4  -7    0.00    0.02
  -5   4  -7    0.49    0.04
  -4   4  -7   14.22    0.39
  -3   4  -7    0.75    0.06
  -2   4  -7    9.66    0.35
  -1   4  -7    3.17    0.12
   0   4  -7  113.52    3.96
   1   4  -7   10.53    0.39
   2   4  -7    5.62    0.22
   3   4  -7    2.86    0.16
   4   4  -7    5.45    0.27
   5   4  -7    6.11    0.31
   7   4  -7    0.20    0.04
   8   4  -7    0.73    0.05
  -7   5  -7    5.93    0.23
  -6   5  -7    0.16    0.02
  -5   5  -7    0.15    0.03
  -4   5  -7   23.22    0.89
  -3   5  -7   45.98    1.50
  -2   5  -7   33.61    0.89
  -1   5  -7   50.49    1.65
   0   5  -7   19.35    0.53
   1   5  -7    1.62    0.06
   2   5  -7    2.70    0.12
   3   5  -7    0.35    0.06
   4   5  -7    0.86    0.09
   5   5  -7    0.09    0.04
   7   5  -7    6.10    0.26
  -6   6  -7    4.54    0.14
  -5   6  -7    0.14    0.04
  -4   6  -7   11.79    0.49
  -3   6  -7   10.03    0.42
  -2   6  -7    2.21    0.10
  -1   6  -7    0.05    0.02
   0   6  -7    8.61    0.25
   1   6  -7   14.79    0.40
   2   6  -7    0.34    0.03
   3   6  -7    0.32    0.06
   4   6  -7    5.32    0.26
   7   6  -7    2.30    0.11
  -5   7  -7    9.62    0.42
  -4   7  -7    8.24    0.36
  -3   7  -7    2.67    0.15
  -2   7  -7   11.26    0.49
  -1   7  -7    8.09    0.30
   0   7  -7    0.05    0.02
   1   7  -7    0.06    0.02
   2   7  -7    0.25    0.03
   3   7  -7   45.08    1.98
   4   7  -7   11.34    0.54
  -5   8  -7   11.45    0.34
  -4   8  -7    2.02    0.11
  -3   8  -7    2.12    0.13
  -2   8  -7   13.61    0.59
   0   8  -7   24.01    1.03
   1   8  -7    0.60    0.05
   2   8  -7    0.96    0.10
   3   8  -7   29.12    1.34
  -4   9  -7    1.12    0.08
  -3   9  -7    1.41    0.09
  -2   9  -7    0.24    0.04
   4   9  -7    0.99    0.07
  -3  10  -7    0.21    0.03
   3  10  -7    0.12    0.03
   4  10  -7    4.34    0.18
   2  11  -7    0.23    0.03
   3  11  -7    1.38    0.06
   4  11  -7    5.20    0.21
   0  12  -7    1.45    0.07
   1  12  -7    3.05    0.13
   2  12  -7   17.12    0.63
   3  12  -7    2.03    0.09
   0 -12  -6    0.57    0.04
   1 -12  -6    4.79    0.22
   2 -12  -6    0.10    0.02
   3 -12  -6    8.81    0.39
   0 -11  -6    1.58    0.09
   1 -11  -6    0.03    0.02
   2 -11  -6    0.15    0.03
   3 -11  -6    0.22    0.04
   4 -11  -6    0.68    0.03
   5 -11  -6    0.65    0.04
   0 -10  -6    0.56    0.05
   1 -10  -6    1.91    0.11
   2 -10  -6    3.04    0.16
   3 -10  -6    0.51    0.05
   4 -10  -6    0.65    0.04
   5 -10  -6    0.66    0.03
   0  -9  -6   64.32    2.63
   1  -9  -6    4.60    0.23
   2  -9  -6    0.29    0.05
   4  -9  -6    6.47    0.20
   5  -9  -6    1.33    0.06
   6  -9  -6    1.51    0.08
  -1  -8  -6    5.49    0.29
   0  -8  -6   47.79    2.30
   1  -8  -6   20.54    0.98
   4  -8  -6    0.05    0.03
   5  -8  -6    9.20    0.38
   6  -8  -6   15.34    0.60
   7  -8  -6    9.56    0.38
  -2  -7  -6    1.60    0.11
  -1  -7  -6    1.58    0.11
   0  -7  -6   44.85    2.11
   5  -7  -6    3.63    0.19
   6  -7  -6    1.17    0.06
   7  -7  -6   12.58    0.34
  -2  -6  -6    1.16    0.09
  -1  -6  -6    2.71    0.16
   6  -6  -6    3.45    0.17
   7  -6  -6    0.33    0.03
   8  -6  -6    1.13    0.06
  -2  -5  -6    0.13    0.03
  -1  -5  -6    0.98    0.07
   6  -5  -6    1.21    0.06
   7  -5  -6   14.44    0.55
   8  -5  -6    0.25    0.04
  -2  -4  -6   55.26    2.69
   6  -4  -6    5.74    0.18
   7  -4  -6    3.56    0.12
   8  -4  -6    0.30    0.05
  -7  -3  -6    2.87    0.13
   5  -3  -6   14.90    0.62
   6  -3  -6   34.55    1.38
   7  -3  -6   15.04    0.59
   8  -3  -6    0.03    0.03
  -7  -2  -6    0.81    0.06
  -6  -2  -6   13.98    0.54
   5  -2  -6    0.03    0.02
   6  -2  -6    3.35    0.16
   7  -2  -6    3.49    0.17
   8  -2  -6    0.18    0.03
  -7  -1  -6    0.23    0.03
  -6  -1  -6    0.51    0.06
   5  -1  -6    0.01    0.02
   6  -1  -6    3.32    0.11
   7  -1  -6   13.07    0.56
   8  -1  -6    3.67    0.12
  -7   0  -6    6.32    0.26
  -6   0  -6   14.51    0.56
   1   0  -6    0.02    0.02
   4   0  -6   16.05    0.66
   6   0  -6    0.05    0.03
   7   0  -6    1.08    0.08
   8   0  -6    3.00    0.10
  -7   1  -6    0.23    0.03
  -6   1  -6    0.25    0.04
  -5   1  -6   10.71    0.44
   0   1  -6   28.84    1.71
   1   1  -6    0.20    0.03
   2   1  -6   30.14    1.36
   3   1  -6    4.15    0.21
   7   1  -6   13.44    0.56
   8   1  -6    3.93    0.18
  -7   2  -6    0.84    0.06
  -6   2  -6   13.96    0.39
  -5   2  -6    5.24    0.16
  -3   2  -6    0.37    0.06
  -2   2  -6   17.73    0.64
  -1   2  -6    9.72    0.36
   0   2  -6  113.02    6.55
   1   2  -6   12.26    0.45
   2   2  -6   19.27    0.69
   3   2  -6    2.32    0.13
   4   2  -6   10.57    0.46
   7   2  -6    3.49    0.17
   8   2  -6    0.10    0.03
  -7   3  -6    3.22    0.14
  -6   3  -6    2.16    0.08
  -5   3  -6   19.06    0.52
  -3   3  -6    0.04    0.03
  -2   3  -6   10.04    0.35
  -1   3  -6    4.92    0.19
   0   3  -6  417.15   24.54
   1   3  -6    2.23    0.10
   2   3  -6    5.72    0.22
   3   3  -6   26.11    1.19
   4   3  -6    2.58    0.15
   7   3  -6   15.74    0.62
   8   3  -6    0.05    0.03
  -7   4  -6    2.17    0.10
  -6   4  -6    4.07    0.13
  -5   4  -6    0.06    0.04
  -4   4  -6    2.24    0.12
  -3   4  -6    9.71    0.33
  -2   4  -6   59.05    1.93
  -1   4  -6   29.13    1.01
   0   4  -6  369.34   10.24
   1   4  -6    0.29    0.04
   2   4  -6   89.34    3.19
   3   4  -6    5.40    0.26
   4   4  -6    2.51    0.15
   5   4  -6    5.23    0.26
   7   4  -6    3.78    0.17
   8   4  -6    0.39    0.05
  -7   5  -6    5.88    0.22
  -6   5  -6   12.46    0.36
  -5   5  -6   42.84    1.17
  -4   5  -6    6.89    0.20
  -3   5  -6   60.14    1.97
  -2   5  -6    0.10    0.02
  -1   5  -6    1.14    0.10
   0   5  -6    8.03    0.23
   1   5  -6    7.55    0.22
   2   5  -6    6.30    0.24
   3   5  -6   12.98    0.47
   4   5  -6    1.01    0.09
   5   5  -6   32.47    1.44
   7   5  -6   14.76    0.57
  -6   6  -6    0.56    0.04
  -5   6  -6    3.30    0.11
  -4   6  -6    3.58    0.18
  -3   6  -6    0.05    0.03
  -2   6  -6    1.28    0.07
  -1   6  -6    2.97    0.09
   0   6  -6    5.33    0.16
   1   6  -6    0.84    0.04
   2   6  -6    2.31    0.08
   3   6  -6   10.74    0.40
   4   6  -6    0.17    0.05
   5   6  -6   43.11    1.90
   6   6  -6    3.44    0.17
   7   6  -6    0.42    0.05
  -6   7  -6    0.28    0.02
  -5   7  -6    0.09    0.03
  -4   7  -6    0.06    0.03
  -3   7  -6    6.03    0.28
  -2   7  -6    1.53    0.08
  -1   7  -6    1.60    0.06
   0   7  -6   43.67    1.19
   1   7  -6    1.94    0.07
   2   7  -6    5.84    0.23
   3   7  -6    1.12    0.07
   4   7  -6    4.53    0.23
  -5   8  -6    3.22    0.11
  -4   8  -6    4.89    0.23
  -3   8  -6    0.15    0.04
  -2   8  -6    6.65    0.31
   0   8  -6   47.29    2.04
   1   8  -6   18.91    0.90
   2   8  -6   36.23    1.69
   3   8  -6    2.44    0.15
  -4   9  -6   21.05    0.85
  -3   9  -6    0.07    0.03
  -2   9  -6    2.91    0.15
   2   9  -6    0.18    0.06
   4   9  -6    6.17    0.26
  -4  10  -6    2.10    0.11
  -3  10  -6    9.52    0.41
  -2  10  -6    0.58    0.06
   3  10  -6    0.35    0.04
   4  10  -6    0.66    0.05
   2  11  -6    0.06    0.03
   3  11  -6    0.06    0.02
   4  11  -6    0.65    0.05
   0  12  -6    0.48    0.05
   1  12  -6    5.12    0.20
   2  12  -6    0.08    0.02
   3  12  -6    9.02    0.35
   1  13  -6    0.06    0.01
   1 -13  -5    3.71    0.17
   0 -12  -5    2.47    0.12
   1 -12  -5    0.02    0.02
   2 -12  -5    0.06    0.02
   3 -12  -5   15.35    0.65
   0 -11  -5   11.72    0.52
   1 -11  -5    3.98    0.20
   2 -11  -5    0.00    0.02
   3 -11  -5    0.78    0.06
   4 -11  -5    0.02    0.01
   5 -11  -5    2.61    0.11
   0 -10  -5    7.82    0.36
   1 -10  -5    7.48    0.35
   2 -10  -5    0.47    0.05
   3 -10  -5   31.64    1.31
   4 -10  -5    6.93    0.21
   5 -10  -5    1.11    0.05
   6 -10  -5    0.71    0.04
   0  -9  -5   12.95    0.57
   1  -9  -5   21.98    0.98
   2  -9  -5    3.59    0.18
   3  -9  -5    5.00    0.16
   4  -9  -5    0.02    0.02
   5  -9  -5   25.68    0.74
   6  -9  -5    4.23    0.18
  -2  -8  -5    0.28    0.05
  -1  -8  -5   12.58    0.46
   0  -8  -5    1.74    0.09
   1  -8  -5    0.18    0.04
   4  -8  -5    1.12    0.08
   5  -8  -5    5.02    0.23
   6  -8  -5    4.62    0.20
   7  -8  -5    0.04    0.01
  -3  -7  -5    4.37    0.26
  -2  -7  -5    0.38    0.05
  -1  -7  -5    0.23    0.04
   0  -7  -5    2.48    0.15
   5  -7  -5    5.54    0.25
   6  -7  -5    0.54    0.04
   7  -7  -5    0.51    0.03
  -3  -6  -5    1.87    0.12
  -2  -6  -5    0.73    0.06
  -1  -6  -5    7.35    0.36
   5  -6  -5    7.58    0.33
   6  -6  -5    9.32    0.37
   7  -6  -5    0.05    0.02
   8  -6  -5    4.97    0.20
  -3  -5  -5    3.24    0.18
  -2  -5  -5   12.15    0.60
  -1  -5  -5   11.89    0.60
   5  -5  -5    1.26    0.08
   6  -5  -5   15.07    0.43
   7  -5  -5   11.88    0.33
   8  -5  -5    6.35    0.25
  -2  -4  -5    0.29    0.03
   5  -4  -5    6.66    0.29
   6  -4  -5    6.18    0.19
   7  -4  -5    2.95    0.11
   8  -4  -5    0.02    0.03
  -2  -3  -5    4.62    0.25
   5  -3  -5   16.73    0.70
   6  -3  -5    2.70    0.14
   7  -3  -5    5.10    0.22
   8  -3  -5    5.71    0.23
  -7  -2  -5    0.05    0.02
  -6  -2  -5    5.49    0.24
   5  -2  -5    8.66    0.37
   6  -2  -5    5.56    0.25
   7  -2  -5    0.10    0.04
   8  -2  -5    0.26    0.04
  -7  -1  -5    0.59    0.05
  -6  -1  -5    2.12    0.11
   5  -1  -5    6.68    0.29
   6  -1  -5   67.86    1.90
   7  -1  -5   10.35    0.31
   8  -1  -5   39.79    1.14
  -8   0  -5    0.01    0.02
  -7   0  -5    0.10    0.03
  -6   0  -5    0.05    0.03
   1   0  -5    0.02    0.01
   4   0  -5    0.01    0.01
   5   0  -5   -0.01    0.01
   6   0  -5    0.00    0.02
   7   0  -5    0.02    0.03
   8   0  -5   -0.01    0.02
  -8   1  -5   14.46    0.56
  -7   1  -5    0.61    0.05
  -6   1  -5    2.23    0.11
   0   1  -5    5.68    0.35
   1   1  -5    0.15    0.03
   2   1  -5   78.54    2.75
   3   1  -5   28.57    1.31
   6   1  -5   68.35    2.67
   7   1  -5   10.81    0.44
   8   1  -5   43.30    1.66
  -8   2  -5    2.95    0.12
  -7   2  -5    0.00    0.02
  -6   2  -5    5.71    0.24
  -5   2  -5    6.16    0.19
  -3   2  -5  132.47    7.90
  -2   2  -5    9.73    0.34
  -1   2  -5   39.11    2.32
   0   2  -5   56.17    3.20
   1   2  -5   21.58    0.78
   2   2  -5    0.02    0.02
   3   2  -5   25.58    1.15
   4   2  -5    3.89    0.19
   6   2  -5    5.72    0.25
   7   2  -5    0.07    0.04
   8   2  -5    0.40    0.05
  -7   3  -5    0.05    0.03
  -6   3  -5    0.07    0.02
  -5   3  -5   27.89    0.77
  -4   3  -5    4.54    0.21
  -3   3  -5   10.36    0.64
  -2   3  -5    5.18    0.18
  -1   3  -5   14.35    0.50
   0   3  -5    3.36    0.22
   1   3  -5    1.84    0.08
   2   3  -5    2.85    0.12
   3   3  -5   19.15    0.87
   4   3  -5    0.45    0.05
   5   3  -5   16.68    0.77
   7   3  -5    5.28    0.23
   8   3  -5    5.93    0.25
  -7   4  -5    1.09    0.06
  -6   4  -5    9.68    0.28
  -5   4  -5    9.24    0.27
  -4   4  -5   23.58    0.93
  -3   4  -5   29.22    1.78
  -2   4  -5    0.15    0.02
  -1   4  -5    8.74    0.30
   0   4  -5   52.35    1.43
   1   4  -5   15.23    0.55
   2   4  -5   69.36    2.46
   3   4  -5  165.77    5.72
   4   4  -5    8.26    0.40
   5   4  -5    6.18    0.32
   6   4  -5    6.38    0.27
   7   4  -5    3.16    0.15
   8   4  -5    0.04    0.03
  -7   5  -5    0.38    0.04
  -6   5  -5    3.92    0.13
  -5   5  -5    1.70    0.07
  -4   5  -5    5.89    0.25
  -3   5  -5    3.38    0.16
  -2   5  -5   13.13    0.74
  -1   5  -5   12.39    0.43
   0   5  -5   18.61    0.52
   1   5  -5    4.46    0.14
   2   5  -5    3.67    0.15
   3   5  -5   16.25    0.59
   4   5  -5   35.70    1.55
   5   5  -5    1.25    0.09
   6   5  -5   15.12    0.62
   7   5  -5   12.20    0.48
  -7   6  -5    1.28    0.06
  -6   6  -5    0.03    0.02
  -5   6  -5    5.66    0.18
  -4   6  -5    8.65    0.37
  -3   6  -5    2.01    0.11
  -2   6  -5    0.68    0.05
  -1   6  -5    7.18    0.20
   0   6  -5   29.32    0.81
   1   6  -5    0.02    0.03
   2   6  -5   35.27    1.23
   3   6  -5    0.09    0.03
   4   6  -5    0.48    0.07
   5   6  -5    7.75    0.36
   6   6  -5    9.06    0.38
   7   6  -5    0.03    0.03
  -6   7  -5   12.23    0.35
  -5   7  -5    0.11    0.02
  -4   7  -5    1.99    0.12
  -3   7  -5    4.49    0.22
  -2   7  -5    0.41    0.04
  -1   7  -5    0.20    0.02
   0   7  -5    2.25    0.08
   1   7  -5   10.53    0.30
   2   7  -5    2.90    0.13
   3   7  -5    0.57    0.06
   4   7  -5    1.11    0.09
  -5   8  -5    7.75    0.23
  -4   8  -5    0.58    0.07
  -3   8  -5  110.75    4.38
  -2   8  -5    0.19    0.04
  -1   8  -5   11.88    0.41
   0   8  -5    1.65    0.08
   1   8  -5    0.05    0.03
   2   8  -5    0.05    0.05
   3   8  -5   26.90    1.22
   4   8  -5    1.12    0.08
  -5   9  -5    0.30    0.03
  -4   9  -5   26.74    1.05
  -3   9  -5    3.51    0.17
  -2   9  -5   11.67    0.50
   2   9  -5    3.56    0.20
   3   9  -5    4.78    0.21
   4   9  -5    0.02    0.02
  -4  10  -5   21.34    0.84
  -3  10  -5   12.49    0.52
  -2  10  -5    2.24    0.12
   3  10  -5   31.17    1.18
   4  10  -5    6.86    0.27
  -3  11  -5    4.26    0.19
  -2  11  -5    6.06    0.27
   2  11  -5    0.02    0.03
   3  11  -5    0.80    0.04
   4  11  -5    0.01    0.01
   0  12  -5    2.38    0.11
   1  12  -5    0.05    0.02
   2  12  -5    0.04    0.02
   3  12  -5   15.50    0.45
   4  12  -5   11.99    0.46
   0  13  -5    0.56    0.03
   1  13  -5    3.85    0.12
   2  13  -5    0.96    0.05
   0 -13  -4    8.98    0.39
   1 -13  -4    1.91    0.09
   2 -13  -4    0.25    0.03
   0 -12  -4    7.66    0.34
   1 -12  -4    0.40    0.04
   2 -12  -4    4.97    0.22
   3 -12  -4    0.90    0.06
   4 -12  -4    0.41    0.03
   0 -11  -4    2.27    0.13
   1 -11  -4    4.46    0.22
   2 -11  -4    3.42    0.17
   3 -11  -4    2.36    0.12
   4 -11  -4    5.84    0.18
   5 -11  -4    1.25    0.06
   0 -10  -4   38.87    1.67
   1 -10  -4   18.43    0.81
   2 -10  -4   12.20    0.53
   3 -10  -4    0.08    0.02
   4 -10  -4    0.06    0.02
   5 -10  -4    1.09    0.07
   6 -10  -4    0.13    0.02
   0  -9  -4    3.99    0.15
   1  -9  -4   35.34    1.14
   2  -9  -4   10.12    0.44
   3  -9  -4    6.87    0.22
   4  -9  -4    2.22    0.09
   5  -9  -4    0.39    0.05
   6  -9  -4    0.91    0.06
  -2  -8  -4    2.32    0.12
  -1  -8  -4    9.45    0.35
   0  -8  -4    3.63    0.16
   1  -8  -4    1.68    0.11
   4  -8  -4   15.39    0.65
   5  -8  -4    9.94    0.40
   6  -8  -4    5.32    0.16
   7  -8  -4    0.67    0.03
  -3  -7  -4    1.13    0.09
  -2  -7  -4    0.06    0.03
  -1  -7  -4    0.24    0.04
   0  -7  -4   24.06    0.89
   5  -7  -4    2.05    0.07
   6  -7  -4    0.75    0.05
   7  -7  -4    0.18    0.02
  -3  -6  -4   12.90    0.62
  -2  -6  -4    1.30    0.09
  -1  -6  -4    0.74    0.06
   5  -6  -4   51.75    1.99
   6  -6  -4    1.75    0.07
   7  -6  -4    7.12    0.21
   8  -6  -4    3.43    0.14
  -3  -5  -4   51.96    2.60
  -2  -5  -4    6.94    0.35
  -1  -5  -4   55.75    2.67
   5  -5  -4    1.02    0.07
   6  -5  -4    0.44    0.04
   7  -5  -4    0.53    0.04
   8  -5  -4    0.01    0.02
  -3  -4  -4   50.27    2.37
  -2  -4  -4   26.54    1.37
   5  -4  -4    8.25    0.35
   6  -4  -4   18.19    0.50
   7  -4  -4    3.53    0.13
   8  -4  -4    3.29    0.15
  -2  -3  -4   55.14    2.84
   5  -3  -4    3.58    0.17
   6  -3  -4    1.32    0.08
   7  -3  -4    3.36    0.16
   8  -3  -4    1.75    0.09
  -7  -2  -4    0.91    0.07
  -6  -2  -4    1.92    0.10
  -2  -2  -4   80.16    3.91
   5  -2  -4   17.89    0.75
   6  -2  -4    6.05    0.19
   7  -2  -4    4.33    0.14
   8  -2  -4    0.12    0.02
  -7  -1  -4   33.57    1.32
  -6  -1  -4   29.48    1.12
   4  -1  -4    0.20    0.02
   5  -1  -4   12.21    0.52
   6  -1  -4    2.39    0.09
   7  -1  -4    6.59    0.21
   8  -1  -4    4.02    0.11
  -8   0  -4    5.70    0.25
  -7   0  -4   99.82    3.71
  -6   0  -4   19.26    0.70
   1   0  -4  284.68   17.32
   4   0  -4    6.90    0.30
   5   0  -4   10.70    0.46
   6   0  -4   30.05    0.85
   7   0  -4    0.00    0.02
   8   0  -4    1.59    0.09
  -8   1  -4    3.74    0.16
  -7   1  -4   35.79    1.32
  -6   1  -4   29.99    1.12
   0   1  -4  249.94   15.05
   1   1  -4  414.35   24.53
   2   1  -4    1.74    0.07
   3   1  -4    0.22    0.03
   4   1  -4    0.20    0.02
   5   1  -4   12.79    0.52
   6   1  -4    2.37    0.13
   7   1  -4    7.25    0.30
   8   1  -4    4.52    0.20
  -8   2  -4    4.26    0.17
  -7   2  -4    0.95    0.07
  -6   2  -4    2.00    0.11
  -5   2  -4    0.90    0.08
  -3   2  -4    5.98    0.38
  -2   2  -4   84.01    4.77
  -1   2  -4   19.30    1.18
   0   2  -4  653.36   38.91
   1   2  -4  173.31    6.37
   2   2  -4   90.92    3.22
   3   2  -4   47.40    2.12
   4   2  -4   20.31    0.94
   6   2  -4    6.16    0.27
   7   2  -4    4.43    0.20
   8   2  -4    0.18    0.04
  -8   3  -4    0.01    0.02
  -7   3  -4    0.34    0.05
  -6   3  -4   36.08    1.30
  -5   3  -4    5.56    0.25
  -4   3  -4    0.52    0.06
  -3   3  -4   16.14    0.99
  -2   3  -4   62.23    2.04
  -1   3  -4    9.70    0.58
   1   3  -4    1.48    0.07
   2   3  -4    0.11    0.02
   3   3  -4   21.09    0.74
   4   3  -4    1.07    0.07
   5   3  -4    3.32    0.18
   6   3  -4    1.38    0.10
   7   3  -4    3.34    0.16
   8   3  -4    1.81    0.10
  -7   4  -4    0.42    0.05
  -6   4  -4    4.48    0.14
  -5   4  -4    0.82    0.05
  -4   4  -4    4.70    0.21
  -3   4  -4   52.11    2.91
  -2   4  -4   29.61    0.98
  -1   4  -4  116.35    3.91
   0   4  -4  133.16    3.69
   1   4  -4   36.90    1.29
   2   4  -4   41.90    1.41
   3   4  -4   22.15    0.78
   4   4  -4   13.64    0.64
   5   4  -4    7.96    0.39
   6   4  -4   17.62    0.54
   7   4  -4    3.86    0.17
   8   4  -4    3.34    0.15
  -7   5  -4    4.06    0.17
  -6   5  -4    4.81    0.15
  -5   5  -4   23.43    0.66
  -4   5  -4    2.32    0.13
  -3   5  -4   55.13    2.16
  -2   5  -4    6.75    0.43
  -1   5  -4   54.64    1.51
   0   5  -4   12.66    0.36
   1   5  -4   84.83    2.35
   2   5  -4   10.11    0.37
   3   5  -4   50.13    1.76
   4   5  -4    0.81    0.07
   5   5  -4    0.93    0.08
   6   5  -4    0.33    0.05
   7   5  -4    0.52    0.06
   8   5  -4    0.00    0.03
  -7   6  -4   14.29    0.54
  -6   6  -4    2.81    0.10
  -5   6  -4    5.88    0.18
  -4   6  -4    0.65    0.05
  -3   6  -4   12.79    0.52
  -2   6  -4    1.09    0.11
  -1   6  -4    0.62    0.04
   0   6  -4    7.52    0.22
   1   6  -4    0.21    0.02
   2   6  -4    3.96    0.16
   3   6  -4    0.76    0.06
   4   6  -4    1.89    0.12
   5   6  -4   49.43    2.20
  -7   7  -4    0.04    0.02
  -6   7  -4   20.36    0.59
  -5   7  -4    8.75    0.25
  -4   7  -4    8.86    0.37
  -3   7  -4    1.17    0.09
  -2   7  -4    0.09    0.03
  -1   7  -4    0.22    0.03
   0   7  -4   23.05    0.83
   1   7  -4    9.36    0.35
   2   7  -4   20.86    0.73
   3   7  -4    3.12    0.13
   4   7  -4    2.31    0.13
  -6   8  -4   13.37    0.37
  -5   8  -4   24.61    0.54
  -4   8  -4   10.38    0.30
  -3   8  -4   54.32    1.48
  -2   8  -4    2.33    0.13
  -1   8  -4    8.75    0.31
   0   8  -4    3.27    0.25
   1   8  -4    1.55    0.09
   2   8  -4    7.11    0.28
   3   8  -4    1.59    0.11
   4   8  -4   15.50    0.48
  -5   9  -4    3.89    0.12
  -4   9  -4    9.76    0.28
  -3   9  -4    0.42    0.06
  -2   9  -4   45.38    1.91
  -1   9  -4   53.41    2.10
   3   9  -4    6.64    0.29
   4   9  -4    2.17    0.11
  -4  10  -4    1.57    0.09
  -3  10  -4    2.05    0.11
  -2  10  -4   13.66    0.59
  -1  10  -4   10.04    0.41
   3  10  -4    0.02    0.03
   4  10  -4    0.04    0.02
   5  10  -4    0.93    0.06
  -3  11  -4    3.61    0.16
  -2  11  -4    0.31    0.04
   1  11  -4    4.49    0.20
   2  11  -4    3.37    0.15
   3  11  -4    2.44    0.09
   4  11  -4    5.78    0.18
   5  11  -4    1.11    0.06
   0  12  -4    7.52    0.31
   1  12  -4    0.33    0.05
   2  12  -4    5.00    0.16
   3  12  -4    0.95    0.04
   4  12  -4    0.47    0.03
   0  13  -4    8.95    0.44
   1  13  -4    1.79    0.07
   2  13  -4    0.27    0.02
   0 -13  -3    0.86    0.05
   1 -13  -3    5.02    0.23
   2 -13  -3    0.07    0.02
  -1 -12  -3    1.86    0.10
   0 -12  -3    2.81    0.14
   1 -12  -3    6.15    0.27
   2 -12  -3    2.68    0.14
   3 -12  -3    1.93    0.10
   4 -12  -3    3.81    0.16
  -1 -11  -3    2.07    0.11
   0 -11  -3   14.92    0.65
   1 -11  -3    0.02    0.02
   2 -11  -3    6.30    0.28
   3 -11  -3    2.22    0.08
   4 -11  -3   42.32    1.20
   5 -11  -3    0.24    0.03
  -1 -10  -3    0.03    0.02
   0 -10  -3   55.55    2.36
   1 -10  -3   20.81    0.91
   2 -10  -3   44.90    1.83
   3 -10  -3   22.95    0.66
   4 -10  -3   11.83    0.36
   5 -10  -3    1.73    0.09
   6 -10  -3    0.13    0.02
  -1  -9  -3   12.85    0.42
   0  -9  -3    0.79    0.04
   1  -9  -3    7.30    0.26
   2  -9  -3   21.42    0.89
   3  -9  -3    0.11    0.02
   4  -9  -3    8.82    0.27
   5  -9  -3    0.18    0.04
   6  -9  -3    1.51    0.08
  -2  -8  -3   20.37    0.75
  -1  -8  -3    6.48    0.25
   0  -8  -3    5.11    0.21
   1  -8  -3   13.57    0.67
   4  -8  -3    2.53    0.09
   5  -8  -3   25.54    1.00
   6  -8  -3    2.13    0.08
   7  -8  -3    0.55    0.03
  -3  -7  -3    8.80    0.44
  -2  -7  -3    1.84    0.12
  -1  -7  -3    1.49    0.09
   0  -7  -3    1.23    0.07
   1  -7  -3    0.52    0.07
   5  -7  -3   31.54    0.71
   6  -7  -3    5.98    0.18
   7  -7  -3    2.74    0.09
  -4  -6  -3   25.09    1.25
  -3  -6  -3    0.37    0.05
  -2  -6  -3   90.96    4.02
  -1  -6  -3   13.05    0.62
   1  -6  -3    0.28    0.05
   5  -6  -3   11.45    0.46
   6  -6  -3   13.17    0.38
   7  -6  -3    0.13    0.02
   8  -6  -3    0.23    0.03
  -8  -5  -3    0.01    0.01
  -4  -5  -3   18.90    0.91
  -3  -5  -3   21.74    1.05
  -2  -5  -3    1.59    0.10
  -1  -5  -3    2.20    0.13
   1  -5  -3    0.06    0.03
   5  -5  -3   39.04    1.48
   6  -5  -3   12.90    0.30
   7  -5  -3    4.31    0.14
   8  -5  -3   11.05    0.44
  -8  -4  -3    1.14    0.06
  -3  -4  -3   12.87    0.63
  -2  -4  -3   30.38    1.53
  -1  -4  -3    8.05    0.42
   5  -4  -3   15.03    0.59
   6  -4  -3   42.87    1.14
   7  -4  -3    0.42    0.04
   8  -4  -3    0.33    0.05
  -8  -3  -3    2.26    0.11
  -3  -3  -3   22.05    1.04
  -2  -3  -3   16.53    0.86
   5  -3  -3    0.12    0.03
   6  -3  -3   18.59    0.75
   7  -3  -3    4.44    0.15
   8  -3  -3    1.08    0.07
  -6  -2  -3    1.11    0.08
  -2  -2  -3    1.50    0.09
   4  -2  -3   17.18    0.70
   5  -2  -3   16.98    0.67
   6  -2  -3    3.91    0.13
   7  -2  -3   14.45    0.41
   8  -2  -3    1.12    0.05
  -7  -1  -3    3.31    0.15
  -6  -1  -3   13.12    0.53
  -2  -1  -3   25.00    1.24
   4  -1  -3   61.36    2.42
   5  -1  -3    0.42    0.04
   6  -1  -3    4.46    0.15
   7  -1  -3    0.70    0.04
   8  -1  -3    0.82    0.04
  -8   0  -3    0.00    0.02
  -7   0  -3    0.07    0.03
  -6   0  -3   -0.01    0.03
   3   0  -3    0.04    0.01
   4   0  -3    0.01    0.01
   5   0  -3    0.03    0.02
   6   0  -3   -0.02    0.01
   7   0  -3   -0.01    0.02
   8   0  -3   -0.02    0.02
  -8   1  -3    8.20    0.34
  -7   1  -3    3.07    0.15
  -6   1  -3   14.35    0.54
   0   1  -3  332.96   19.63
   1   1  -3   17.34    1.04
   2   1  -3  107.65    6.35
   3   1  -3    1.66    0.09
   4   1  -3   59.59    1.80
   5   1  -3    0.38    0.04
   6   1  -3    4.89    0.15
   7   1  -3    0.72    0.07
   8   1  -3    0.84    0.05
  -8   2  -3    0.28    0.04
  -7   2  -3    2.97    0.13
  -6   2  -3    1.22    0.08
  -3   2  -3    2.36    0.16
  -2   2  -3    1.79    0.12
  -1   2  -3   14.57    0.87
   0   2  -3  978.44   57.15
   1   2  -3   11.08    0.64
   2   2  -3    0.29    0.04
   3   2  -3   17.72    0.82
   4   2  -3   17.62    0.52
   5   2  -3   16.27    0.74
   6   2  -3    4.15    0.19
   7   2  -3   15.20    0.60
   8   2  -3    1.17    0.08
  -8   3  -3    2.31    0.10
  -7   3  -3    5.07    0.20
  -6   3  -3    0.27    0.04
  -5   3  -3   41.38    1.69
  -3   3  -3   21.84    1.28
  -2   3  -3   18.40    1.06
  -1   3  -3   40.87    2.37
   1   3  -3   91.53    3.17
   2   3  -3   58.63    2.03
   3   3  -3    0.30    0.03
   4   3  -3    3.27    0.17
   5   3  -3    0.14    0.04
   6   3  -3   19.10    0.74
   7   3  -3    4.71    0.21
   8   3  -3    1.08    0.08
  -8   4  -3    1.16    0.06
  -7   4  -3    2.08    0.10
  -6   4  -3   14.69    0.56
  -5   4  -3    0.18    0.04
  -4   4  -3    0.05    0.03
  -2   4  -3   31.32    1.86
  -1   4  -3    8.45    0.30
   0   4  -3   51.03    1.81
   1   4  -3    0.18    0.02
   2   4  -3    8.48    0.31
   3   4  -3   11.94    0.43
   4   4  -3   52.18    2.35
   5   4  -3   13.50    0.64
   6   4  -3   40.46    1.64
   7   4  -3    0.38    0.06
   8   4  -3    0.31    0.05
  -7   5  -3    0.00    0.02
  -6   5  -3    4.69    0.15
  -5   5  -3    7.89    0.23
  -4   5  -3   19.11    0.75
  -2   5  -3    1.54    0.13
  -1   5  -3    2.22    0.07
   0   5  -3   55.34    1.56
   1   5  -3    0.09    0.02
   2   5  -3   40.23    1.41
   3   5  -3    6.57    0.24
   4   5  -3    1.47    0.10
   5   5  -3   37.25    1.64
   6   5  -3   11.76    0.51
   7   5  -3    4.11    0.19
  -7   6  -3    3.21    0.10
  -6   6  -3    0.75    0.05
  -5   6  -3    2.26    0.08
  -4   6  -3   27.27    1.04
  -3   6  -3    0.40    0.05
  -2   6  -3   81.52    4.89
  -1   6  -3   12.08    0.44
   0   6  -3    8.19    0.24
   1   6  -3    0.24    0.03
   2   6  -3   11.75    0.43
   3   6  -3    0.35    0.04
   4   6  -3    1.56    0.08
   5   6  -3   10.77    0.51
  -7   7  -3    8.83    0.34
  -6   7  -3   16.38    0.38
  -5   7  -3    0.42    0.04
  -4   7  -3   21.27    0.59
  -3   7  -3    9.09    0.36
  -2   7  -3    1.83    0.10
  -1   7  -3    1.26    0.12
   0   7  -3    1.19    0.06
   1   7  -3    0.54    0.05
   2   7  -3   13.10    0.48
   3   7  -3   21.60    0.75
   4   7  -3    0.92    0.08
  -6   8  -3    2.37    0.07
  -5   8  -3   16.36    0.37
  -4   8  -3    3.18    0.11
  -3   8  -3    3.13    0.11
  -2   8  -3   20.65    0.81
  -1   8  -3    6.16    0.27
   0   8  -3    4.77    0.33
   1   8  -3   12.33    0.82
   2   8  -3   17.10    0.63
   3   8  -3   22.66    1.06
   4   8  -3    2.45    0.09
  -6   9  -3    1.66    0.08
  -5   9  -3   14.68    0.41
  -4   9  -3    5.99    0.18
  -3   9  -3   27.71    0.76
  -2   9  -3   16.76    0.71
  -1   9  -3   12.31    0.53
   3   9  -3    0.19    0.03
   4   9  -3    9.23    0.28
   5   9  -3    0.14    0.03
  -4  10  -3    0.03    0.02
  -3  10  -3    1.03    0.08
  -2  10  -3    6.89    0.31
  -1  10  -3    0.06    0.03
   2  10  -3   44.58    1.65
   3  10  -3   22.88    0.68
   4  10  -3   12.43    0.37
   5  10  -3    1.68    0.08
  -3  11  -3    0.90    0.07
  -2  11  -3    4.02    0.19
  -1  11  -3    1.92    0.10
   1  11  -3   -0.01    0.03
   2  11  -3    6.21    0.25
   3  11  -3    2.15    0.08
   4  11  -3   42.45    1.23
   5  11  -3    0.19    0.03
  -2  12  -3    6.43    0.27
   0  12  -3    2.81    0.13
   1  12  -3    5.99    0.24
   2  12  -3    2.70    0.09
   3  12  -3    2.02    0.07
   4  12  -3    4.06    0.16
   0  13  -3    0.82    0.06
   1  13  -3    4.95    0.16
   2  13  -3    0.09    0.01
   3  13  -3    0.15    0.02
  -1 -13  -2    0.97    0.06
   0 -13  -2    1.39    0.07
   1 -13  -2    6.85    0.29
   2 -13  -2    0.19    0.03
  -1 -12  -2    5.16    0.24
   0 -12  -2   13.40    0.56
   1 -12  -2    4.21    0.20
   2 -12  -2    0.57    0.05
   3 -12  -2   14.99    0.43
   4 -12  -2    2.73    0.12
  -1 -11  -2    0.33    0.04
   0 -11  -2    5.10    0.24
   1 -11  -2    0.65    0.06
   2 -11  -2    2.80    0.15
   3 -11  -2    1.08    0.05
   4 -11  -2    0.74    0.04
   5 -11  -2    0.32    0.03
  -1 -10  -2   13.72    0.60
   0 -10  -2   59.46    2.50
   1 -10  -2   13.44    0.58
   2 -10  -2   29.98    1.24
   3 -10  -2   14.33    0.43
   4 -10  -2    5.87    0.18
   5 -10  -2    0.85    0.06
   6 -10  -2    5.91    0.24
  -1  -9  -2    1.71    0.08
   0  -9  -2    0.07    0.02
   1  -9  -2    1.39    0.09
   2  -9  -2    0.11    0.03
   3  -9  -2   42.34    1.20
   4  -9  -2    1.98    0.08
   5  -9  -2   42.98    1.57
   6  -9  -2    0.05    0.02
  -3  -8  -2   24.08    1.17
  -2  -8  -2    4.55    0.18
  -1  -8  -2   72.59    2.48
   0  -8  -2   13.84    0.51
   1  -8  -2   98.69    3.54
   3  -8  -2   64.17    2.60
   4  -8  -2    0.01    0.03
   5  -8  -2    6.18    0.19
   6  -8  -2    0.11    0.02
   7  -8  -2    1.00    0.04
  -4  -7  -2    0.21    0.05
  -3  -7  -2    0.22    0.04
  -2  -7  -2   46.49    2.06
  -1  -7  -2    2.16    0.10
   0  -7  -2  133.69    4.67
   1  -7  -2   17.58    0.67
   5  -7  -2   27.46    0.62
   6  -7  -2    0.02    0.02
   7  -7  -2    0.39    0.03
  -4  -6  -2   10.05    0.51
  -3  -6  -2   55.54    2.68
  -2  -6  -2   33.02    1.51
  -1  -6  -2   32.78    1.48
   0  -6  -2   63.36    2.27
   1  -6  -2   21.70    1.23
   5  -6  -2    0.15    0.03
   6  -6  -2   28.25    0.80
   7  -6  -2    0.06    0.03
   8  -6  -2    2.38    0.11
  -4  -5  -2    9.17    0.47
  -3  -5  -2    0.21    0.04
  -2  -5  -2    1.02    0.07
  -1  -5  -2    1.85    0.11
   1  -5  -2    8.12    0.53
   5  -5  -2    0.82    0.05
   6  -5  -2    8.96    0.19
   7  -5  -2    0.21    0.03
   8  -5  -2    0.16    0.03
  -8  -4  -2    3.27    0.15
  -4  -4  -2    0.91    0.07
  -3  -4  -2    0.18    0.03
  -2  -4  -2    4.49    0.24
  -1  -4  -2    0.36    0.04
   1  -4  -2   15.03    0.94
   5  -4  -2   34.08    1.34
   6  -4  -2   23.47    0.53
   7  -4  -2    7.88    0.24
   8  -4  -2    2.91    0.13
  -8  -3  -2   13.04    0.54
  -3  -3  -2    1.25    0.08
  -2  -3  -2   47.04    2.28
  -1  -3  -2   21.48    1.06
   1  -3  -2    3.23    0.20
   4  -3  -2    4.65    0.21
   5  -3  -2    3.05    0.15
   6  -3  -2   17.51    0.70
   7  -3  -2   43.51    1.19
   8  -3  -2    5.00    0.22
  -8  -2  -2    0.47    0.04
  -3  -2  -2   10.83    0.52
  -2  -2  -2    6.04    0.31
  -1  -2  -2  222.39   11.03
   4  -2  -2    0.05    0.02
   5  -2  -2   28.76    1.13
   6  -2  -2    0.20    0.03
   7  -2  -2    5.08    0.14
   8  -2  -2    0.85    0.04
  -6  -1  -2   15.97    0.66
  -2  -1  -2  125.16    6.28
   4  -1  -2    2.13    0.10
   5  -1  -2    1.33    0.08
   6  -1  -2   19.57    0.56
   7  -1  -2    7.64    0.19
   8  -1  -2   15.79    0.46
  -7   0  -2    5.04    0.23
  -6   0  -2  158.87    6.07
   3   0  -2   67.41    2.79
   4   0  -2    7.17    0.30
   5   0  -2    9.90    0.41
   6   0  -2   11.54    0.34
   7   0  -2    2.80    0.10
   8   0  -2    1.59    0.07
  -8   1  -2   14.08    0.57
  -7   1  -2   23.02    0.90
  -6   1  -2   17.77    0.67
   2   1  -2   12.13    0.69
   3   1  -2   21.05    0.64
   4   1  -2    2.01    0.07
   5   1  -2    1.34    0.07
   6   1  -2   19.66    0.56
   7   1  -2    8.25    0.24
   8   1  -2   16.55    0.55
  -8   2  -2    0.41    0.04
  -7   2  -2   16.54    0.62
  -6   2  -2    0.10    0.03
  -3   2  -2   10.35    0.63
  -2   2  -2    6.81    0.38
  -1   2  -2  242.25   13.42
   1   2  -2   96.97    5.34
   2   2  -2   18.36    0.65
   3   2  -2   96.88    2.56
   4   2  -2    0.17    0.02
   5   2  -2   28.47    0.84
   6   2  -2    0.27    0.03
   7   2  -2    5.39    0.24
   8   2  -2    1.04    0.07
  -8   3  -2   14.10    0.51
  -7   3  -2    3.48    0.15
  -6   3  -2    7.20    0.29
  -2   3  -2   49.07    2.77
  -1   3  -2   23.23    1.29
   0   3  -2  241.80   13.54
   1   3  -2    3.47    0.13
   2   3  -2  104.82    3.64
   3   3  -2   27.71    1.00
   4   3  -2    4.70    0.23
   5   3  -2    3.31    0.17
   6   3  -2   16.89    0.51
   7   3  -2   45.15    1.70
   8   3  -2    5.48    0.23
  -8   4  -2    3.47    0.14
  -7   4  -2    3.22    0.14
  -6   4  -2   14.98    0.57
  -5   4  -2   24.42    1.04
  -2   4  -2    4.74    0.29
  -1   4  -2    0.53    0.05
   0   4  -2   10.45    0.38
   1   4  -2   16.72    0.59
   2   4  -2    9.98    0.36
   3   4  -2    5.89    0.22
   4   4  -2   11.95    0.55
   5   4  -2   33.72    1.48
   6   4  -2   21.37    0.68
   7   4  -2    7.59    0.33
   8   4  -2    2.68    0.13
  -8   5  -2    2.82    0.12
  -7   5  -2    3.58    0.15
  -6   5  -2   13.07    0.51
  -5   5  -2   18.53    0.52
  -4   5  -2    9.35    0.39
  -2   5  -2    0.91    0.09
  -1   5  -2    1.73    0.08
   0   5  -2   42.66    1.54
   1   5  -2    9.35    0.34
   2   5  -2   34.10    1.20
   3   5  -2    2.65    0.11
   4   5  -2   22.34    0.81
   5   5  -2    0.65    0.08
   6   5  -2    8.23    0.37
   7   5  -2    0.18    0.04
  -7   6  -2    1.55    0.06
  -6   6  -2    0.95    0.07
  -5   6  -2    4.27    0.14
  -4   6  -2   10.66    0.42
  -3   6  -2   57.16    2.22
  -1   6  -2   30.87    1.80
   0   6  -2   60.55    2.13
   1   6  -2   20.77    0.76
   2   6  -2  116.28    4.10
   3   6  -2   70.80    3.08
   4   6  -2    0.00    0.03
   5   6  -2    0.11    0.05
  -7   7  -2   10.08    0.38
  -6   7  -2    0.30    0.03
  -5   7  -2   35.92    0.99
  -4   7  -2    0.04    0.02
  -3   7  -2    0.25    0.04
  -2   7  -2   43.00    1.71
  -1   7  -2    1.84    0.15
   1   7  -2   17.48    0.65
   2   7  -2   21.75    0.80
   3   7  -2    3.84    0.16
   4   7  -2    4.09    0.21
  -6   8  -2    1.05    0.04
  -5   8  -2    0.45    0.03
  -4   8  -2    0.07    0.02
  -3   8  -2   23.77    0.66
  -2   8  -2    4.26    0.20
  -1   8  -2   67.65    2.22
   0   8  -2   13.91    0.45
   1   8  -2   89.68    5.64
   2   8  -2    4.98    0.20
   3   8  -2   59.45    2.77
   4   8  -2    0.00    0.02
   5   8  -2    6.17    0.26
  -6   9  -2    0.40    0.04
  -5   9  -2    0.38    0.03
  -4   9  -2    1.31    0.06
  -3   9  -2   25.08    0.69
  -2   9  -2    0.32    0.05
  -1   9  -2    1.64    0.10
   0   9  -2    0.11    0.05
   3   9  -2   40.59    1.21
   4   9  -2    1.96    0.08
  -5  10  -2    1.25    0.05
  -4  10  -2    1.55    0.06
  -3  10  -2   11.14    0.46
  -2  10  -2    1.51    0.09
  -1  10  -2   13.77    0.57
   2  10  -2   29.39    1.11
   3  10  -2   14.35    0.44
   4  10  -2    5.80    0.19
   5  10  -2    0.75    0.05
  -4  11  -2    1.18    0.07
  -3  11  -2    0.30    0.05
  -2  11  -2    4.40    0.20
  -1  11  -2    0.41    0.05
   0  11  -2    4.80    0.21
   1  11  -2    0.64    0.06
   2  11  -2    2.97    0.10
   3  11  -2    1.10    0.05
   4  11  -2    0.71    0.04
   5  11  -2    0.28    0.03
  -2  12  -2    0.01    0.02
   1  12  -2    4.18    0.14
   2  12  -2    0.60    0.04
   3  12  -2   15.18    0.44
   4  12  -2    2.70    0.09
   0  13  -2    1.18    0.08
   1  13  -2    6.37    0.20
   2  13  -2    0.18    0.02
   3  13  -2    0.94    0.05
  -1 -13  -1    0.42    0.04
   0 -13  -1   35.31    1.44
   1 -13  -1    0.06    0.02
  -2 -12  -1    6.90    0.29
  -1 -12  -1    0.35    0.04
   0 -12  -1   18.34    0.74
   1 -12  -1    0.01    0.02
   2 -12  -1    0.27    0.04
   3 -12  -1    0.06    0.01
   4 -12  -1    0.84    0.05
  -2 -11  -1    5.58    0.24
  -1 -11  -1   30.39    1.30
   0 -11  -1    1.26    0.08
   1 -11  -1   18.53    0.76
   2 -11  -1    0.14    0.02
   3 -11  -1   34.97    1.01
   4 -11  -1    8.13    0.32
   5 -11  -1    3.48    0.15
  -2 -10  -1    0.09    0.03
  -1 -10  -1    0.58    0.06
   0 -10  -1    0.65    0.06
   1 -10  -1    2.41    0.13
   2 -10  -1   23.68    0.68
   3 -10  -1    0.22    0.03
   4 -10  -1   15.47    0.60
   5 -10  -1    0.29    0.04
   6 -10  -1    4.71    0.20
  -1  -9  -1    5.05    0.22
   0  -9  -1   20.29    0.78
   2  -9  -1    0.01    0.02
   3  -9  -1   36.83    1.08
   4  -9  -1    1.01    0.08
   5  -9  -1   16.18    0.61
   6  -9  -1    0.35    0.03
  -3  -8  -1   29.22    1.37
  -2  -8  -1   14.05    0.52
  -1  -8  -1    7.06    0.26
   0  -8  -1    2.85    0.12
   1  -8  -1    0.07    0.05
   4  -8  -1   61.03    2.32
   5  -8  -1    1.22    0.06
   6  -8  -1   10.62    0.30
   7  -8  -1    2.56    0.08
  -4  -7  -1    4.32    0.23
  -3  -7  -1   22.33    0.81
  -2  -7  -1    0.27    0.03
  -1  -7  -1    0.04    0.02
   0  -7  -1    7.81    0.30
   1  -7  -1    0.12    0.02
   4  -7  -1    6.52    0.29
   5  -7  -1   17.52    0.48
   6  -7  -1    1.76    0.07
   7  -7  -1    0.50    0.05
  -4  -6  -1    5.30    0.29
  -3  -6  -1    0.12    0.03
  -2  -6  -1    0.15    0.03
  -1  -6  -1    1.42    0.07
   0  -6  -1    6.79    0.26
   1  -6  -1    0.05    0.03
   4  -6  -1   27.08    1.09
   5  -6  -1    1.11    0.07
   6  -6  -1    2.01    0.07
   7  -6  -1    0.44    0.06
   8  -6  -1    0.34    0.04
  -8  -5  -1    0.72    0.05
  -4  -5  -1    3.71    0.21
  -3  -5  -1   13.09    0.65
  -2  -5  -1   57.88    2.71
  -1  -5  -1   72.67    3.35
   0  -5  -1    7.09    0.27
   1  -5  -1   70.00    4.24
   4  -5  -1    1.53    0.06
   5  -5  -1   32.60    0.93
   6  -5  -1    3.92    0.11
   7  -5  -1    4.89    0.16
   8  -5  -1    4.25    0.18
  -8  -4  -1    3.93    0.17
  -4  -4  -1    7.36    0.38
  -3  -4  -1   96.57    4.83
  -2  -4  -1   27.65    1.39
  -1  -4  -1   42.83    2.14
   2  -4  -1   41.09    2.77
   4  -4  -1    3.44    0.16
   5  -4  -1   33.31    0.95
   6  -4  -1    0.51    0.03
   7  -4  -1    3.80    0.13
   8  -4  -1    4.71    0.20
  -8  -3  -1    0.05    0.02
  -4  -3  -1    8.13    0.39
  -3  -3  -1    3.15    0.18
  -2  -3  -1    0.43    0.04
  -1  -3  -1    3.41    0.18
   1  -3  -1   59.77    3.51
   2  -3  -1    4.81    0.32
   4  -3  -1    1.27    0.07
   5  -3  -1    0.05    0.02
   6  -3  -1    2.67    0.08
   7  -3  -1    3.44    0.10
   8  -3  -1    0.21    0.02
  -8  -2  -1    5.12    0.23
  -3  -2  -1  132.59    6.32
  -2  -2  -1   61.88    2.98
  -1  -2  -1  175.41    9.88
   4  -2  -1    0.77    0.05
   5  -2  -1    0.98    0.06
   6  -2  -1   14.52    0.42
   7  -2  -1    0.15    0.03
   8  -2  -1    5.47    0.17
  -8  -1  -1    0.40    0.04
  -3  -1  -1  183.22    8.16
  -2  -1  -1  334.55   16.46
   3  -1  -1  115.82    4.90
   4  -1  -1    0.12    0.02
   5  -1  -1    8.78    0.37
   6  -1  -1   13.26    0.39
   7  -1  -1    0.21    0.02
   8  -1  -1   10.99    0.33
  -6   0  -1    0.02    0.03
   3   0  -1    0.07    0.02
   4   0  -1    0.19    0.03
   5   0  -1    0.02    0.02
   6   0  -1    0.00    0.02
   7   0  -1    0.04    0.02
   8   0  -1   -0.04    0.02
  -7   1  -1   14.11    0.58
  -6   1  -1    0.50    0.06
   2   1  -1    1.75    0.11
   3   1  -1  123.74    3.29
   4   1  -1    0.11    0.02
   5   1  -1    8.53    0.27
   6   1  -1   13.33    0.39
   7   1  -1    0.23    0.03
   8   1  -1   11.80    0.46
  -8   2  -1    5.32    0.22
  -7   2  -1    0.38    0.05
  -6   2  -1    1.02    0.07
  -2   2  -1   62.08    3.62
  -1   2  -1  209.10   12.02
   1   2  -1  192.61   10.74
   2   2  -1    0.46    0.03
   3   2  -1   23.52    0.63
   4   2  -1    0.76    0.04
   5   2  -1    0.94    0.05
   6   2  -1   14.78    0.42
   7   2  -1    0.09    0.04
   8   2  -1    5.95    0.25
  -8   3  -1    0.04    0.02
  -7   3  -1    0.29    0.04
  -6   3  -1   19.36    0.73
  -2   3  -1    0.50    0.05
  -1   3  -1    3.66    0.21
   0   3  -1   45.20    2.54
   1   3  -1   64.33    3.60
   2   3  -1    5.90    0.20
   3   3  -1    4.48    0.13
   4   3  -1    1.28    0.05
   5   3  -1    0.00    0.03
   6   3  -1    2.38    0.14
   7   3  -1    3.49    0.17
   8   3  -1    0.18    0.03
  -8   4  -1    4.12    0.16
  -7   4  -1    0.05    0.03
  -6   4  -1    6.01    0.25
  -2   4  -1   27.98    1.68
  -1   4  -1   44.56    2.60
   0   4  -1   67.91    3.87
   1   4  -1   39.95    1.40
   2   4  -1   52.36    1.72
   3   4  -1   80.10    2.80
   4   4  -1    3.67    0.15
   5   4  -1   33.60    1.47
   6   4  -1    0.46    0.04
   7   4  -1    3.68    0.18
   8   4  -1    4.43    0.20
  -8   5  -1    0.65    0.04
  -7   5  -1    5.81    0.24
  -6   5  -1   22.74    0.84
  -5   5  -1   29.17    0.82
  -4   5  -1    3.90    0.18
  -1   5  -1   72.94    4.07
   0   5  -1    6.67    0.26
   1   5  -1   75.45    2.63
   2   5  -1   21.25    0.76
   3   5  -1   66.96    2.32
   4   5  -1    1.45    0.08
   5   5  -1   32.70    1.44
  -7   6  -1    3.64    0.11
  -6   6  -1    1.15    0.07
  -5   6  -1    6.35    0.20
  -4   6  -1    5.49    0.24
  -3   6  -1    0.13    0.03
  -1   6  -1    1.32    0.11
   0   6  -1    6.90    0.42
   1   6  -1    0.11    0.02
   2   6  -1   24.68    0.89
   3   6  -1    1.05    0.06
   4   6  -1   27.02    0.97
   5   6  -1    1.20    0.09
  -7   7  -1    4.79    0.14
  -6   7  -1    6.89    0.19
  -5   7  -1    8.01    0.24
  -4   7  -1    4.04    0.13
  -3   7  -1   22.42    0.88
  -2   7  -1    0.22    0.04
  -1   7  -1   -0.01    0.03
   0   7  -1    7.52    0.47
   1   7  -1    0.10    0.04
   2   7  -1    3.75    0.15
   3   7  -1    4.40    0.18
   4   7  -1    6.24    0.31
   5   7  -1   16.64    0.71
  -7   8  -1    4.93    0.20
  -6   8  -1    1.95    0.07
  -5   8  -1    2.64    0.07
  -4   8  -1    3.42    0.10
  -3   8  -1   28.53    0.77
  -2   8  -1   13.84    0.38
  -1   8  -1    6.39    0.28
   0   8  -1    2.61    0.11
   1   8  -1    0.09    0.05
   2   8  -1    6.03    0.45
   3   8  -1    0.23    0.04
   4   8  -1   58.15    1.46
   5   8  -1    1.23    0.07
  -6   9  -1    6.42    0.18
  -5   9  -1   32.03    0.72
  -4   9  -1   23.76    0.53
  -3   9  -1    0.94    0.05
  -2   9  -1    1.37    0.07
  -1   9  -1    5.07    0.17
   0   9  -1   21.10    0.84
   3   9  -1   38.35    1.11
   4   9  -1    0.84    0.05
   5   9  -1   14.82    0.58
  -5  10  -1    5.29    0.13
  -4  10  -1    0.02    0.02
  -3  10  -1   23.94    0.66
  -2  10  -1    0.06    0.03
  -1  10  -1    0.68    0.06
   0  10  -1    0.64    0.05
   1  10  -1    2.15    0.12
   2  10  -1   23.08    0.90
   3  10  -1    0.19    0.03
   4  10  -1   14.89    0.45
   5  10  -1    0.25    0.04
  -4  11  -1    3.44    0.11
  -3  11  -1    6.69    0.29
  -2  11  -1    5.08    0.23
  -1  11  -1   29.74    1.24
   1  11  -1   17.31    0.68
   2  11  -1    0.26    0.03
   3  11  -1   36.60    1.04
   4  11  -1    7.60    0.24
   5  11  -1    3.38    0.14
  -2  12  -1    6.67    0.28
  -1  12  -1    0.27    0.04
   0  12  -1   17.21    0.82
   1  12  -1    0.00    0.02
   2  12  -1    0.28    0.03
   3  12  -1    0.07    0.02
   4  12  -1    0.85    0.05
   0  13  -1   32.10    1.60
   1  13  -1    0.03    0.01
   2  13  -1   16.33    0.48
   3  13  -1    0.20    0.02
  -1 -13   0    4.37    0.19
   0 -13   0    0.04    0.02
   1 -13   0    4.48    0.20
   2 -13   0    1.51    0.08
  -2 -12   0    0.13    0.02
  -1 -12   0    0.78    0.06
   0 -12   0   22.78    0.91
   1 -12   0    0.83    0.06
   2 -12   0    0.19    0.02
   3 -12   0    0.53    0.03
   4 -12   0    2.10    0.10
  -2 -11   0    0.04    0.02
  -1 -11   0    1.26    0.08
   0 -11   0    0.00    0.02
   1 -11   0    1.30    0.08
   2 -11   0    0.03    0.02
   3 -11   0    1.20    0.06
   4 -11   0    0.45    0.05
   5 -11   0    1.13    0.06
  -2 -10   0    9.77    0.43
  -1 -10   0    0.56    0.05
   0 -10   0   45.91    1.93
   1 -10   0    0.44    0.05
   2 -10   0    9.70    0.30
   3 -10   0    0.13    0.02
   4 -10   0   27.10    1.04
   5 -10   0    0.27    0.04
   6 -10   0    9.44    0.37
  -1  -9   0    2.38    0.12
   0  -9   0   -0.01    0.05
   1  -9   0    2.58    0.20
   3  -9   0   29.35    0.87
   4  -9   0    5.72    0.25
   5  -9   0   43.19    1.13
   6  -9   0    0.94    0.04
  -3  -8   0   29.40    1.42
  -2  -8   0    1.45    0.08
  -1  -8   0   19.71    0.70
   0  -8   0   13.05    0.48
   1  -8   0   18.46    1.09
   4  -8   0    0.17    0.04
   5  -8   0    0.77    0.05
   6  -8   0    2.61    0.09
   7  -8   0    0.05    0.02
  -4  -7   0    4.45    0.25
  -3  -7   0    5.81    0.23
  -2  -7   0    1.52    0.08
  -1  -7   0   51.91    1.80
   0  -7   0    0.01    0.02
   1  -7   0   43.99    2.79
   5  -7   0    3.96    0.13
   6  -7   0   16.60    0.47
   7  -7   0    1.68    0.09
  -8  -6   0    0.86    0.05
  -4  -6   0   24.47    1.17
  -3  -6   0    3.22    0.14
  -2  -6   0    4.13    0.16
  -1  -6   0    0.70    0.04
   0  -6   0   90.77    3.34
   1  -6   0    0.60    0.04
   2  -6   0    3.30    0.25
   4  -6   0   23.96    0.97
   5  -6   0    0.47    0.04
   6  -6   0   48.09    1.36
   7  -6   0    0.28    0.04
  -8  -5   0    8.32    0.34
  -5  -5   0    5.34    0.30
  -4  -5   0   42.70    2.02
  -3  -5   0   15.02    0.76
  -2  -5   0   30.63    1.48
  -1  -5   0    6.09    0.24
   0  -5   0    0.02    0.01
   1  -5   0    5.72    0.36
   2  -5   0   28.95    1.76
   4  -5   0   41.24    1.20
   5  -5   0    5.62    0.18
   6  -5   0   19.14    0.45
   7  -5   0    1.23    0.06
   8  -5   0    8.00    0.32
  -8  -4   0    0.77    0.05
  -5  -4   0   11.89    0.62
  -4  -4   0    3.11    0.18
  -3  -4   0    2.42    0.14
  -2  -4   0   50.18    2.48
  -1  -4   0    4.57    0.24
   0  -4   0   24.83    0.92
   1  -4   0    4.33    0.28
   2  -4   0   51.15    2.94
   4  -4   0    3.24    0.11
   5  -4   0   12.69    0.37
   6  -4   0   43.67    0.99
   7  -4   0   24.26    0.68
   8  -4   0    0.73    0.05
  -8  -3   0    0.16    0.03
  -4  -3   0    4.53    0.25
  -3  -3   0    4.61    0.25
  -2  -3   0    1.09    0.07
   0  -3   0    0.00    0.02
   1  -3   0   29.31    1.74
   2  -3   0    0.91    0.08
   4  -3   0    4.61    0.21
   5  -3   0   30.56    1.21
   6  -3   0   12.15    0.30
   7  -3   0    0.31    0.03
   8  -3   0    0.14    0.02
  -8  -2   0    0.22    0.03
  -4  -2   0    0.02    0.02
  -3  -2   0    0.09    0.02
  -2  -2   0    1.38    0.08
  -1  -2   0    0.71    0.04
   2  -2   0    1.35    0.09
   3  -2   0    0.03    0.01
   4  -2   0    0.02    0.02
   5  -2   0    1.38    0.08
   6  -2   0    3.09    0.09
   7  -2   0    4.24    0.12
   8  -2   0    0.21    0.03
  -8  -1   0    0.69    0.05
  -4  -1   0   39.31    1.82
  -3  -1   0  242.85   11.68
  -2  -1   0  151.58    7.60
   3  -1   0  222.37    9.69
   4  -1   0   37.96    1.51
   5  -1   0   48.58    1.89
   6  -1   0    0.19    0.03
   7  -1   0    8.63    0.26
   8  -1   0    0.72    0.06
  -8   0   0    0.04    0.02
  -7   0   0    1.12    0.08
  -3   0   0    0.05    0.01
   3   0   0    0.06    0.01
   4   0   0    3.57    0.16
   5   0   0    3.61    0.17
   6   0   0   10.33    0.31
   7   0   0    1.15    0.05
   8   0   0    0.10    0.03
  -7   1   0    7.81    0.34
   2   1   0  168.34    9.24
   3   1   0  244.47    6.75
   4   1   0   37.46    1.12
   5   1   0   46.16    1.89
   6   1   0    0.21    0.03
   7   1   0    8.75    0.28
   8   1   0    0.69    0.06
  -8   2   0    0.19    0.03
  -7   2   0    4.04    0.19
  -6   2   0    2.98    0.15
   0   2   0   -0.01    0.01
   1   2   0    0.78    0.06
   2   2   0    1.55    0.10
   3   2   0    0.09    0.01
   4   2   0    0.03    0.01
   5   2   0    1.34    0.06
   6   2   0    3.14    0.11
   7   2   0    4.46    0.20
   8   2   0    0.19    0.04
  -8   3   0    0.11    0.03
  -7   3   0    0.35    0.05
  -6   3   0   12.16    0.48
  -2   3   0    1.18    0.08
  -1   3   0   32.05    1.78
   0   3   0    0.05    0.03
   2   3   0    1.18    0.05
   3   3   0    4.87    0.14
   4   3   0    4.71    0.14
   5   3   0   29.69    0.90
   6   3   0   12.06    0.36
   7   3   0    0.39    0.06
   8   3   0    0.11    0.03
  -8   4   0    0.72    0.05
  -7   4   0   25.28    0.92
  -6   4   0   44.73    1.63
  -1   4   0    4.91    0.29
   0   4   0   25.46    1.46
   1   4   0    4.74    0.17
   2   4   0   52.69    1.82
   3   4   0    2.70    0.11
   4   4   0    3.34    0.10
   5   4   0   12.63    0.58
   6   4   0   39.97    1.70
   7   4   0   22.78    0.96
   8   4   0    0.65    0.05
  -8   5   0    8.28    0.32
  -7   5   0    1.29    0.05
  -6   5   0   19.84    0.75
  -4   5   0   39.93    1.67
  -1   5   0    6.22    0.37
   0   5   0    0.01    0.03
   1   5   0    6.12    0.23
   2   5   0   31.65    1.09
   3   5   0   15.75    0.56
   4   5   0   43.44    1.48
  -7   6   0    0.26    0.03
  -6   6   0   50.18    1.30
  -5   6   0    0.46    0.04
  -4   6   0   23.93    0.97
  -1   6   0    0.65    0.07
   0   6   0   92.19    5.31
   1   6   0    0.68    0.04
   2   6   0    3.86    0.15
   3   6   0    3.08    0.13
   4   6   0   24.02    0.86
   5   6   0    0.46    0.05
  -7   7   0    1.71    0.06
  -6   7   0   17.37    0.46
  -5   7   0    4.16    0.11
  -4   7   0    4.43    0.12
  -3   7   0    5.66    0.17
  -2   7   0    1.37    0.08
  -1   7   0   47.15    2.86
   0   7   0    0.02    0.03
   1   7   0   49.34    2.86
   2   7   0    1.36    0.07
   3   7   0    5.51    0.22
   4   7   0    4.68    0.17
   5   7   0    3.93    0.13
  -7   8   0    0.07    0.02
  -6   8   0    2.72    0.09
  -5   8   0    0.81    0.04
  -4   8   0    0.23    0.02
  -3   8   0   29.30    0.80
  -2   8   0    1.41    0.06
  -1   8   0   18.29    0.75
   0   8   0   12.00    0.42
   1   8   0   16.36    1.11
   2   8   0    1.02    0.12
   3   8   0   28.68    0.94
   4   8   0    0.19    0.02
   5   8   0    0.88    0.04
  -6   9   0    0.91    0.04
  -5   9   0   40.83    0.92
  -4   9   0    5.71    0.14
  -3   9   0   30.54    0.70
  -2   9   0    0.54    0.07
  -1   9   0    2.42    0.12
   0   9   0    0.08    0.02
   3   9   0   31.03    0.90
   4   9   0    5.64    0.18
   5   9   0   42.31    1.23
  -5  10   0    0.29    0.02
  -4  10   0   26.32    0.59
  -3  10   0    0.14    0.02
  -2  10   0    9.62    0.30
  -1  10   0    0.57    0.06
   0  10   0   46.14    1.84
   1  10   0    0.38    0.06
   2  10   0    9.87    0.30
   3  10   0    0.10    0.02
   4  10   0   26.32    0.78
   5  10   0    0.28    0.03
  -4  11   0    0.39    0.03
  -3  11   0    1.30    0.05
  -2  11   0    0.08    0.03
  -1  11   0    1.23    0.08
   0  11   0    0.04    0.02
   1  11   0    1.18    0.06
   2  11   0    0.05    0.02
   3  11   0    1.24    0.06
   4  11   0    0.43    0.03
   5  11   0    1.15    0.06
  -3  12   0    0.55    0.05
  -2  12   0    0.13    0.03
  -1  12   0    0.81    0.06
   0  12   0   20.10    1.01
   1  12   0    0.70    0.04
   2  12   0    0.10    0.02
   3  12   0    0.62    0.03
   4  12   0    2.04    0.07
   1  13   0    4.01    0.21
   2  13   0    1.40    0.05
   3  13   0    1.31    0.06
  -2 -13   1   16.62    0.69
  -1 -13   1    0.05    0.02
   0 -13   1   36.19    1.44
   1 -13   1    0.51    0.04
   2 -13   1   19.89    0.83
  -2 -12   1    0.25    0.04
  -1 -12   1    0.04    0.02
   0 -12   1   18.02    0.74
   1 -12   1    0.30    0.04
   2 -12   1    6.38    0.20
   3 -12   1    3.88    0.17
   4 -12   1    0.06    0.02
  -2 -11   1    0.10    0.03
  -1 -11   1   17.70    0.76
   0 -11   1    1.18    0.08
   1 -11   1   32.16    1.30
   2 -11   1    5.17    0.17
   3 -11   1    6.49    0.20
   4 -11   1    3.82    0.16
   5 -11   1    4.71    0.19
  -2 -10   1   22.98    1.00
  -1 -10   1    2.33    0.13
   0 -10   1    0.69    0.06
   1 -10   1    0.66    0.04
   2 -10   1    0.09    0.02
   3 -10   1   23.92    0.94
   4 -10   1    0.00    0.02
   5 -10   1    5.61    0.23
   6 -10   1    0.31    0.03
  -2  -9   1    0.03    0.02
  -1  -9   1    2.54    0.20
   1  -9   1    4.92    0.35
   2  -9   1    1.37    0.09
   3  -9   1    0.68    0.07
   4  -9   1   24.36    0.94
   5  -9   1   33.29    0.88
   6  -9   1    6.33    0.18
  -3  -8   1    0.20    0.04
  -2  -8   1    7.51    0.29
  -1  -8   1    0.11    0.03
   0  -8   1    2.87    0.20
   1  -8   1    5.81    0.41
   4  -8   1    3.69    0.12
   5  -8   1    2.61    0.09
   6  -8   1    1.84    0.07
   7  -8   1    4.97    0.20
  -4  -7   1    6.03    0.34
  -3  -7   1    4.42    0.19
  -2  -7   1    3.92    0.16
  -1  -7   1    0.09    0.02
   0  -7   1    7.53    0.29
   1  -7   1    0.05    0.04
   2  -7   1    0.30    0.06
   5  -7   1    8.07    0.24
   6  -7   1    6.60    0.20
   7  -7   1    4.70    0.20
  -8  -6   1    0.35    0.03
  -4  -6   1   28.76    1.32
  -3  -6   1    1.13    0.06
  -2  -6   1   25.63    0.93
  -1  -6   1    0.10    0.02
   0  -6   1    6.66    0.26
   1  -6   1    1.43    0.11
   2  -6   1    0.15    0.04
   4  -6   1    5.47    0.25
   5  -6   1    6.74    0.30
   6  -6   1    1.03    0.06
   7  -6   1    3.47    0.16
   8  -6   1    6.09    0.24
  -8  -5   1    4.36    0.18
  -5  -5   1   31.18    1.56
  -4  -5   1    1.36    0.10
  -3  -5   1   66.09    2.41
  -2  -5   1   21.09    0.79
  -1  -5   1   74.95    2.73
   0  -5   1    6.74    0.27
   1  -5   1   64.55    2.56
   2  -5   1   48.29    3.22
   3  -5   1   12.21    0.53
   4  -5   1    3.77    0.13
   5  -5   1   29.71    0.86
   6  -5   1   21.77    0.51
   7  -5   1    5.66    0.18
   8  -5   1    0.70    0.05
  -8  -4   1    5.15    0.21
  -5  -4   1   31.74    1.60
  -4  -4   1    3.44    0.20
  -3  -4   1   79.86    3.81
  -2  -4   1   50.17    2.34
  -1  -4   1   39.34    1.46
   0  -4   1   63.54    2.43
   2  -4   1   27.49    1.65
   3  -4   1   94.50    4.01
   4  -4   1    7.37    0.23
   5  -4   1   21.27    0.63
   6  -4   1    5.92    0.13
   7  -4   1    0.03    0.02
   8  -4   1    3.73    0.16
  -8  -3   1    0.27    0.04
  -5  -3   1    0.07    0.03
  -4  -3   1    1.25    0.08
  -3  -3   1    4.45    0.23
  -2  -3   1    5.39    0.28
  -1  -3   1   58.23    2.96
   0  -3   1   41.21    1.59
   1  -3   1    3.30    0.21
   2  -3   1    0.39    0.05
   3  -3   1    3.03    0.15
   4  -3   1    7.71    0.24
   5  -3   1    0.62    0.04
   6  -3   1   19.07    0.45
   7  -3   1    0.25    0.03
   8  -3   1    0.05    0.02
  -8  -2   1    5.61    0.24
  -4  -2   1    0.78    0.06
  -3  -2   1   23.58    1.14
  -2  -2   1    0.53    0.03
  -1  -2   1  179.01    8.84
   1  -2   1  214.80   11.74
   2  -2   1   56.20    3.54
   3  -2   1  124.21    5.25
   4  -2   1    1.54    0.08
   5  -2   1   22.75    0.90
   6  -2   1    0.94    0.04
   7  -2   1    0.43    0.04
   8  -2   1    5.48    0.23
  -8  -1   1   10.70    0.46
  -7  -1   1    0.22    0.04
  -4  -1   1    0.14    0.03
  -3  -1   1  124.77    4.34
  -2  -1   1    1.77    0.07
   2  -1   1  317.27   19.55
   3  -1   1  167.43    5.57
   4  -1   1  174.05    6.87
   5  -1   1   11.09    0.47
   6  -1   1    0.56    0.03
   7  -1   1   15.38    0.44
   8  -1   1    0.37    0.05
  -8   0   1   -0.06    0.02
  -7   0   1    0.00    0.03
  -3   0   1    0.04    0.02
  -2   0   1    0.03    0.01
   2   0   1    0.13    0.02
   3   0   1    0.04    0.01
   4   0   1    0.03    0.01
   5   0   1    0.03    0.02
   6   0   1    0.03    0.01
   7   0   1    0.06    0.03
   8   0   1    0.05    0.03
  -7   1   1    0.22    0.04
   1   1   1    6.42    0.38
   2   1   1  387.24   20.03
   3   1   1  169.31    5.05
   4   1   1  174.08    5.11
   5   1   1   11.45    0.47
   6   1   1    0.64    0.04
   7   1   1   14.90    0.44
   8   1   1    0.31    0.05
  -7   2   1    0.19    0.04
  -6   2   1   13.82    0.56
   1   2   1  233.04   12.04
   2   2   1   70.08    3.62
   3   2   1  135.30    3.49
   4   2   1    1.51    0.06
   5   2   1   21.77    0.90
   6   2   1    0.99    0.05
   7   2   1    0.35    0.05
   8   2   1    5.64    0.23
  -8   3   1    0.17    0.03
  -7   3   1    3.37    0.16
  -6   3   1    2.69    0.13
  -1   3   1   66.42    3.60
   0   3   1   47.33    2.54
   2   3   1    0.51    0.03
   3   3   1    3.51    0.10
   4   3   1    7.71    0.22
   5   3   1    0.61    0.04
   6   3   1   18.47    0.54
   7   3   1    0.21    0.04
   8   3   1    0.05    0.03
  -8   4   1    4.67    0.19
  -7   4   1    3.93    0.17
  -6   4   1    0.57    0.06
  -1   4   1   39.69    2.32
   0   4   1   71.71    3.87
   1   4   1   45.31    1.57
   2   4   1   30.49    1.02
   3   4   1  107.09    3.55
   4   4   1    7.64    0.28
   5   4   1   22.23    0.98
   6   4   1    5.15    0.26
   7   4   1    0.06    0.03
  -8   5   1    4.12    0.17
  -7   5   1    4.95    0.15
  -6   5   1    3.97    0.18
  -4   5   1    1.41    0.09
  -1   5   1   77.03    4.35
   0   5   1    7.61    0.43
   1   5   1   73.33    2.46
   2   5   1   60.17    2.00
   3   5   1   13.54    0.48
   4   5   1    3.85    0.16
   5   5   1   30.31    1.33
  -7   6   1    0.44    0.03
  -6   6   1    2.24    0.08
  -5   6   1    1.12    0.08
  -4   6   1   26.33    1.09
  -1   6   1    0.02    0.03
   0   6   1    6.83    0.42
   1   6   1    1.40    0.11
   2   6   1    0.14    0.03
   3   6   1    0.15    0.03
   4   6   1    5.30    0.21
   5   6   1    6.30    0.21
  -7   7   1    0.38    0.03
  -6   7   1    1.82    0.07
  -5   7   1   17.08    0.41
  -4   7   1    6.40    0.15
  -3   7   1    4.51    0.14
  -2   7   1    3.83    0.18
   0   7   1    6.98    0.47
   1   7   1    0.03    0.04
   2   7   1    0.27    0.04
   3   7   1   20.81    0.77
   4   7   1    3.92    0.15
   5   7   1    8.29    0.24
  -7   8   1    2.77    0.11
  -6   8   1   10.88    0.30
  -5   8   1    1.27    0.05
  -4   8   1   61.11    1.31
  -3   8   1    0.34    0.04
  -2   8   1    7.43    0.21
  -1   8   1    0.12    0.02
   0   8   1    2.49    0.10
   1   8   1    6.36    0.23
   2   8   1   11.64    0.81
   3   8   1   27.01    0.91
   4   8   1    3.60    0.10
   5   8   1    2.53    0.08
  -6   9   1    0.35    0.03
  -5   9   1   14.91    0.34
  -4   9   1    0.89    0.04
  -3   9   1   37.65    0.74
  -2   9   1    0.01    0.02
  -1   9   1    2.82    0.14
   0   9   1   21.12    0.84
   1   9   1    5.82    0.23
   2   9   1    1.46    0.10
   3   9   1    0.69    0.05
   4   9   1   23.78    0.57
   5   9   1   32.86    0.77
   6   9   1    6.24    0.25
  -5  10   1    0.22    0.02
  -4  10   1   14.82    0.34
  -3  10   1    0.20    0.02
  -2  10   1   23.71    0.55
  -1  10   1    2.33    0.09
   0  10   1    0.61    0.06
   1  10   1    0.58    0.04
   2  10   1    0.08    0.02
   3  10   1   23.69    0.71
   4  10   1    0.03    0.02
   5  10   1    5.19    0.16
  -4  11   1    7.73    0.22
  -3  11   1   35.27    0.97
  -2  11   1    0.20    0.04
  -1  11   1   17.37    0.72
   0  11   1    1.18    0.06
   1  11   1   30.77    0.91
   2  11   1    5.26    0.17
   3  11   1    6.63    0.21
   4  11   1    3.68    0.12
   5  11   1    4.62    0.18
  -3  12   1    0.18    0.03
  -2  12   1    0.24    0.04
  -1  12   1   -0.03    0.02
   0  12   1   16.77    0.53
   1  12   1    0.35    0.03
   2  12   1    6.43    0.20
   3  12   1    3.79    0.12
   4  12   1    0.07    0.01
   1  13   1    0.39    0.04
   2  13   1   19.63    0.58
  -2 -13   2    0.18    0.03
  -1 -13   2    6.86    0.29
   0 -13   2    1.37    0.08
   1 -13   2    1.00    0.06
   2 -13   2    1.67    0.08
  -3 -12   2   14.64    0.63
  -2 -12   2    0.59    0.05
  -1 -12   2    4.32    0.20
   0 -12   2   13.69    0.56
   1 -12   2    5.48    0.24
   2 -12   2    0.01    0.01
   3 -12   2   13.17    0.51
   4 -12   2    0.23    0.03
  -3 -11   2    1.19    0.07
  -2 -11   2    2.83    0.15
  -1 -11   2    0.67    0.06
   0 -11   2    5.27    0.24
   1 -11   2    0.38    0.03
   2 -11   2    4.16    0.14
   3 -11   2    0.38    0.05
   4 -11   2    1.23    0.07
   5 -11   2    2.85    0.12
  -3 -10   2   14.44    0.62
  -2 -10   2   28.35    1.23
  -1 -10   2   12.79    0.58
   0 -10   2   62.49    2.50
   1 -10   2   13.76    0.41
   2 -10   2    1.44    0.06
   3 -10   2   11.03    0.45
   4 -10   2    1.74    0.10
   5 -10   2    1.24    0.05
  -3  -9   2   43.37    1.76
  -2  -9   2    0.08    0.02
  -1  -9   2    1.28    0.09
   0  -9   2    0.04    0.05
   1  -9   2    1.94    0.11
   2  -9   2    0.20    0.04
   3  -9   2   24.40    0.99
   4  -9   2    1.31    0.06
   5  -9   2    0.29    0.03
   6  -9   2    0.37    0.03
  -7  -8   2    0.99    0.05
  -3  -8   2   61.02    2.38
  -2  -8   2    5.08    0.21
  -1  -8   2   99.69    3.55
   0  -8   2   13.49    0.79
   4  -8   2    0.02    0.02
   5  -8   2    0.46    0.04
   6  -8   2    1.00    0.05
   7  -8   2    2.29    0.10
  -4  -7   2    4.10    0.23
  -3  -7   2    3.75    0.16
  -2  -7   2   23.26    0.84
  -1  -7   2   18.61    0.67
   1  -7   2    1.74    0.15
   2  -7   2   41.72    2.45
   5  -7   2   35.65    0.97
   6  -7   2    0.26    0.03
   7  -7   2    9.63    0.38
  -8  -6   2    2.48    0.11
  -4  -6   2    0.01    0.02
  -3  -6   2   69.72    2.55
  -2  -6   2  117.01    4.26
  -1  -6   2   21.70    0.79
   0  -6   2   62.44    2.27
   1  -6   2   26.71    1.76
   2  -6   2   27.61    1.80
   4  -6   2   10.01    0.43
   5  -6   2    4.29    0.14
   6  -6   2    0.87    0.05
   7  -6   2    1.55    0.09
  -8  -5   2    0.25    0.03
  -5  -5   2    0.77    0.07
  -4  -5   2   23.03    1.10
  -3  -5   2    2.67    0.12
  -2  -5   2   33.94    1.25
  -1  -5   2    9.41    0.35
   0  -5   2   42.63    1.60
   1  -5   2    1.88    0.13
   2  -5   2    1.13    0.09
   3  -5   2    0.18    0.04
   4  -5   2    9.16    0.28
   5  -5   2   18.12    0.54
   6  -5   2   12.99    0.38
   7  -5   2    3.40    0.12
   8  -5   2    2.70    0.12
  -8  -4   2    3.15    0.14
  -5  -4   2   31.84    1.61
  -4  -4   2   11.98    0.60
  -3  -4   2    5.72    0.23
  -2  -4   2    9.81    0.37
  -1  -4   2   16.49    0.61
   0  -4   2    9.95    0.39
   1  -4   2    0.46    0.05
   2  -4   2    4.22    0.29
   3  -4   2    0.15    0.02
   4  -4   2    0.83    0.04
   5  -4   2   26.20    0.60
   6  -4   2   14.44    0.30
   7  -4   2    2.94    0.09
   8  -4   2    3.16    0.14
  -8  -3   2    5.41    0.23
  -5  -3   2    2.84    0.18
  -4  -3   2    4.67    0.25
  -3  -3   2   28.77    1.04
  -2  -3   2  103.21    3.78
  -1  -3   2    3.42    0.13
   0  -3   2  222.00    8.50
   1  -3   2   19.56    1.26
   2  -3   2   41.15    2.71
   3  -3   2    1.21    0.05
   4  -3   2    0.00    0.01
   5  -3   2   18.17    0.53
   6  -3   2    6.93    0.15
   7  -3   2    3.14    0.09
   8  -3   2   13.22    0.54
  -8  -2   2    1.03    0.07
  -5  -2   2   26.94    1.36
  -4  -2   2    0.11    0.03
  -3  -2   2   97.52    3.42
  -2  -2   2   18.41    1.05
  -1  -2   2   89.96    3.36
   0  -2   2   91.25    4.78
   1  -2   2  231.49   13.09
   2  -2   2    5.75    0.37
   3  -2   2    9.85    0.35
   4  -2   2    5.41    0.17
   5  -2   2   27.15    0.77
   6  -2   2    0.07    0.02
   7  -2   2   15.84    0.47
   8  -2   2    0.56    0.05
  -8  -1   2   16.09    0.65
  -7  -1   2    7.87    0.34
  -4  -1   2    1.96    0.12
  -3  -1   2   22.01    0.76
  -2  -1   2   11.59    0.42
   1  -1   2  509.52   31.90
   2  -1   2  127.96    7.47
   3  -1   2  171.08    5.60
   4  -1   2   19.26    0.80
   5  -1   2   94.01    2.68
   6  -1   2   17.15    0.35
   7  -1   2   23.49    0.68
   8  -1   2   15.29    0.60
  -8   0   2    1.54    0.09
  -7   0   2    2.62    0.14
  -3   0   2   73.75    3.66
  -2   0   2  152.29    5.33
  -1   0   2  216.63   11.21
   1   0   2   56.36    3.18
   2   0   2  748.11   42.20
   3   0   2   38.60    1.25
   4   0   2  308.51   12.24
   5   0   2   22.93    0.93
   6   0   2  163.86    3.18
   7   0   2    5.56    0.14
   8   0   2   32.92    1.30
  -8   1   2   15.94    0.65
  -7   1   2    7.87    0.23
  -2   1   2   12.12    0.62
   1   1   2  595.55   22.83
   2   1   2  138.59    5.35
   3   1   2  173.91    5.08
   4   1   2   20.09    0.80
   5   1   2   95.06    3.74
   6   1   2   17.22    0.35
   7   1   2   24.21    0.94
   8   1   2   14.97    0.60
  -7   2   2    5.05    0.16
  -6   2   2    0.20    0.04
   0   2   2   78.33    4.90
   2   2   2    6.50    0.23
   3   2   2   10.98    0.29
   4   2   2    5.47    0.17
   5   2   2   25.14    1.07
   6   2   2    0.07    0.02
   7   2   2   15.99    0.65
   8   2   2    0.53    0.05
  -7   3   2   38.99    1.61
  -6   3   2   16.35    0.65
   0   3   2  251.37   13.53
   1   3   2   24.19    1.29
   2   3   2   50.31    1.68
   3   3   2    1.27    0.05
   4   3   2    0.01    0.01
   5   3   2   17.90    0.74
   6   3   2    6.47    0.30
   7   3   2    3.25    0.16
   8   3   2   13.19    0.54
  -8   4   2    2.76    0.13
  -7   4   2    7.74    0.31
  -6   4   2   22.67    0.61
  -1   4   2   16.80    0.96
   0   4   2   11.31    0.62
   1   4   2    0.48    0.03
   2   4   2    4.88    0.18
   3   4   2    0.18    0.03
   4   4   2    0.89    0.05
  -8   5   2    0.26    0.03
  -7   5   2    0.18    0.03
  -6   5   2    9.12    0.25
  -1   5   2    9.38    0.55
   0   5   2   46.27    2.54
   1   5   2    1.81    0.08
   2   5   2    0.97    0.05
   3   5   2    0.20    0.03
   4   5   2    9.36    0.34
  -7   6   2    0.07    0.02
  -6   6   2   30.40    0.78
  -5   6   2    0.18    0.02
  -4   6   2    0.09    0.02
   0   6   2   63.16    3.62
   1   6   2   32.19    1.80
   2   6   2   32.28    1.11
   3   6   2   55.63    1.97
   4   6   2    9.56    0.37
   5   6   2    4.23    0.14
  -7   7   2    0.39    0.03
  -6   7   2    0.03    0.02
  -5   7   2   27.13    0.73
  -4   7   2    4.00    0.10
  -3   7   2    3.85    0.12
  -2   7   2   22.20    0.91
   0   7   2  118.63    7.43
   1   7   2    1.91    0.15
   2   7   2   39.75    2.50
   3   7   2    0.21    0.03
   4   7   2    0.07    0.02
   5   7   2   36.12    0.86
  -7   8   2    1.02    0.06
  -6   8   2    0.10    0.02
  -5   8   2    6.11    0.16
  -4   8   2    0.00    0.02
  -3   8   2   65.56    1.42
  -2   8   2    5.30    0.15
  -1   8   2   95.47    2.61
   0   8   2   12.70    0.45
   1   8   2   66.91    2.27
   2   8   2    3.50    0.28
   3   8   2   23.47    1.12
   4   8   2    0.04    0.01
   5   8   2    0.46    0.03
   6   8   2    0.97    0.06
  -6   9   2    0.03    0.01
  -5   9   2   40.00    0.93
  -4   9   2    1.98    0.06
  -3   9   2   42.63    0.82
  -2   9   2    0.11    0.02
  -1   9   2    1.38    0.05
   0   9   2    0.06    0.03
   1   9   2    1.76    0.10
   2   9   2    0.28    0.03
   3   9   2   25.13    0.74
   4   9   2    1.37    0.05
   5   9   2    0.37    0.03
   6   9   2    0.42    0.03
  -6  10   2    5.71    0.23
  -5  10   2    0.77    0.03
  -4  10   2    5.86    0.13
  -3  10   2   14.52    0.29
  -2  10   2   29.12    0.67
  -1  10   2   13.42    0.32
   0  10   2   59.53    1.47
   1  10   2   13.99    0.34
   2  10   2    1.57    0.07
   3  10   2   10.76    0.33
   4  10   2    1.71    0.07
   5  10   2    1.22    0.05
  -5  11   2    0.29    0.03
  -4  11   2    0.74    0.03
  -3  11   2    1.02    0.04
  -2  11   2    2.83    0.08
  -1  11   2    0.73    0.06
   0  11   2    4.89    0.17
   1  11   2    0.33    0.04
   2  11   2    4.25    0.14
   3  11   2    0.32    0.03
   4  11   2    1.18    0.05
   5  11   2    2.88    0.12
  -3  12   2   14.76    0.61
  -2  12   2    0.56    0.05
  -1  12   2    4.25    0.19
   0  12   2   11.87    0.53
   1  12   2    5.10    0.26
   2  12   2   -0.01    0.01
   3  12   2   12.82    0.38
   4  12   2    0.24    0.03
   1  13   2    0.86    0.06
   2  13   2    1.65    0.06
  -2 -13   3    0.10    0.02
  -1 -13   3    5.15    0.23
   0 -13   3    0.91    0.06
   1 -13   3    1.92    0.09
   2 -13   3    0.64    0.04
  -3 -12   3    1.83    0.10
  -2 -12   3    2.83    0.14
  -1 -12   3    6.14    0.27
   0 -12   3    3.10    0.15
   1 -12   3    1.75    0.07
   2 -12   3    6.26    0.19
   3 -12   3    7.78    0.31
  -3 -11   3    2.07    0.11
  -2 -11   3    5.85    0.28
  -1 -11   3    0.06    0.03
   0 -11   3   15.28    0.65
   1 -11   3    1.95    0.08
   2 -11   3    4.10    0.14
   3 -11   3    0.89    0.06
   4 -11   3    0.13    0.02
   5 -11   3    0.57    0.04
  -3 -10   3   22.54    0.97
  -2 -10   3   40.82    1.82
  -1 -10   3   20.60    0.90
   0 -10   3   56.94    2.36
   1 -10   3    0.06    0.02
   2 -10   3    6.98    0.22
   3 -10   3    1.03    0.07
   4 -10   3    0.03    0.02
   5 -10   3    2.46    0.08
  -3  -9   3    0.14    0.03
  -2  -9   3   19.74    0.89
  -1  -9   3    7.43    0.34
   0  -9   3    0.80    0.06
   1  -9   3   11.87    0.55
   3  -9   3   27.15    1.08
   4  -9   3    6.11    0.18
   5  -9   3   14.50    0.40
   6  -9   3    1.68    0.06
  -3  -8   3   23.48    0.75
  -2  -8   3   17.19    0.66
  -1  -8   3   14.47    0.81
   0  -8   3    4.86    0.33
   1  -8   3    6.26    0.40
   2  -8   3   17.66    1.17
   4  -8   3    3.31    0.11
   5  -8   3   15.84    0.45
   6  -8   3    2.65    0.12
   7  -8   3    0.01    0.01
  -7  -7   3    2.66    0.12
  -4  -7   3    0.72    0.07
  -3  -7   3   19.98    0.78
  -2  -7   3   13.47    0.50
  -1  -7   3    0.47    0.04
   0  -7   3    1.32    0.11
   1  -7   3    1.22    0.12
   2  -7   3    1.64    0.15
   5  -7   3    0.37    0.03
   6  -7   3   17.21    0.64
   7  -7   3    8.49    0.34
  -8  -6   3    0.23    0.03
  -4  -6   3    1.66    0.11
  -3  -6   3    0.24    0.03
  -2  -6   3   11.78    0.45
  -1  -6   3    0.25    0.03
   0  -6   3    9.03    0.51
   1  -6   3   12.86    0.74
   2  -6   3   80.52    4.78
   3  -6   3    0.38    0.05
   4  -6   3   25.35    1.06
   5  -6   3    2.09    0.09
   6  -6   3    0.77    0.05
   7  -6   3    3.07    0.14
  -8  -5   3   11.99    0.47
  -5  -5   3   35.54    1.78
  -4  -5   3    1.45    0.10
  -3  -5   3    6.28    0.25
  -2  -5   3   39.51    1.46
  -1  -5   3    0.09    0.02
   0  -5   3   57.65    2.10
   1  -5   3    1.98    0.15
   2  -5   3    1.85    0.13
   3  -5   3   20.79    0.89
   4  -5   3   18.21    0.77
   5  -5   3    7.74    0.35
   6  -5   3    4.82    0.16
   7  -5   3    0.02    0.03
  -8  -4   3    0.41    0.04
  -5  -4   3   13.58    0.70
  -4  -4   3   54.05    2.55
  -3  -4   3   12.00    0.59
  -2  -4   3    8.39    0.32
  -1  -4   3    0.13    0.02
   0  -4   3   49.68    1.88
   1  -4   3    9.01    0.50
   2  -4   3   31.75    1.82
   3  -4   3   12.46    0.75
   4  -4   3    0.10    0.02
   5  -4   3    0.17    0.02
   6  -4   3   14.04    0.29
   7  -4   3    1.84    0.06
  -8  -3   3    1.19    0.07
  -5  -3   3    0.15    0.02
  -4  -3   3    3.28    0.18
  -3  -3   3    0.30    0.02
  -2  -3   3   57.53    2.11
  -1  -3   3   89.91    3.29
   0  -3   3   82.15    4.77
   1  -3   3   43.09    2.32
   2  -3   3   17.03    1.03
   3  -3   3   20.36    0.71
   4  -3   3    2.89    0.10
   5  -3   3   42.54    0.98
   6  -3   3    0.28    0.02
   7  -3   3    4.40    0.12
   8  -3   3    2.37    0.11
  -9  -2   3    2.32    0.11
  -8  -2   3    1.33    0.08
  -7  -2   3   15.26    0.61
  -5  -2   3   15.90    0.68
  -4  -2   3   16.99    0.84
  -3  -2   3   18.64    0.65
  -2  -2   3    0.29    0.02
  -1  -2   3   10.53    0.40
   0  -2   3 1000.00   55.77
   1  -2   3   13.88    0.85
   2  -2   3    1.74    0.12
   3  -2   3    2.23    0.09
   4  -2   3   34.00    0.97
   5  -2   3    0.09    0.02
   6  -2   3    1.19    0.04
   7  -2   3    2.71    0.10
   8  -2   3    0.46    0.05
  -8  -1   3    0.92    0.07
  -7  -1   3    0.68    0.06
  -5  -1   3    0.49    0.05
  -4  -1   3   63.45    3.17
  -3  -1   3    1.69    0.07
  -2  -1   3  103.08    5.68
  -1  -1   3   17.63    0.86
   0  -1   3  359.73   19.17
   1  -1   3   49.53    2.95
   2  -1   3   26.65    1.48
   3  -1   3   69.34    2.21
   4  -1   3   20.59    0.60
   5  -1   3   33.14    0.73
   6  -1   3   13.80    0.28
   7  -1   3    3.30    0.09
   8  -1   3    8.82    0.36
  -8   0   3   -0.02    0.02
  -7   0   3    0.06    0.03
  -3   0   3    0.02    0.02
  -2   0   3    0.05    0.02
   1   0   3    0.02    0.02
   2   0   3    0.02    0.02
   3   0   3    0.00    0.01
   4   0   3    0.03    0.02
   5   0   3    0.03    0.01
   6   0   3    0.03    0.01
   7   0   3    0.02    0.02
   8   0   3    0.05    0.03
  -8   1   3    0.92    0.06
  -7   1   3    0.77    0.05
  -3   1   3    1.82    0.11
  -2   1   3  118.88    5.69
  -1   1   3   18.69    0.93
   0   1   3  325.65   19.15
   1   1   3   54.78    2.95
   2   1   3   26.19    1.48
   3   1   3   67.13    2.21
   4   1   3   20.57    0.83
   5   1   3   31.17    0.74
   6   1   3   13.43    0.32
   7   1   3    3.18    0.11
   8   1   3    8.80    0.36
  -8   2   3    1.14    0.07
  -7   2   3   14.10    0.41
  -1   2   3   11.39    0.57
   1   2   3   16.03    0.87
   2   2   3    1.63    0.05
   3   2   3    2.33    0.08
   4   2   3   33.87    1.36
   5   2   3    0.10    0.03
   6   2   3    1.12    0.06
   7   2   3    2.68    0.14
   8   2   3    0.40    0.04
  -7   3   3    4.17    0.14
  -6   3   3   16.88    0.70
   0   3   3   86.55    4.88
   1   3   3   38.92    1.43
   2   3   3   18.60    0.64
   3   3   3   22.81    0.77
   4   3   3    2.91    0.14
   6   3   3    0.22    0.04
   7   3   3    4.21    0.20
  -7   4   3    0.42    0.05
  -6   4   3   40.71    1.10
   0   4   3   55.05    2.99
   1   4   3    8.06    0.30
   2   4   3   32.80    1.13
   3   4   3   12.99    0.46
   4   4   3    0.04    0.03
  -8   5   3   11.22    0.44
  -7   5   3    4.19    0.18
  -6   5   3   12.21    0.34
  -5   5   3   35.29    1.37
  -4   5   3    1.28    0.08
   0   5   3   61.43    3.34
   1   5   3    2.32    0.16
   2   5   3    1.75    0.08
   3   5   3   22.33    0.77
   4   5   3   17.29    1.10
   5   5   3    7.66    0.31
   6   5   3    4.75    0.22
  -7   6   3    0.13    0.03
  -6   6   3   13.42    0.37
  -5   6   3   10.61    0.30
  -4   6   3    1.53    0.09
   0   6   3    8.16    0.51
   1   6   3   12.13    0.75
   2   6   3   85.25    2.95
   3   6   3    0.30    0.04
   4   6   3   24.86    1.15
   5   6   3    2.11    0.07
   6   6   3    0.73    0.06
  -7   7   3    2.68    0.08
  -6   7   3    5.95    0.17
  -5   7   3   31.19    0.84
  -4   7   3    0.66    0.03
  -3   7   3   21.72    0.58
  -2   7   3   12.94    0.54
   0   7   3    1.08    0.11
   1   7   3    1.28    0.12
   2   7   3    1.75    0.08
   3   7   3    7.93    0.32
   4   7   3   20.69    0.51
   5   7   3    0.42    0.03
   6   7   3   17.22    0.64
  -7   8   3    0.58    0.04
  -6   8   3    2.10    0.07
  -5   8   3   25.38    0.68
  -4   8   3    2.55    0.07
  -3   8   3   23.96    0.49
  -2   8   3   18.24    0.49
  -1   8   3   13.31    0.37
   0   8   3    4.98    0.15
   1   8   3    6.10    0.23
   2   8   3   22.57    0.78
   3   8   3    3.07    0.11
   4   8   3    3.25    0.09
   5   8   3   16.20    0.39
   6   8   3    2.45    0.11
  -6   9   3    1.46    0.05
  -5   9   3    0.12    0.02
  -4   9   3    8.91    0.19
  -3   9   3    0.11    0.02
  -2   9   3   20.99    0.42
  -1   9   3    7.67    0.19
   0   9   3    0.86    0.04
   1   9   3   13.16    0.40
   2   9   3   17.22    0.51
   3   9   3   27.17    0.66
   4   9   3    5.94    0.16
   5   9   3   14.66    0.35
   6   9   3    1.60    0.07
  -6  10   3    0.17    0.02
  -5  10   3    1.67    0.05
  -4  10   3   12.08    0.25
  -3  10   3   22.94    0.45
  -2  10   3   43.59    0.85
  -1  10   3   21.51    0.49
   0  10   3   57.07    1.64
   1  10   3    0.06    0.02
   2  10   3    7.48    0.23
   3  10   3    0.97    0.05
   4  10   3    0.01    0.01
   5  10   3    2.47    0.11
  -5  11   3    0.19    0.03
  -4  11   3   42.52    0.93
  -3  11   3    2.16    0.06
  -2  11   3    6.08    0.15
  -1  11   3    0.04    0.02
   0  11   3   14.91    0.62
   1  11   3    1.94    0.08
   2  11   3    4.26    0.14
   3  11   3    0.91    0.04
   4  11   3    0.11    0.02
   5  11   3    0.62    0.03
  -2  12   3    2.66    0.13
  -1  12   3    5.75    0.26
   0  12   3    2.73    0.13
   1  12   3    1.66    0.10
   2  12   3    6.34    0.20
   3  12   3    7.59    0.23
   4  12   3    5.63    0.22
   1  13   3    1.71    0.10
  -2 -13   4    0.27    0.03
  -1 -13   4    1.91    0.09
   0 -13   4    9.51    0.39
   1 -13   4    3.12    0.14
   2 -13   4    0.62    0.04
  -3 -12   4    0.91    0.06
  -2 -12   4    4.81    0.22
  -1 -12   4    0.42    0.04
   0 -12   4    7.95    0.34
   1 -12   4    1.51    0.06
   2 -12   4    1.74    0.09
   3 -12   4    1.66    0.08
  -3 -11   4    2.21    0.12
  -2 -11   4    3.32    0.17
  -1 -11   4    4.61    0.22
   0 -11   4    2.42    0.13
   1 -11   4    0.32    0.03
   2 -11   4    0.19    0.03
   3 -11   4    3.79    0.16
   4 -11   4    2.28    0.10
  -4 -10   4    0.07    0.03
  -3 -10   4    0.07    0.03
  -2 -10   4   11.77    0.53
  -1 -10   4   18.35    0.80
   0 -10   4   39.92    1.14
   1 -10   4    9.67    0.30
   2 -10   4   14.63    0.57
   3 -10   4    2.05    0.11
   4 -10   4    1.61    0.06
   5 -10   4    3.57    0.11
  -4  -9   4    2.50    0.12
  -3  -9   4    6.91    0.32
  -2  -9   4    9.27    0.44
  -1  -9   4   35.40    1.51
   0  -9   4    4.19    0.20
   1  -9   4   50.15    2.20
   2  -9   4   46.98    1.86
   3  -9   4    0.54    0.04
   4  -9   4    9.61    0.28
   5  -9   4    3.73    0.12
   6  -9   4    0.09    0.02
  -4  -8   4   18.11    0.70
  -3  -8   4    1.62    0.07
  -2  -8   4    7.09    0.29
  -1  -8   4    1.46    0.14
   0  -8   4    3.41    0.25
   1  -8   4    8.12    0.55
   2  -8   4    2.23    0.19
   4  -8   4   10.44    0.30
   5  -8   4   23.43    0.66
   6  -8   4   14.12    0.52
  -7  -7   4    0.15    0.02
  -4  -7   4    1.99    0.14
  -3  -7   4    2.85    0.13
  -2  -7   4   19.60    0.75
  -1  -7   4    9.70    0.58
   0  -7   4   24.83    1.39
   2  -7   4    0.07    0.05
   4  -7   4    8.38    0.21
   5  -7   4    8.51    0.26
   6  -7   4   22.25    0.80
   7  -7   4    0.03    0.02
  -8  -6   4    3.28    0.14
  -7  -6   4    6.76    0.30
  -4  -6   4    1.96    0.13
  -3  -6   4    0.58    0.05
  -2  -6   4    3.86    0.16
  -1  -6   4    0.20    0.03
   0  -6   4    8.52    0.48
   1  -6   4    0.69    0.08
   2  -6   4    1.14    0.06
   3  -6   4   12.20    0.53
   4  -6   4    0.59    0.07
   5  -6   4    5.94    0.18
   6  -6   4    2.90    0.10
   7  -6   4   14.02    0.54
  -8  -5   4    0.08    0.02
  -7  -5   4    0.56    0.05
  -5  -5   4    0.95    0.08
  -4  -5   4    0.76    0.07
  -3  -5   4   50.56    2.39
  -2  -5   4   10.25    0.39
  -1  -5   4   89.57    3.18
   0  -5   4   13.77    0.77
   1  -5   4   57.53    3.18
   2  -5   4    6.16    0.42
   3  -5   4   54.06    1.80
   4  -5   4    2.17    0.13
   5  -5   4   24.16    0.55
   6  -5   4    4.80    0.13
   7  -5   4    3.61    0.16
  -8  -4   4    3.39    0.15
  -7  -4   4    3.76    0.17
  -5  -4   4    8.07    0.42
  -4  -4   4   14.45    0.70
  -3  -4   4   21.88    0.78
  -2  -4   4   38.50    1.47
  -1  -4   4   36.32    1.34
   0  -4   4  144.78    7.74
   1  -4   4  121.98    6.48
   2  -4   4   25.18    1.63
   3  -4   4   48.04    1.64
   4  -4   4    4.41    0.15
   5  -4   4    0.80    0.04
   6  -4   4    4.40    0.12
   7  -4   4    0.38    0.03
  -8  -3   4    1.75    0.09
  -7  -3   4    3.39    0.16
  -5  -3   4    3.36    0.13
  -4  -3   4    1.09    0.05
  -3  -3   4   20.52    0.74
  -2  -3   4    0.09    0.02
  -1  -3   4    1.56    0.07
   0  -3   4  235.11   13.20
   1  -3   4    9.26    0.57
   2  -3   4   57.25    3.38
   3  -3   4   16.81    0.55
   4  -3   4    0.31    0.02
   5  -3   4    5.51    0.12
   6  -3   4   34.59    0.60
   7  -3   4    0.43    0.04
  -9  -2   4    1.22    0.06
  -8  -2   4    0.18    0.03
  -7  -2   4    4.40    0.20
  -5  -2   4   18.89    0.77
  -4  -2   4   21.45    0.75
  -3  -2   4   48.52    1.69
  -2  -2   4   91.69    3.35
  -1  -2   4  186.40    6.63
   0  -2   4  666.04   37.99
   1  -2   4   20.07    1.15
   2  -2   4   82.72    4.66
   3  -2   4    6.02    0.21
   4  -2   4    6.68    0.21
   5  -2   4    1.05    0.04
   6  -2   4    1.90    0.05
   7  -2   4    0.99    0.05
  -9  -1   4    0.82    0.05
  -8  -1   4    4.71    0.20
  -7  -1   4    7.11    0.30
  -5  -1   4   12.70    0.53
  -4  -1   4    0.19    0.04
  -3  -1   4    0.23    0.03
  -2  -1   4    1.79    0.07
  -1  -1   4  419.46   15.42
   0  -1   4  269.62   14.70
   1  -1   4   53.29    2.94
   2  -1   4    0.10    0.03
   3  -1   4  125.74    4.06
   4  -1   4    3.12    0.11
   5  -1   4   70.13    1.36
   6  -1   4   29.03    0.59
   7  -1   4   34.91    0.82
   8  -1   4    3.88    0.17
  -9   0   4    3.08    0.13
  -8   0   4    1.48    0.09
  -7   0   4    0.03    0.02
  -5   0   4   11.47    0.47
  -4   0   4    7.50    0.40
  -3   0   4   38.69    2.02
  -2   0   4   29.86    1.56
  -1   0   4  315.09   15.53
   0   0   4  234.38   13.25
   1   0   4  157.42    8.91
   2   0   4   50.61    1.66
   3   0   4    7.78    0.27
   4   0   4   14.03    0.37
   5   0   4   27.57    0.63
   6   0   4   17.78    0.37
   7   0   4   99.31    2.69
   8   0   4    6.92    0.27
  -8   1   4    4.32    0.19
  -7   1   4    6.68    0.20
  -1   1   4  443.71   21.97
   0   1   4  260.74   14.69
   1   1   4   50.50    2.94
   2   1   4    0.10    0.01
   3   1   4  127.06    4.06
   4   1   4    2.96    0.14
   5   1   4   68.37    1.88
   6   1   4   29.63    0.57
   7   1   4   35.48    0.95
   8   1   4    3.90    0.17
  -8   2   4    0.15    0.03
  -7   2   4    4.18    0.14
  -2   2   4   95.03    4.77
  -1   2   4  191.27    9.43
   0   2   4  700.10   38.90
   1   2   4   20.83    1.17
   3   2   4    6.03    0.25
   4   2   4    6.95    0.29
   5   2   4    0.96    0.04
   6   2   4    1.94    0.08
   7   2   4    0.97    0.05
  -8   3   4    1.63    0.09
  -7   3   4    3.28    0.11
   0   3   4  233.18   13.54
   1   3   4    9.95    0.58
   2   3   4   60.93    3.46
   6   3   4   31.32    1.37
   7   3   4    0.34    0.05
  -7   4   4    3.37    0.16
  -6   4   4   17.66    0.40
   0   4   4  138.08    7.92
   1   4   4  106.58    4.00
   2   4   4   29.88    1.01
   3   4   4   48.77    2.89
  -7   5   4    0.61    0.05
  -6   5   4    0.45    0.04
  -5   5   4    0.94    0.05
  -4   5   4    0.77    0.06
   0   5   4   13.31    0.78
   1   5   4   56.97    3.25
   2   5   4    7.13    0.26
   3   5   4   55.31    1.91
   5   5   4   23.16    0.66
   6   5   4    5.01    0.22
  -7   6   4    7.21    0.28
  -6   6   4    1.67    0.07
  -5   6   4   48.38    1.31
  -4   6   4    1.98    0.10
  -3   6   4    0.72    0.06
   0   6   4    7.28    0.47
   1   6   4    0.64    0.08
   2   6   4    1.10    0.11
   3   6   4   11.68    0.76
   4   6   4    0.64    0.06
   5   6   4    5.82    0.15
   6   6   4    2.95    0.10
  -7   7   4    0.19    0.03
  -6   7   4    0.74    0.04
  -5   7   4    2.06    0.08
  -4   7   4    2.12    0.06
  -3   7   4    3.04    0.10
  -2   7   4   19.95    0.55
  -1   7   4    9.25    0.39
   1   7   4    0.22    0.03
   2   7   4    0.02    0.02
   4   7   4    8.57    0.22
   5   7   4    8.54    0.22
   6   7   4   21.48    0.80
  -7   8   4    0.69    0.04
  -6   8   4    5.24    0.15
  -5   8   4    9.57    0.27
  -4   8   4   15.97    0.32
  -3   8   4    1.68    0.05
  -2   8   4    7.62    0.21
  -1   8   4    1.61    0.06
   0   8   4    3.56    0.11
   1   8   4    9.05    0.24
   2   8   4    2.39    0.09
   3   8   4   54.10    1.29
   4   8   4   10.45    0.26
   5   8   4   24.15    0.58
   6   8   4   13.42    0.52
  -6   9   4    0.89    0.04
  -5   9   4    0.43    0.03
  -4   9   4    2.10    0.06
  -3   9   4    7.10    0.15
  -2   9   4    9.93    0.20
  -1   9   4   36.36    0.70
   0   9   4    4.20    0.11
   1   9   4   53.40    1.59
   2   9   4   48.38    0.97
   3   9   4    0.45    0.03
   4   9   4    9.75    0.24
   5   9   4    4.00    0.12
   6   9   4    0.08    0.01
  -6  10   4    0.15    0.02
  -5  10   4    0.98    0.04
  -4  10   4    0.07    0.01
  -3  10   4    0.05    0.01
  -2  10   4   12.15    0.25
  -1  10   4   18.95    0.44
   0  10   4   40.18    0.91
   1  10   4    9.82    0.31
   2  10   4   14.17    0.43
   3  10   4    1.93    0.06
   4  10   4    1.58    0.05
   5  10   4    3.91    0.11
  -5  11   4    1.26    0.06
  -4  11   4    5.80    0.12
  -3  11   4    2.29    0.06
  -2  11   4    3.24    0.09
  -1  11   4    4.55    0.12
   0  11   4    2.46    0.12
   1  11   4    0.35    0.03
   2  11   4    0.20    0.02
   3  11   4    3.43    0.12
   4  11   4    2.11    0.06
  -2  12   4    4.68    0.14
  -1  12   4    0.37    0.04
   0  12   4    7.87    0.33
   1  12   4    1.44    0.06
   2  12   4    1.68    0.06
   3  12   4    1.56    0.06
  -1 -13   5    3.75    0.17
   0 -13   5    0.53    0.04
   1 -13   5    6.15    0.24
  -2 -12   5    0.04    0.02
  -1 -12   5    0.05    0.02
   0 -12   5    2.54    0.12
   1 -12   5    0.02    0.01
   2 -12   5    0.11    0.02
   3 -12   5    4.08    0.16
  -4 -11   5    0.07    0.02
  -3 -11   5    0.83    0.06
  -2 -11   5    0.05    0.02
  -1 -11   5    4.29    0.20
   0 -11   5   12.18    0.36
   1 -11   5    6.26    0.19
   2 -11   5    6.46    0.26
   3 -11   5    4.32    0.18
   4 -11   5    9.72    0.38
  -4 -10   5    6.68    0.30
  -3 -10   5   30.69    1.31
  -2 -10   5    0.50    0.05
  -1 -10   5    7.74    0.35
   0 -10   5    7.95    0.25
   1 -10   5    3.67    0.13
   2 -10   5    2.31    0.12
   3 -10   5   12.64    0.35
   4 -10   5   20.31    0.56
   5 -10   5    0.03    0.01
  -4  -9   5    0.04    0.02
  -3  -9   5    4.77    0.23
  -2  -9   5    3.66    0.18
  -1  -9   5   22.50    0.98
   0  -9   5   12.71    0.57
   1  -9   5   24.36    1.12
   2  -9   5   12.05    0.49
   3  -9   5    3.54    0.12
   4  -9   5   25.45    0.70
   5  -9   5    0.30    0.03
   6  -9   5    7.10    0.27
  -4  -8   5    1.17    0.08
  -3  -8   5   26.26    1.14
  -2  -8   5   -0.02    0.04
  -1  -8   5    0.05    0.05
   0  -8   5    1.69    0.15
   1  -8   5   11.06    0.72
   3  -8   5  109.21    2.95
   4  -8   5    0.42    0.04
   5  -8   5    7.94    0.23
   6  -8   5    0.47    0.05
  -4  -7   5    1.03    0.07
  -3  -7   5    0.49    0.06
  -2  -7   5    2.66    0.13
  -1  -7   5   10.48    0.64
   0  -7   5    2.64    0.19
   1  -7   5    0.20    0.06
   2  -7   5    0.36    0.08
   4  -7   5    1.82    0.06
   5  -7   5    0.11    0.03
   6  -7   5   13.21    0.49
   7  -7   5    6.21    0.24
  -7  -6   5    0.03    0.02
  -4  -6   5    0.47    0.05
  -3  -6   5    0.08    0.03
  -2  -6   5   34.45    1.28
  -1  -6   5   -0.02    0.03
   0  -6   5   33.06    1.72
   1  -6   5    6.64    0.25
   2  -6   5    0.63    0.05
   3  -6   5    1.93    0.09
   4  -6   5    8.05    0.37
   5  -6   5    5.80    0.18
   6  -6   5    0.03    0.02
   7  -6   5    1.21    0.07
  -8  -5   5    5.88    0.26
  -7  -5   5   11.25    0.48
  -5  -5   5    1.11    0.09
  -4  -5   5   35.26    1.68
  -3  -5   5   16.31    0.80
  -2  -5   5    3.62    0.15
  -1  -5   5    4.87    0.19
   0  -5   5   20.82    1.10
   1  -5   5   11.54    0.72
   2  -5   5   11.84    0.42
   3  -5   5    3.25    0.10
   4  -5   5    5.21    0.17
   5  -5   5    1.64    0.06
   6  -5   5    4.09    0.11
   7  -5   5    0.32    0.03
  -8  -4   5    0.01    0.02
  -7  -4   5    2.78    0.14
  -5  -4   5    6.80    0.23
  -4  -4   5    8.51    0.28
  -3  -4   5  163.19    5.73
  -2  -4   5   71.16    2.56
  -1  -4   5   15.21    0.57
   0  -4   5   57.02    3.01
   1  -4   5    7.62    0.50
   2  -4   5    0.22    0.05
   3  -4   5   30.42    1.01
   4  -4   5   22.56    0.66
   5  -4   5    9.28    0.22
   6  -4   5    9.45    0.23
   7  -4   5    0.92    0.05
  -8  -3   5    5.78    0.25
  -7  -3   5    4.89    0.22
  -5  -3   5   17.45    0.71
  -4  -3   5    0.47    0.03
  -3  -3   5   19.55    0.69
  -2  -3   5    2.89    0.12
  -1  -3   5    1.91    0.08
   0  -3   5    3.43    0.22
   1  -3   5   14.24    0.84
   2  -3   5    4.45    0.30
   3  -3   5   10.59    0.36
   4  -3   5    4.62    0.12
   5  -3   5   27.66    0.50
   6  -3   5    0.08    0.02
   7  -3   5    0.07    0.02
  -8  -2   5    0.21    0.03
  -7  -2   5    0.04    0.03
  -5  -2   5    8.92    0.38
  -4  -2   5    3.72    0.14
  -3  -2   5   25.48    0.91
  -2  -2   5    0.03    0.02
  -1  -2   5   22.23    0.81
   0  -2   5   59.10    3.13
   1  -2   5   40.93    2.27
   2  -2   5    9.60    0.58
   3  -2   5  139.12    4.42
   4  -2   5    0.57    0.02
   5  -2   5    6.05    0.12
   6  -2   5    5.71    0.13
   7  -2   5    0.02    0.02
  -9  -1   5    1.10    0.06
  -8  -1   5   45.14    1.69
  -7  -1   5   10.77    0.45
  -5  -1   5    6.99    0.30
  -4  -1   5   62.24    1.97
  -3  -1   5   29.05    1.55
  -2  -1   5   75.82    4.07
  -1  -1   5    0.09    0.02
   0  -1   5    6.03    0.35
   1  -1   5   10.72    0.58
   2  -1   5    4.87    0.17
   3  -1   5   37.84    1.24
   4  -1   5   10.77    0.29
   5  -1   5   11.50    0.21
   6  -1   5    2.07    0.06
   7  -1   5    0.54    0.03
   8  -1   5   15.00    0.59
  -9   0   5   -0.01    0.01
  -8   0   5    0.00    0.02
  -7   0   5    0.04    0.02
  -5   0   5    0.02    0.03
  -4   0   5    0.11    0.03
  -3   0   5    0.04    0.02
  -2   0   5    0.04    0.02
  -1   0   5    0.04    0.01
   0   0   5    0.01    0.02
   1   0   5    0.02    0.02
   2   0   5    0.03    0.01
   3   0   5    0.04    0.01
   4   0   5    0.02    0.01
   5   0   5    0.04    0.01
   6   0   5    0.01    0.01
   7   0   5    0.09    0.02
   8   0   5    0.01    0.02
  -8   1   5   42.18    1.15
  -7   1   5   10.49    0.30
  -5   1   5    6.80    0.30
  -4   1   5   59.76    3.20
  -3   1   5   31.11    1.55
  -2   1   5   79.18    4.07
  -1   1   5    0.12    0.02
   0   1   5    5.73    0.23
   1   1   5    9.01    0.58
   2   1   5    5.01    0.17
   3   1   5   38.24    1.24
   4   1   5   11.00    0.45
   5   1   5   11.46    0.27
   6   1   5    2.13    0.06
   7   1   5    0.58    0.04
  -8   2   5    0.29    0.04
  -7   2   5    0.10    0.02
  -4   2   5    3.61    0.17
  -3   2   5   26.51    1.35
  -2   2   5    0.05    0.03
  -1   2   5   22.77    1.15
   0   2   5   50.20    2.86
   1   2   5   39.65    2.27
   4   2   5    0.47    0.04
   5   2   5    6.15    0.25
   6   2   5    5.77    0.17
   7   2   5    0.02    0.01
  -8   3   5    5.30    0.24
  -7   3   5    4.87    0.16
  -6   3   5    2.54    0.14
   0   3   5    3.40    0.21
   1   3   5   14.18    0.85
   4   3   5    4.57    0.14
   5   3   5   27.92    0.74
   6   3   5    0.04    0.02
  -7   4   5    2.93    0.10
  -6   4   5    5.94    0.15
   0   4   5   49.52    3.07
   1   4   5    8.39    0.51
   2   4   5    0.17    0.04
   4   4   5   22.56    0.86
   5   4   5    9.01    0.22
  -7   5   5   11.14    0.45
  -6   5   5   15.06    0.34
  -5   5   5    1.27    0.06
  -4   5   5   33.41    1.29
   0   5   5   17.50    1.11
   1   5   5   12.02    0.72
   2   5   5   11.84    0.74
   3   5   5    3.13    0.15
   5   5   5    1.60    0.07
   6   5   5    4.06    0.13
  -7   6   5    0.07    0.02
  -6   6   5    9.14    0.26
  -5   6   5    7.13    0.21
  -4   6   5    0.43    0.05
  -3   6   5    0.13    0.02
   0   6   5   27.22    1.74
   1   6   5    6.18    0.43
   2   6   5    0.63    0.04
   3   6   5    1.93    0.06
   4   6   5    8.46    0.26
   5   6   5    5.59    0.17
   6   6   5    0.05    0.02
  -7   7   5    0.48    0.04
  -6   7   5    0.57    0.04
  -5   7   5    5.55    0.14
  -4   7   5    1.07    0.04
  -3   7   5    0.58    0.04
  -2   7   5    2.70    0.09
  -1   7   5   10.46    0.30
   0   7   5    2.39    0.12
   1   7   5    0.23    0.02
   2   7   5    0.38    0.03
   3   7   5    4.82    0.16
   4   7   5    1.98    0.06
   5   7   5    0.08    0.02
   6   7   5   12.77    0.49
  -7   8   5    0.05    0.02
  -6   8   5    4.31    0.13
  -5   8   5    4.99    0.13
  -4   8   5    1.11    0.04
  -3   8   5   27.37    0.54
  -2   8   5    0.04    0.02
  -1   8   5    0.15    0.03
   0   8   5    1.67    0.06
   1   8   5   12.04    0.31
   2   8   5    0.17    0.02
   3   8   5  110.77    2.60
   4   8   5    0.52    0.03
   5   8   5    8.18    0.23
   6   8   5    0.41    0.04
  -6   9   5    4.14    0.17
  -5   9   5   25.93    0.58
  -4   9   5    0.03    0.01
  -3   9   5    4.98    0.11
  -2   9   5    3.73    0.09
  -1   9   5   23.35    0.46
   0   9   5   13.26    0.27
   1   9   5   27.00    0.54
   2   9   5   11.97    0.25
   3   9   5    3.45    0.10
   4   9   5   25.98    0.62
   5   9   5    0.36    0.03
  -5  10   5    1.14    0.04
  -4  10   5    6.78    0.14
  -3  10   5   30.97    0.61
  -2  10   5    0.58    0.03
  -1  10   5    7.72    0.16
   0  10   5    8.18    0.20
   1  10   5    3.82    0.13
   2  10   5    2.20    0.07
   3  10   5   12.32    0.30
   4  10   5   20.59    0.49
   5  10   5    0.02    0.01
  -5  11   5    2.54    0.11
  -4  11   5    0.03    0.01
  -3  11   5    0.76    0.03
  -2  11   5    0.02    0.01
  -1  11   5    4.06    0.11
   0  11   5   12.07    0.50
   1  11   5    6.11    0.20
   2  11   5    6.17    0.19
   3  11   5    4.09    0.11
   4  11   5    9.48    0.27
  -3  12   5   14.94    0.58
  -2  12   5    0.02    0.01
  -1  12   5    0.05    0.02
   0  12   5    2.41    0.12
   1  12   5    0.01    0.02
   2  12   5    0.16    0.03
   3  12   5    3.64    0.12
  -2 -12   6    0.11    0.02
  -1 -12   6    4.97    0.22
   0 -12   6    0.53    0.03
   1 -12   6    0.17    0.02
   2 -12   6    0.02    0.02
   3 -12   6    0.25    0.03
  -4 -11   6    0.62    0.05
  -3 -11   6    0.05    0.02
  -2 -11   6    0.11    0.03
  -1 -11   6    0.00    0.02
   0 -11   6    1.46    0.06
   1 -11   6    1.92    0.07
   2 -11   6    0.14    0.03
   3 -11   6    0.44    0.04
   4 -11   6    0.04    0.01
  -4 -10   6    0.56    0.05
  -3 -10   6    0.46    0.05
  -2 -10   6    3.20    0.16
  -1 -10   6    2.01    0.08
   0 -10   6    0.57    0.04
   1 -10   6    8.10    0.25
   2 -10   6    0.70    0.06
   3 -10   6    9.78    0.27
   4 -10   6    1.96    0.07
   5 -10   6    0.73    0.04
  -4  -9   6    6.22    0.29
  -3  -9   6   18.52    0.79
  -2  -9   6    0.28    0.05
  -1  -9   6    5.05    0.16
   0  -9   6   62.64    1.79
   1  -9   6    0.59    0.06
   2  -9   6    3.10    0.10
   3  -9   6    0.06    0.02
   4  -9   6   20.43    0.57
   5  -9   6   18.30    0.71
  -4  -8   6    0.06    0.03
  -3  -8   6    2.55    0.13
  -2  -8   6   36.13    1.58
  -1  -8   6   17.70    1.17
   3  -8   6    0.29    0.04
   4  -8   6    4.69    0.13
   5  -8   6    3.52    0.15
   6  -8   6   10.75    0.41
  -4  -7   6    4.09    0.21
  -3  -7   6    1.02    0.08
  -2  -7   6    5.32    0.38
  -1  -7   6    1.99    0.16
   0  -7   6   44.89    2.52
   1  -7   6    1.57    0.15
   2  -7   6    1.58    0.08
   3  -7   6    5.82    0.28
   4  -7   6    0.07    0.02
   5  -7   6    0.09    0.03
   6  -7   6    0.28    0.04
  -4  -6   6    0.12    0.04
  -3  -6   6   10.47    0.53
  -2  -6   6    2.38    0.11
  -1  -6   6    0.83    0.09
   0  -6   6    5.38    0.20
   1  -6   6    2.82    0.12
   2  -6   6    1.31    0.07
   3  -6   6    0.09    0.03
   4  -6   6    3.43    0.12
   5  -6   6    3.22    0.09
   6  -6   6    0.62    0.04
   7  -6   6    0.08    0.02
  -8  -5   6    0.25    0.03
  -7  -5   6   13.09    0.58
  -4  -5   6    0.98    0.05
  -3  -5   6   12.68    0.41
  -2  -5   6    6.19    0.25
  -1  -5   6    7.83    0.47
   0  -5   6    8.54    0.48
   1  -5   6    0.99    0.06
   2  -5   6    0.09    0.03
   3  -5   6   61.15    1.52
   4  -5   6    6.19    0.16
   5  -5   6   42.69    0.97
   6  -5   6   12.47    0.30
   7  -5   6    5.27    0.22
  -8  -4   6    0.36    0.04
  -7  -4   6    3.35    0.16
  -6  -4   6    5.30    0.17
  -5  -4   6    5.34    0.24
  -4  -4   6    2.58    0.10
  -3  -4   6    5.25    0.15
  -2  -4   6   93.56    3.32
  -1  -4   6    0.37    0.05
   0  -4   6  411.26   21.48
   1  -4   6   29.08    1.68
   2  -4   6   53.94    1.86
   3  -4   6    9.67    0.26
   4  -4   6    2.06    0.07
   5  -4   6    0.07    0.01
   6  -4   6    4.05    0.11
   7  -4   6    2.17    0.11
  -8  -3   6    0.03    0.02
  -7  -3   6   14.77    0.62
  -6  -3   6   34.30    0.98
  -5  -3   6   14.76    0.62
  -4  -3   6    2.82    0.09
  -3  -3   6   27.05    0.95
  -2  -3   6    5.86    0.22
  -1  -3   6    2.39    0.10
   0  -3   6  431.43   23.96
   1  -3   6    5.30    0.32
   2  -3   6    9.58    0.59
   3  -3   6    0.02    0.02
   4  -3   6    8.74    0.21
   5  -3   6   18.71    0.38
   6  -3   6    2.19    0.07
   7  -3   6    3.27    0.15
  -8  -2   6    0.14    0.03
  -7  -2   6    3.31    0.16
  -6  -2   6    3.45    0.12
  -5  -2   6    0.03    0.03
  -4  -2   6   10.12    0.34
  -3  -2   6    2.27    0.14
  -2  -2   6   19.41    0.94
  -1  -2   6   12.88    0.72
   0  -2   6  116.51    6.40
   1  -2   6   10.48    0.60
   2  -2   6   17.93    1.06
   3  -2   6    0.24    0.02
   4  -2   6    3.87    0.08
   5  -2   6    5.40    0.11
   6  -2   6   13.81    0.28
   7  -2   6    0.81    0.06
  -8  -1   6    4.22    0.18
  -7  -1   6   14.11    0.39
  -6  -1   6    3.34    0.17
  -5  -1   6    0.14    0.03
  -4  -1   6    6.68    0.22
  -3  -1   6    4.32    0.24
  -2  -1   6   31.03    1.60
  -1  -1   6    0.24    0.03
   0  -1   6   30.63    1.68
   2  -1   6    6.25    0.22
   3  -1   6    3.91    0.14
   4  -1   6    0.08    0.01
   5  -1   6   11.13    0.19
   6  -1   6    0.32    0.03
   7  -1   6    0.21    0.02
  -8   0   6    3.13    0.10
  -7   0   6    1.12    0.06
  -5   0   6   75.84    3.08
  -4   0   6   16.35    0.53
  -3   0   6   59.67    3.10
  -2   0   6   14.48    0.77
  -1   0   6    0.02    0.01
   0   0   6   57.18    3.24
   1   0   6    4.88    0.30
   2   0   6   19.81    1.15
   3   0   6    5.90    0.21
   4   0   6    0.55    0.03
   5   0   6   24.83    0.49
   6   0   6   14.40    0.41
   7   0   6    6.35    0.19
  -8   1   6    3.84    0.12
  -7   1   6   13.79    0.39
  -5   1   6    0.02    0.03
  -4   1   6    6.36    0.22
  -3   1   6    4.38    0.25
  -2   1   6   30.70    1.60
  -1   1   6    0.19    0.03
   0   1   6   28.88    1.13
   2   1   6    6.59    0.39
   3   1   6    3.72    0.25
   4   1   6    0.05    0.01
   5   1   6   11.16    0.22
   6   1   6    0.27    0.03
   7   1   6    0.21    0.02
  -8   2   6    0.15    0.02
  -7   2   6    3.35    0.11
  -6   2   6    3.15    0.16
  -4   2   6    9.62    0.42
  -3   2   6    2.46    0.15
  -2   2   6   19.68    1.02
  -1   2   6   12.39    0.66
   0   2   6  110.07    6.39
   1   2   6   10.29    0.59
   2   2   6   19.17    1.06
   4   2   6    3.62    0.12
   5   2   6    5.06    0.13
   6   2   6   13.43    0.31
   7   2   6    0.79    0.04
  -8   3   6    0.07    0.02
  -7   3   6   14.87    0.42
  -6   3   6   33.72    0.94
  -4   3   6    2.52    0.14
   4   3   6    8.44    0.25
   5   3   6   18.12    0.41
   6   3   6    2.07    0.11
   7   3   6    3.13    0.13
  -8   4   6    0.36    0.04
  -7   4   6    3.63    0.12
  -6   4   6    5.45    0.17
   3   4   6    9.15    0.39
   4   4   6    2.06    0.07
   5   4   6    0.09    0.01
   6   4   6    4.21    0.18
  -7   5   6   14.19    0.58
  -6   5   6    1.21    0.05
  -5   5   6   31.89    0.91
  -4   5   6    0.90    0.07
   0   5   6    6.39    0.47
   1   5   6    0.86    0.09
   3   5   6   58.44    1.61
   4   5   6    6.44    0.14
   5   5   6   42.35    0.95
   6   5   6   13.07    0.49
  -7   6   6    0.26    0.04
  -6   6   6    3.67    0.12
  -5   6   6   42.55    0.84
  -4   6   6    0.16    0.03
  -3   6   6   10.49    0.41
   1   6   6    2.62    0.11
   2   6   6    1.20    0.05
   3   6   6    0.12    0.02
   4   6   6    3.42    0.08
   5   6   6    3.18    0.11
   6   6   6    0.53    0.05
  -7   7   6   11.90    0.47
  -6   7   6    1.16    0.05
  -5   7   6    3.79    0.10
  -4   7   6    4.31    0.11
  -3   7   6    1.07    0.07
  -2   7   6    5.79    0.17
  -1   7   6    1.91    0.07
   0   7   6   42.60    1.19
   1   7   6    1.51    0.05
   2   7   6    1.46    0.05
   3   7   6    6.12    0.12
   4   7   6    0.01    0.01
   5   7   6    0.10    0.02
   6   7   6    0.19    0.02
  -6   8   6   14.83    0.40
  -5   8   6    8.99    0.22
  -4   8   6    0.08    0.02
  -3   8   6    2.46    0.06
  -2   8   6   38.52    0.74
  -1   8   6   20.92    0.55
   0   8   6   47.84    1.29
   1   8   6    5.21    0.12
   2   8   6    7.06    0.12
   3   8   6    0.15    0.02
   4   8   6    4.92    0.13
   5   8   6    3.41    0.11
   6   8   6   10.86    0.41
  -6   9   6    1.46    0.07
  -5   9   6    1.38    0.05
  -4   9   6    6.59    0.16
  -3   9   6   18.32    0.37
  -2   9   6    0.35    0.02
  -1   9   6    4.90    0.10
   0   9   6   63.26    1.10
   1   9   6    0.65    0.03
   2   9   6    3.12    0.08
   3   9   6    0.06    0.01
   4   9   6   21.14    0.50
   5   9   6   19.07    0.52
  -5  10   6    0.68    0.03
  -4  10   6    0.64    0.03
  -3  10   6    0.37    0.03
  -2  10   6    3.01    0.07
  -1  10   6    1.92    0.05
   0  10   6    0.65    0.03
   1  10   6    8.32    0.18
   2  10   6    0.67    0.03
   3  10   6    9.58    0.24
   4  10   6    2.06    0.07
   5  10   6    0.77    0.04
  -4  11   6    0.69    0.03
  -3  11   6    0.08    0.01
  -2  11   6    0.13    0.01
  -1  11   6    0.03    0.01
   0  11   6    1.55    0.06
   1  11   6    1.93    0.07
   2  11   6    0.17    0.01
   3  11   6    0.35    0.02
   4  11   6    0.04    0.01
  -2  12   6    0.11    0.02
  -1  12   6    4.81    0.14
   0  12   6    0.50    0.04
   2  12   6    0.02    0.01
  -3 -12   7    1.83    0.09
  -2 -12   7   15.74    0.70
  -1 -12   7    2.63    0.14
   0 -12   7    1.22    0.05
   1 -12   7    0.26    0.03
   2 -12   7    7.65    0.31
  -4 -11   7    4.99    0.23
  -3 -11   7    1.38    0.08
  -2 -11   7    0.26    0.04
  -1 -11   7    0.11    0.02
   0 -11   7    0.27    0.03
   1 -11   7    0.03    0.02
   2 -11   7   11.24    0.44
   3 -11   7   15.34    0.59
  -4 -10   7    4.10    0.20
  -3 -10   7    0.19    0.03
  -2 -10   7    7.24    0.32
  -1 -10   7    3.09    0.11
   0 -10   7    2.06    0.08
   1 -10   7    4.99    0.21
   2 -10   7    0.78    0.04
   3 -10   7    0.20    0.02
   4 -10   7    0.44    0.03
  -5  -9   7    8.63    0.37
  -4  -9   7    0.98    0.07
  -3  -9   7    1.22    0.08
  -2  -9   7    1.88    0.11
  -1  -9   7    1.08    0.05
   0  -9   7    0.56    0.04
   1  -9   7    1.99    0.11
   2  -9   7    0.35    0.04
   3  -9   7    1.42    0.06
   4  -9   7    1.04    0.05
   5  -9   7    4.37    0.18
  -5  -8   7    0.66    0.05
  -4  -8   7    0.62    0.05
  -3  -8   7   30.10    1.25
  -2  -8   7    1.08    0.08
  -1  -8   7    0.63    0.06
   0  -8   7   22.50    1.01
   1  -8   7    0.02    0.02
   2  -8   7   14.31    0.32
   3  -8   7    2.22    0.07
   4  -8   7    1.90    0.07
   5  -8   7   12.27    0.46
   6  -8   7    2.83    0.12
  -5  -7   7   70.36    2.87
  -4  -7   7   11.75    0.50
  -3  -7   7   43.94    1.40
  -2  -7   7    0.20    0.07
  -1  -7   7    0.05    0.05
   0  -7   7    0.03    0.05
   1  -7   7    7.89    0.29
   2  -7   7   11.54    0.50
   3  -7   7    2.77    0.08
   4  -7   7    7.98    0.24
   5  -7   7   10.07    0.39
   6  -7   7    6.82    0.27
  -5  -6   7    1.26    0.08
  -4  -6   7    5.13    0.18
  -3  -6   7    0.29    0.05
  -2  -6   7    0.35    0.04
  -1  -6   7   14.11    0.49
   0  -6   7    8.27    0.30
   1  -6   7    0.04    0.02
   2  -6   7    2.19    0.10
   3  -6   7    9.64    0.29
   4  -6   7   11.28    0.27
   5  -6   7    0.17    0.02
   6  -6   7    4.54    0.14
  -8  -5   7    0.40    0.03
  -7  -5   7    5.41    0.25
  -5  -5   7    0.09    0.02
  -4  -5   7    0.94    0.05
  -3  -5   7    0.31    0.03
  -2  -5   7    2.53    0.09
  -1  -5   7    1.43    0.07
   0  -5   7   18.58    0.65
   1  -5   7   46.39    1.59
   2  -5   7   34.31    0.87
   3  -5   7   45.67    0.97
   4  -5   7   21.73    0.63
   5  -5   7    0.16    0.02
   6  -5   7    0.17    0.02
  -8  -4   7    0.56    0.04
  -7  -4   7    0.13    0.03
  -6  -4   7    0.20    0.03
  -5  -4   7    6.45    0.20
  -4  -4   7    5.33    0.19
  -3  -4   7    2.80    0.09
  -2  -4   7    5.63    0.29
  -1  -4   7   11.23    0.64
   0  -4   7  119.63    6.57
   1  -4   7    2.92    0.12
   2  -4   7    9.34    0.34
   3  -4   7    0.79    0.04
   4  -4   7   13.59    0.29
   5  -4   7    0.48    0.02
   6  -4   7    0.04    0.02
   7  -4   7    9.86    0.40
  -8  -3   7    0.10    0.02
  -7  -3   7    1.45    0.09
  -6  -3   7    0.03    0.02
  -5  -3   7   22.57    0.94
  -4  -3   7    0.78    0.05
  -3  -3   7    6.27    0.22
  -1  -3   7  183.40   10.20
   0  -3   7   70.83    3.98
   1  -3   7   88.81    4.87
   2  -3   7    1.31    0.07
   3  -3   7    2.63    0.08
   4  -3   7   22.23    0.42
   5  -3   7    0.08    0.02
   6  -3   7    2.75    0.08
   7  -3   7    0.02    0.02
  -8  -2   7    2.94    0.14
  -7  -2   7    2.53    0.13
  -6  -2   7   58.04    1.30
  -5  -2   7   15.10    0.50
  -4  -2   7   15.25    0.50
  -3  -2   7  194.19    9.86
  -1  -2   7    1.69    0.12
   0  -2   7  198.76   10.81
   1  -2   7    6.58    0.41
   2  -2   7    0.09    0.04
   3  -2   7   10.67    0.29
   4  -2   7    0.78    0.03
   5  -2   7    3.65    0.09
   6  -2   7    8.90    0.18
   7  -2   7    1.20    0.07
  -8  -1   7    1.69    0.06
  -7  -1   7    1.02    0.05
  -6  -1   7    5.71    0.18
  -5  -1   7    0.07    0.02
  -4  -1   7   44.49    1.41
  -3  -1   7    0.60    0.06
  -2  -1   7   53.95    2.69
  -1  -1   7    3.17    0.20
   0  -1   7  105.20    5.57
   1  -1   7    6.83    0.41
   2  -1   7    7.17    0.45
   3  -1   7   29.10    0.75
   4  -1   7    2.85    0.07
   5  -1   7   10.31    0.19
   6  -1   7   11.59    0.24
   7  -1   7    0.29    0.02
  -8   0   7   -0.01    0.02
  -7   0   7    0.00    0.02
  -6   0   7    0.11    0.03
  -5   0   7    0.01    0.02
  -4   0   7    0.00    0.02
  -3   0   7    0.01    0.02
  -2   0   7    0.00    0.02
  -1   0   7    0.01    0.01
   0   0   7    0.02    0.02
   1   0   7    0.00    0.02
   2   0   7    0.01    0.03
   3   0   7    0.00    0.03
   4   0   7    0.02    0.01
   5   0   7    0.01    0.01
   6   0   7    0.00    0.02
   7   0   7    0.00    0.01
  -8   1   7    1.74    0.06
  -7   1   7    1.09    0.05
  -6   1   7    5.66    0.25
  -5   1   7    0.04    0.03
  -4   1   7   43.36    1.41
  -3   1   7    0.45    0.05
  -2   1   7   51.46    2.69
  -1   1   7    3.06    0.18
   0   1   7   94.41    3.76
   1   1   7    6.68    0.40
   2   1   7    7.48    0.45
   3   1   7   30.15    1.69
   4   1   7    2.75    0.09
   5   1   7   10.31    0.21
   6   1   7   11.52    0.27
   7   1   7    0.32    0.03
  -8   2   7    2.95    0.10
  -7   2   7    2.46    0.09
  -6   2   7   57.33    1.57
  -5   2   7   14.81    0.63
  -4   2   7   14.96    0.63
  -3   2   7  187.94    9.86
  -2   2   7    2.19    0.14
  -1   2   7    1.61    0.11
   0   2   7  186.44   10.81
   1   2   7    6.96    0.41
   2   2   7    0.15    0.04
   4   2   7    0.69    0.04
   5   2   7    3.60    0.10
   6   2   7    8.27    0.20
   7   2   7    1.19    0.06
  -8   3   7    0.15    0.03
  -7   3   7    1.61    0.07
  -6   3   7    0.06    0.02
   3   3   7    2.47    0.08
   4   3   7   21.60    0.61
   5   3   7    0.08    0.01
   6   3   7    2.71    0.09
   7   3   7    0.02    0.01
  -8   4   7    0.64    0.05
  -7   4   7    0.15    0.02
  -6   4   7    0.35    0.04
  -5   4   7    6.33    0.30
   3   4   7    0.71    0.04
   4   4   7   13.64    0.31
   5   4   7    0.44    0.02
   6   4   7    0.02    0.01
  -7   5   7    5.94    0.26
  -6   5   7    1.60    0.05
  -5   5   7    0.06    0.02
  -4   5   7    0.90    0.07
   2   5   7   33.76    0.93
   3   5   7   45.21    1.23
   4   5   7   21.27    0.38
   5   5   7    0.15    0.01
   6   5   7    0.17    0.02
  -7   6   7    2.31    0.11
  -6   6   7   25.65    0.71
  -5   6   7    1.34    0.04
  -4   6   7    5.05    0.13
  -3   6   7    0.35    0.05
  -2   6   7    0.33    0.03
  -1   6   7   13.74    0.58
   0   6   7    7.95    0.35
   1   6   7    0.06    0.02
   2   6   7    2.23    0.11
   3   6   7    9.79    0.21
   4   6   7   11.38    0.20
   5   6   7    0.18    0.02
   6   6   7    4.93    0.19
  -7   7   7   21.30    0.80
  -6   7   7    4.10    0.18
  -5   7   7   68.85    1.34
  -4   7   7   11.34    0.24
  -3   7   7   44.56    0.99
  -2   7   7    0.28    0.03
  -1   7   7    0.05    0.02
   0   7   7    0.05    0.02
   1   7   7    8.32    0.23
   2   7   7   11.58    0.28
   3   7   7    2.69    0.06
   4   7   7    8.20    0.19
   5   7   7   10.19    0.29
   6   7   7    7.10    0.27
  -6   8   7    7.27    0.29
  -5   8   7    0.56    0.03
  -4   8   7    0.58    0.03
  -3   8   7   29.79    0.53
  -2   8   7    1.19    0.04
  -1   8   7    0.63    0.03
   0   8   7   23.90    0.53
   1   8   7    0.02    0.01
   2   8   7   14.18    0.24
   3   8   7    2.30    0.05
   4   8   7    1.93    0.07
   5   8   7   12.48    0.34
  -6   9   7    1.13    0.06
  -5   9   7    8.72    0.20
  -4   9   7    1.04    0.04
  -3   9   7    1.39    0.04
  -2   9   7    1.96    0.05
  -1   9   7    1.05    0.03
   0   9   7    0.50    0.03
   1   9   7    1.90    0.05
   2   9   7    0.32    0.02
   3   9   7    1.47    0.04
   4   9   7    1.10    0.05
   5   9   7    4.67    0.14
  -5  10   7    0.35    0.03
  -4  10   7    4.57    0.14
  -3  10   7    0.16    0.02
  -2  10   7    7.07    0.15
  -1  10   7    3.11    0.07
   0  10   7    2.08    0.05
   1  10   7    4.85    0.10
   2  10   7    0.78    0.03
   3  10   7    0.21    0.02
   4  10   7    0.48    0.03
  -4  11   7    5.52    0.16
  -3  11   7    1.27    0.04
  -2  11   7    0.23    0.02
  -1  11   7    0.10    0.01
   0  11   7    0.28    0.02
   1  11   7    0.08    0.02
   2  11   7   10.95    0.27
   3  11   7   15.03    0.42
  -2  12   7   16.62    0.63
  -1 -12   8    2.96    0.15
   0 -12   8    3.31    0.10
   1 -12   8    4.36    0.18
   2 -12   8    0.10    0.02
  -4 -11   8    1.08    0.06
  -3 -11   8    0.03    0.02
  -2 -11   8    0.04    0.02
  -1 -11   8    7.41    0.22
   0 -11   8    3.74    0.12
   1 -11   8    2.44    0.11
   2 -11   8    3.14    0.14
   3 -11   8    0.56    0.03
  -5 -10   8    1.37    0.07
  -4 -10   8    4.83    0.22
  -3 -10   8   10.89    0.49
  -2 -10   8    2.71    0.09
  -1 -10   8    0.87    0.04
   0 -10   8    4.48    0.15
   1 -10   8    1.13    0.07
   2 -10   8    6.54    0.19
   3 -10   8    1.35    0.05
   4 -10   8    0.15    0.02
  -5  -9   8    6.96    0.31
  -4  -9   8    2.71    0.14
  -3  -9   8    3.90    0.19
  -2  -9   8    1.13    0.05
  -1  -9   8    0.25    0.03
   0  -9   8    6.09    0.19
   1  -9   8   -0.01    0.02
   2  -9   8    0.90    0.05
   3  -9   8    1.24    0.05
   4  -9   8    1.63    0.06
   5  -9   8    0.11    0.02
  -5  -8   8    0.12    0.03
  -4  -8   8    0.10    0.03
  -3  -8   8    1.67    0.10
  -2  -8   8   22.35    0.62
  -1  -8   8   17.09    0.73
   0  -8   8   29.88    1.31
   1  -8   8    6.04    0.15
   2  -8   8    0.21    0.02
   3  -8   8    7.10    0.18
   4  -8   8    2.96    0.10
   5  -8   8    6.08    0.25
  -5  -7   8    3.60    0.17
  -4  -7   8   40.46    1.69
  -3  -7   8   18.21    0.76
  -2  -7   8   29.14    1.20
  -1  -7   8   25.11    0.81
   0  -7   8    7.70    0.28
   1  -7   8    5.22    0.24
   2  -7   8    0.86    0.05
   3  -7   8    4.24    0.12
   4  -7   8    1.43    0.07
   5  -7   8    1.27    0.08
   6  -7   8    4.83    0.20
  -5  -6   8   31.75    1.31
  -4  -6   8    3.41    0.16
  -3  -6   8   74.29    2.41
  -2  -6   8   24.19    0.99
  -1  -6   8    0.50    0.04
   0  -6   8    5.42    0.20
   1  -6   8    1.82    0.09
   2  -6   8    4.00    0.12
   3  -6   8   16.07    0.38
   4  -6   8    1.88    0.06
   5  -6   8    0.53    0.03
   6  -6   8    7.36    0.21
  -6  -5   8    1.43    0.10
  -5  -5   8    3.77    0.13
  -4  -5   8    0.04    0.02
  -3  -5   8    0.94    0.05
  -2  -5   8    8.14    0.36
  -1  -5   8    0.04    0.02
   0  -5   8    0.02    0.02
   1  -5   8    4.45    0.17
   2  -5   8    3.29    0.10
   3  -5   8    2.01    0.07
   4  -5   8    0.00    0.02
   5  -5   8    0.32    0.03
   6  -5   8    1.66    0.06
  -8  -4   8    0.00    0.02
  -7  -4   8    4.44    0.22
  -6  -4   8    0.36    0.06
  -5  -4   8    0.24    0.03
  -4  -4   8    2.10    0.09
  -3  -4   8    0.78    0.05
  -2  -4   8    0.31    0.04
  -1  -4   8   43.14    1.44
   0  -4   8    1.44    0.07
   1  -4   8    2.08    0.09
   2  -4   8    1.47    0.06
   3  -4   8    9.77    0.22
   4  -4   8    2.45    0.08
   5  -4   8    2.92    0.06
   6  -4   8    8.44    0.25
  -8  -3   8   19.75    0.85
  -7  -3   8    0.00    0.02
  -6  -3   8    0.09    0.02
  -5  -3   8    0.36    0.04
  -4  -3   8    0.29    0.03
  -3  -3   8   12.93    0.43
  -2  -3   8   24.54    1.04
  -1  -3   8  107.03    6.18
   0  -3   8   45.86    2.59
   1  -3   8    3.90    0.15
   2  -3   8   24.85    0.83
   3  -3   8   51.73    1.08
   4  -3   8    0.50    0.03
   5  -3   8    3.16    0.08
   6  -3   8    3.42    0.09
   7  -3   8    9.52    0.37
  -8  -2   8    1.19    0.07
  -7  -2   8    9.02    0.27
  -6  -2   8   14.10    0.33
  -5  -2   8   28.69    1.13
  -4  -2   8    3.56    0.13
  -3  -2   8    3.50    0.13
  -2  -2   8    0.35    0.05
  -1  -2   8   40.37    2.30
   0  -2   8    1.88    0.13
   1  -2   8   51.09    2.83
   2  -2   8   34.64    1.18
   3  -2   8    2.82    0.07
   4  -2   8   24.54    0.41
   5  -2   8   24.87    0.49
   6  -2   8    8.49    0.18
  -8  -1   8    0.34    0.03
  -7  -1   8    6.01    0.18
  -6  -1   8    1.08    0.05
  -5  -1   8    1.69    0.10
  -4  -1   8    0.11    0.02
  -3  -1   8   20.62    0.68
  -2  -1   8   12.59    0.66
  -1  -1   8    2.55    0.17
   0  -1   8   11.63    0.66
   1  -1   8   20.32    1.14
   2  -1   8    5.38    0.35
   3  -1   8   11.99    0.26
   4  -1   8    4.48    0.09
   5  -1   8    3.25    0.07
   6  -1   8    2.86    0.08
   7  -1   8    2.39    0.08
  -8   0   8    0.58    0.04
  -7   0   8   17.68    0.48
  -6   0   8    0.23    0.02
  -5   0   8    9.35    0.31
  -4   0   8    0.78    0.05
  -3   0   8   97.16    5.05
  -2   0   8  110.48    5.73
  -1   0   8   48.91    2.58
   0   0   8  141.76    5.42
   1   0   8  101.02    5.72
   2   0   8   64.27    3.66
   3   0   8   30.17    0.74
   4   0   8   12.68    0.27
   5   0   8   24.11    0.42
   6   0   8   18.99    0.43
   7   0   8    0.37    0.03
  -8   1   8    0.38    0.03
  -7   1   8    6.42    0.19
  -6   1   8    1.13    0.05
  -5   1   8    1.55    0.10
  -4   1   8    0.10    0.02
  -3   1   8   21.46    1.12
  -2   1   8   12.11    0.66
  -1   1   8    2.25    0.15
   0   1   8   10.75    0.65
   1   1   8   19.90    1.14
   2   1   8    5.37    0.34
   3   1   8   12.08    0.31
   4   1   8    4.18    0.11
   5   1   8    3.37    0.07
   6   1   8    2.94    0.08
   7   1   8    2.18    0.07
  -8   2   8    1.33    0.05
  -7   2   8    9.31    0.27
  -6   2   8   13.78    0.40
  -5   2   8   26.03    1.12
  -4   2   8    3.20    0.16
  -3   2   8    3.30    0.21
  -2   2   8    0.29    0.05
  -1   2   8   37.75    2.10
   0   2   8    1.71    0.12
   1   2   8   50.38    2.82
   3   2   8    2.83    0.09
   4   2   8   23.89    0.54
   5   2   8   23.93    0.47
   6   2   8    8.45    0.24
   7   2   8    8.89    0.34
  -8   3   8   21.16    0.85
  -7   3   8    0.02    0.02
  -6   3   8    0.12    0.02
  -5   3   8    0.37    0.06
   3   3   8   51.34    1.39
   4   3   8    0.51    0.03
   5   3   8    3.27    0.08
   6   3   8    3.38    0.08
   7   3   8    9.32    0.36
  -8   4   8    0.03    0.02
  -7   4   8    5.11    0.15
  -6   4   8    0.39    0.03
  -5   4   8    0.25    0.06
   2   4   8    1.52    0.06
   3   4   8    9.67    0.28
   4   4   8    2.33    0.05
   5   4   8    2.91    0.07
   6   4   8    8.48    0.19
  -7   5   8    6.06    0.27
  -6   5   8    1.43    0.05
  -5   5   8    3.81    0.11
  -4   5   8    0.05    0.04
  -3   5   8    0.69    0.06
   1   5   8    4.29    0.13
   2   5   8    3.27    0.10
   3   5   8    2.08    0.06
   4   5   8    0.04    0.01
   5   5   8    0.26    0.02
   6   5   8    1.63    0.06
  -7   6   8   25.64    1.04
  -6   6   8    9.45    0.20
  -5   6   8   31.02    0.73
  -4   6   8    3.22    0.08
  -3   6   8   74.97    2.77
  -2   6   8   23.16    0.65
  -1   6   8    0.47    0.03
   0   6   8    5.26    0.16
   1   6   8    1.87    0.07
   2   6   8    4.18    0.17
   3   6   8   16.18    0.27
   4   6   8    1.94    0.05
   5   6   8    0.47    0.03
   6   6   8    7.80    0.29
  -6   7   8   24.64    0.57
  -5   7   8    3.38    0.08
  -4   7   8   40.30    0.79
  -3   7   8   17.47    0.41
  -2   7   8   28.52    0.56
  -1   7   8   23.90    0.66
   0   7   8    7.51    0.22
   1   7   8    5.15    0.11
   2   7   8    0.90    0.03
   3   7   8    4.47    0.08
   4   7   8    1.39    0.04
   5   7   8    1.34    0.05
   6   7   8    5.41    0.20
  -6   8   8    0.99    0.05
  -5   8   8    0.13    0.02
  -4   8   8    0.14    0.02
  -3   8   8    1.65    0.04
  -2   8   8   21.50    0.39
  -1   8   8   17.21    0.31
   0   8   8   31.45    0.61
   1   8   8    6.20    0.14
   2   8   8    0.20    0.01
   3   8   8    7.28    0.13
   4   8   8    3.06    0.10
   5   8   8    6.48    0.25
  -6   9   8    0.42    0.03
  -5   9   8    7.12    0.17
  -4   9   8    2.80    0.07
  -3   9   8    4.01    0.08
  -2   9   8    1.08    0.03
  -1   9   8    0.31    0.02
   0   9   8    6.28    0.13
   1   9   8    0.01    0.01
   2   9   8    0.88    0.03
   3   9   8    1.31    0.04
   4   9   8    1.84    0.06
   5   9   8    0.11    0.01
  -5  10   8    1.51    0.09
  -4  10   8    5.09    0.12
  -3  10   8   11.44    0.24
  -2  10   8    2.75    0.06
  -1  10   8    0.85    0.03
   0  10   8    4.72    0.10
   1  10   8    1.10    0.03
   2  10   8    6.50    0.14
   3  10   8    1.37    0.05
   4  10   8    0.11    0.01
  -4  11   8    1.25    0.05
  -3  11   8    0.06    0.01
  -2  11   8    0.03    0.01
  -1  11   8    7.58    0.14
   0  11   8    3.97    0.08
   1  11   8    2.30    0.06
   3  11   8    0.55    0.03
  -2  12   8    3.38    0.14
  -1  12   8    3.33    0.13
  -1 -12   9    0.34    0.03
   0 -12   9    0.18    0.02
   1 -12   9    0.00    0.01
  -3 -11   9    0.79    0.05
  -2 -11   9    0.29    0.04
  -1 -11   9    0.63    0.03
   0 -11   9    2.81    0.13
   1 -11   9    2.93    0.13
   3 -11   9    2.38    0.10
  -4 -10   9    0.35    0.04
  -3 -10   9    2.88    0.14
  -2 -10   9    4.09    0.13
  -1 -10   9    3.36    0.11
   0 -10   9    1.59    0.09
   1 -10   9    0.42    0.03
   2 -10   9    2.91    0.09
   3 -10   9    0.53    0.03
   4 -10   9    0.02    0.01
  -5  -9   9    0.27    0.03
  -4  -9   9    6.15    0.28
  -3  -9   9    0.21    0.03
  -2  -9   9    1.32    0.06
  -1  -9   9    5.66    0.18
   0  -9   9    1.04    0.05
   1  -9   9    4.50    0.14
   2  -9   9    7.61    0.22
   3  -9   9   -0.01    0.01
   4  -9   9    1.20    0.07
  -5  -8   9    1.48    0.08
  -4  -8   9    3.56    0.17
  -3  -8   9   10.07    0.30
  -2  -8   9    3.69    0.12
  -1  -8   9    5.35    0.17
   0  -8   9    6.18    0.18
   1  -8   9    4.92    0.11
   2  -8   9    1.77    0.05
   3  -8   9    4.69    0.12
   4  -8   9    0.07    0.03
   5  -8   9    0.30    0.03
  -5  -7   9   12.24    0.53
  -4  -7   9   28.61    1.17
  -3  -7   9   28.09    0.80
  -2  -7   9    0.01    0.02
  -1  -7   9    0.05    0.02
   0  -7   9   15.77    0.46
   1  -7   9    0.23    0.02
   2  -7   9    4.50    0.09
   3  -7   9    4.87    0.13
   4  -7   9    1.79    0.06
   5  -7   9    0.09    0.02
  -6  -6   9    9.99    0.42
  -5  -6   9    3.71    0.18
  -4  -6   9   18.59    0.56
  -3  -6   9   40.15    1.14
  -2  -6   9   22.26    0.66
  -1  -6   9   54.43    1.41
   0  -6   9   15.78    0.42
   1  -6   9    9.17    0.25
   2  -6   9   10.47    0.26
   3  -6   9    0.02    0.01
   4  -6   9    0.46    0.04
   5  -6   9    0.55    0.03
   6  -6   9    0.04    0.02
  -6  -5   9    5.72    0.18
  -5  -5   9   20.26    0.61
  -4  -5   9    6.79    0.21
  -3  -5   9   17.89    0.60
  -2  -5   9    0.01    0.02
  -1  -5   9   71.79    2.35
   0  -5   9   85.43    2.81
   1  -5   9    7.58    0.28
   2  -5   9    1.62    0.05
   3  -5   9   21.43    0.43
   4  -5   9    1.17    0.05
   5  -5   9    2.51    0.07
   6  -5   9    3.57    0.15
  -6  -4   9    0.61    0.04
  -5  -4   9   40.64    0.95
  -4  -4   9   16.23    0.67
  -3  -4   9   27.96    0.91
  -2  -4   9    4.64    0.22
  -1  -4   9    0.58    0.05
   0  -4   9   25.32    0.86
   1  -4   9    0.05    0.02
   2  -4   9    0.40    0.03
   3  -4   9   16.11    0.38
   4  -4   9    3.12    0.07
   5  -4   9    5.34    0.14
   6  -4   9    0.44    0.05
  -8  -3   9    2.26    0.11
  -7  -3   9    5.71    0.17
  -6  -3   9    0.21    0.02
  -5  -3   9   26.03    0.75
  -4  -3   9    1.72    0.08
  -3  -3   9    7.71    0.26
  -2  -3   9    0.52    0.05
  -1  -3   9    0.17    0.03
   0  -3   9   17.41    0.60
   1  -3   9    1.10    0.06
   2  -3   9    0.55    0.03
   3  -3   9    8.92    0.18
   4  -3   9    7.50    0.15
   5  -3   9    6.96    0.15
   6  -3   9    1.03    0.07
  -8  -2   9    4.00    0.19
  -7  -2   9   19.27    0.55
  -6  -2   9    4.42    0.10
  -5  -2   9    1.11    0.05
  -4  -2   9    3.28    0.13
  -3  -2   9   10.65    0.35
  -2  -2   9   64.29    2.00
  -1  -2   9    8.94    0.55
   0  -2   9   49.75    2.77
   1  -2   9   55.75    1.84
   2  -2   9   48.08    1.23
   3  -2   9   53.91    1.02
   4  -2   9    3.08    0.06
   5  -2   9    0.46    0.03
   6  -2   9    1.60    0.05
  -8  -1   9    5.91    0.18
  -7  -1   9   31.75    0.88
  -6  -1   9   65.12    1.15
  -5  -1   9    0.51    0.04
  -4  -1   9   10.55    0.35
  -3  -1   9    1.27    0.06
  -2  -1   9    7.08    0.38
  -1  -1   9   13.99    0.72
   0  -1   9    1.51    0.12
   1  -1   9    3.54    0.24
   2  -1   9   15.24    0.54
   3  -1   9   16.85    0.37
   4  -1   9    0.34    0.02
   5  -1   9   68.95    1.16
   6  -1   9    1.49    0.05
  -8   0   9    0.00    0.02
  -7   0   9    0.06    0.02
  -6   0   9    0.00    0.01
  -5   0   9    0.05    0.02
  -4   0   9    0.04    0.02
  -3   0   9    0.35    0.04
  -2   0   9    0.03    0.03
  -1   0   9    0.06    0.02
   0   0   9    0.04    0.03
   1   0   9    0.10    0.04
   2   0   9    0.00    0.03
   3   0   9    0.03    0.01
   4   0   9    0.01    0.01
   5   0   9   -0.03    0.01
   6   0   9    0.01    0.01
   7   0   9    0.01    0.01
  -8   1   9    6.29    0.18
  -7   1   9   33.35    0.89
  -6   1   9   65.75    1.28
  -5   1   9    0.56    0.04
  -4   1   9   10.30    0.35
  -3   1   9    1.16    0.06
  -2   1   9    6.55    0.38
  -1   1   9   12.51    0.71
   0   1   9    1.47    0.11
   1   1   9    3.50    0.23
   2   1   9   16.19    0.53
   3   1   9   17.58    0.43
   4   1   9    0.32    0.02
   5   1   9   67.60    1.16
   6   1   9    1.49    0.04
   7   1   9    0.65    0.04
  -8   2   9    4.40    0.13
  -7   2   9   20.74    0.56
  -6   2   9    4.50    0.10
  -5   2   9    1.05    0.06
  -4   2   9    3.11    0.16
  -3   2   9   10.15    0.58
  -2   2   9   58.02    3.25
   1   2   9   57.79    3.17
   2   2   9   48.23    1.92
   3   2   9   57.36    1.49
   4   2   9    3.00    0.07
   5   2   9    0.49    0.02
   6   2   9    1.72    0.05
   7   2   9    0.92    0.05
  -8   3   9    2.58    0.12
  -7   3   9    5.90    0.18
  -6   3   9    0.18    0.02
  -5   3   9   23.81    1.08
   2   3   9    0.48    0.03
   3   3   9    9.19    0.26
   4   3   9    7.40    0.15
   5   3   9    6.90    0.14
   6   3   9    0.93    0.03
  -8   4   9    0.12    0.02
  -7   4   9    6.64    0.19
  -6   4   9    0.59    0.04
  -5   4   9   41.56    0.94
   1   4   9    0.04    0.01
   2   4   9    0.51    0.03
   3   4   9   16.00    0.36
   4   4   9    3.14    0.07
   5   4   9    5.36    0.11
   6   4   9    0.39    0.02
  -7   5   9    3.41    0.16
  -6   5   9    5.63    0.15
  -5   5   9   20.58    0.61
  -4   5   9    6.59    0.21
  -1   5   9   66.64    1.92
   0   5   9   82.68    2.29
   1   5   9    7.74    0.22
   2   5   9    1.70    0.06
   3   5   9   21.73    0.38
   4   5   9    1.17    0.03
   5   5   9    2.45    0.05
   6   5   9    3.48    0.10
  -7   6   9    1.62    0.08
  -6   6   9    9.57    0.30
  -5   6   9    3.70    0.10
  -4   6   9   19.00    0.45
  -3   6   9   38.41    0.88
  -2   6   9   23.20    0.86
  -1   6   9   54.08    1.50
   0   6   9   15.92    0.44
   1   6   9    9.58    0.27
   2   6   9   11.17    0.20
   3   6   9    0.02    0.01
   4   6   9    0.41    0.02
   5   6   9    0.53    0.02
   6   6   9    0.00    0.01
  -6   7   9    8.82    0.21
  -5   7   9   12.29    0.30
  -4   7   9   27.43    0.55
  -3   7   9   27.94    0.55
  -2   7   9    0.05    0.02
  -1   7   9    0.05    0.01
   0   7   9   15.62    0.36
   1   7   9    0.21    0.02
   2   7   9    4.67    0.09
   3   7   9    4.95    0.10
   4   7   9    1.68    0.04
   5   7   9    0.09    0.01
  -6   8   9    5.94    0.15
  -5   8   9    1.51    0.04
  -4   8   9    3.38    0.08
  -3   8   9   10.32    0.21
  -2   8   9    3.70    0.08
  -1   8   9    5.46    0.11
   0   8   9    6.22    0.13
   1   8   9    5.05    0.11
   2   8   9    1.77    0.04
   3   8   9    4.97    0.09
   4   8   9    0.05    0.01
   5   8   9    0.34    0.02
  -5   9   9    0.24    0.03
  -4   9   9    6.21    0.13
  -3   9   9    0.22    0.02
  -2   9   9    1.28    0.04
  -1   9   9    5.64    0.11
   0   9   9    1.04    0.04
   1   9   9    4.54    0.10
   2   9   9    7.61    0.14
   3   9   9    0.02    0.01
   4   9   9    1.32    0.05
  -5  10   9    0.03    0.02
  -4  10   9    0.29    0.02
  -3  10   9    2.93    0.07
  -2  10   9    4.05    0.08
  -1  10   9    3.49    0.07
   0  10   9    1.58    0.04
   1  10   9    0.38    0.02
   2  10   9    2.92    0.07
   3  10   9    0.55    0.03
   4  10   9    0.04    0.01
  -3  11   9    0.88    0.04
  -2  11   9    0.38    0.02
  -1  11   9    0.69    0.03
   0  11   9    2.84    0.07
   1  11   9    2.91    0.09
  -3 -11  10    0.30    0.03
  -2 -11  10    0.32    0.02
  -1 -11  10    0.04    0.01
   0 -11  10    0.82    0.05
   1 -11  10    0.47    0.04
   2 -11  10    1.84    0.09
  -4 -10  10    6.94    0.32
  -3 -10  10    1.26    0.07
  -2 -10  10   23.86    0.68
  -1 -10  10    1.75    0.07
   0 -10  10    0.43    0.04
   1 -10  10    0.85    0.04
   2 -10  10    9.95    0.28
   3 -10  10    0.83    0.03
  -5  -9  10   12.90    0.53
  -4  -9  10    5.30    0.24
  -3  -9  10    2.35    0.08
  -2  -9  10    1.39    0.06
  -1  -9  10    0.01    0.02
   0  -9  10    0.62    0.04
   1  -9  10    2.09    0.08
   2  -9  10    0.67    0.04
   3  -9  10    0.77    0.04
   4  -9  10    2.30    0.10
  -5  -8  10   16.88    0.70
  -4  -8  10    4.93    0.23
  -3  -8  10    9.84    0.30
  -2  -8  10   24.86    0.72
  -1  -8  10    5.46    0.14
   0  -8  10   15.14    0.36
   1  -8  10    1.15    0.04
   2  -8  10    9.13    0.19
   3  -8  10    2.70    0.06
   4  -8  10    6.82    0.28
   5  -8  10    4.19    0.17
  -6  -7  10    1.08    0.06
  -5  -7  10    2.21    0.11
  -4  -7  10    2.93    0.10
  -3  -7  10    2.66    0.08
  -2  -7  10   34.04    0.61
  -1  -7  10   39.17    0.78
   0  -7  10   53.35    0.94
   1  -7  10   27.03    0.48
   2  -7  10   21.74    0.39
   3  -7  10    1.42    0.04
   4  -7  10    6.25    0.15
   5  -7  10    1.87    0.09
  -6  -6  10    0.01    0.02
  -5  -6  10    2.14    0.08
  -4  -6  10    0.19    0.02
  -3  -6  10    2.26    0.09
  -2  -6  10   22.46    0.56
  -1  -6  10   37.86    0.93
   0  -6  10  148.38    4.22
   1  -6  10   13.57    0.32
   2  -6  10    4.65    0.10
   3  -6  10    0.69    0.03
   4  -6  10    9.44    0.27
   5  -6  10    0.25    0.03
  -6  -5  10    0.05    0.02
  -5  -5  10    0.97    0.04
  -4  -5  10    1.86    0.05
  -3  -5  10    0.02    0.02
  -2  -5  10   13.88    0.41
  -1  -5  10    0.34    0.03
   0  -5  10   54.02    1.39
   1  -5  10    1.32    0.06
   2  -5  10   11.76    0.26
   3  -5  10    1.55    0.04
   4  -5  10    0.50    0.03
   5  -5  10    0.22    0.02
  -6  -4  10    0.03    0.02
  -5  -4  10   29.11    0.58
  -4  -4  10   16.70    0.49
  -3  -4  10   18.54    0.47
  -2  -4  10   10.75    0.47
  -1  -4  10   39.61    1.29
   0  -4  10   73.88    2.40
   1  -4  10    6.27    0.23
   2  -4  10    0.17    0.02
   3  -4  10   11.80    0.25
   4  -4  10    1.56    0.04
   5  -4  10    5.71    0.18
   6  -4  10    0.93    0.06
  -6  -3  10    5.39    0.14
  -5  -3  10   28.32    0.57
  -4  -3  10   15.98    0.47
  -3  -3  10    3.68    0.14
  -2  -3  10    1.46    0.07
  -1  -3  10    1.00    0.06
   0  -3  10    2.24    0.10
   1  -3  10    0.06    0.02
   2  -3  10    4.82    0.12
   3  -3  10    2.29    0.06
   4  -3  10    4.43    0.10
   5  -3  10    0.16    0.02
   6  -3  10    0.29    0.04
  -8  -2  10    0.04    0.01
  -7  -2  10    4.76    0.15
  -6  -2  10    2.00    0.06
  -5  -2  10    9.41    0.28
  -4  -2  10    0.05    0.02
  -3  -2  10   38.85    1.21
  -2  -2  10    0.12    0.02
  -1  -2  10   13.90    0.57
   0  -2  10   16.96    0.57
   1  -2  10    0.95    0.06
   2  -2  10    0.56    0.03
   3  -2  10    0.10    0.02
   4  -2  10   13.62    0.23
   5  -2  10    0.01    0.01
   6  -2  10   14.26    0.39
  -8  -1  10    0.73    0.05
  -7  -1  10    2.76    0.09
  -6  -1  10    3.56    0.08
  -5  -1  10   41.42    1.17
  -4  -1  10    1.20    0.06
  -3  -1  10    5.62    0.19
  -2  -1  10    5.21    0.17
  -1  -1  10    1.19    0.06
   0  -1  10   14.60    0.49
   1  -1  10    0.77    0.05
   2  -1  10   13.39    0.30
   3  -1  10    2.34    0.06
   4  -1  10    8.05    0.15
   5  -1  10    3.22    0.07
   6  -1  10    0.06    0.01
  -8   0  10    2.44    0.08
  -7   0  10    8.75    0.25
  -6   0  10   29.87    0.53
  -5   0  10    1.99    0.08
  -4   0  10    3.18    0.13
  -3   0  10   33.67    1.09
  -2   0  10   27.07    0.88
  -1   0  10    6.06    0.34
   0   0  10   13.21    0.79
   1   0  10    3.64    0.25
   2   0  10   15.59    0.39
   3   0  10    0.31    0.02
   4   0  10   12.29    0.22
   5   0  10    2.43    0.05
   6   0  10   23.82    0.53
  -8   1  10    0.79    0.04
  -7   1  10    2.91    0.10
  -6   1  10    3.52    0.09
  -5   1  10   38.83    1.17
  -4   1  10    0.96    0.06
  -3   1  10    5.19    0.19
  -2   1  10    4.29    0.28
  -1   1  10    1.06    0.09
   0   1  10   13.79    0.84
   2   1  10   14.15    0.35
   3   1  10    2.43    0.08
   4   1  10    8.02    0.16
   5   1  10    3.20    0.07
   6   1  10    0.03    0.01
  -8   2  10    0.04    0.01
  -7   2  10    5.14    0.15
  -6   2  10    2.09    0.06
  -5   2  10    8.72    0.23
  -3   2  10   34.09    1.96
  -2   2  10    0.17    0.04
   1   2  10    0.93    0.06
   2   2  10    0.57    0.03
   3   2  10    0.16    0.02
   4   2  10   13.67    0.27
   5   2  10    0.02    0.01
   6   2  10   14.49    0.31
  -8   3  10    5.02    0.22
  -7   3  10   20.15    0.55
  -6   3  10    5.38    0.14
  -5   3  10   28.47    0.57
  -4   3  10   14.75    0.68
   1   3  10    0.04    0.02
   2   3  10    4.85    0.15
   3   3  10    2.29    0.06
   4   3  10    4.35    0.10
   5   3  10    0.20    0.02
   6   3  10    0.33    0.02
  -7   4  10    1.07    0.05
  -6   4  10    0.02    0.02
  -5   4  10   29.25    0.68
  -4   4  10   16.22    0.71
  -1   4  10   34.85    1.43
   0   4  10   69.71    1.96
   1   4  10    6.42    0.19
   2   4  10    0.16    0.02
   3   4  10   12.01    0.24
   4   4  10    1.56    0.04
   5   4  10    5.65    0.12
   6   4  10    0.96    0.04
  -7   5  10    1.04    0.06
  -6   5  10    0.07    0.02
  -5   5  10    1.06    0.06
  -4   5  10    1.88    0.08
  -3   5  10    0.05    0.02
  -2   5  10   12.96    0.53
  -1   5  10    0.31    0.03
   0   5  10   54.42    1.49
   1   5  10    1.42    0.06
   2   5  10   12.69    0.28
   3   5  10    1.42    0.04
   4   5  10    0.47    0.02
   5   5  10    0.22    0.02
   6   5  10    1.73    0.05
  -7   6  10    3.96    0.17
  -6   6  10    0.05    0.02
  -5   6  10    2.21    0.09
  -4   6  10    0.17    0.02
  -3   6  10    2.09    0.06
  -2   6  10   21.87    0.51
  -1   6  10   35.69    0.82
   0   6  10  148.93    3.27
   1   6  10   13.90    0.31
   2   6  10    4.53    0.09
   3   6  10    0.64    0.03
   4   6  10    9.57    0.17
   5   6  10    0.25    0.02
  -6   7  10    1.08    0.05
  -5   7  10    2.17    0.07
  -4   7  10    3.02    0.07
  -3   7  10    2.60    0.07
  -2   7  10   34.27    0.60
  -1   7  10   38.64    0.75
   0   7  10   55.27    1.05
   1   7  10   27.89    0.54
   2   7  10   22.46    0.39
   3   7  10    1.42    0.04
   4   7  10    6.25    0.12
   5   7  10    1.98    0.05
  -6   8  10    0.15    0.02
  -5   8  10   16.81    0.39
  -4   8  10    5.09    0.11
  -3   8  10   10.27    0.21
  -2   8  10   25.36    0.44
  -1   8  10    5.65    0.12
   0   8  10   15.76    0.31
   1   8  10    1.32    0.04
   2   8  10    9.50    0.17
   3   8  10    2.76    0.06
   4   8  10    7.35    0.17
   5   8  10    4.52    0.17
  -5   9  10   12.54    0.37
  -4   9  10    5.40    0.12
  -3   9  10    2.40    0.06
  -2   9  10    1.45    0.04
  -1   9  10    0.03    0.01
   0   9  10    0.58    0.03
   1   9  10    2.21    0.05
   2   9  10    0.68    0.03
   3   9  10    0.85    0.03
   4   9  10    2.38    0.07
  -4  10  10    7.38    0.18
  -3  10  10    1.26    0.04
  -2  10  10   24.31    0.56
  -1  10  10    1.90    0.05
   0  10  10    0.48    0.02
   1  10  10    0.93    0.03
   2  10  10   10.36    0.29
   3  10  10    0.87    0.03
  -3  11  10    0.33    0.02
  -2  11  10    0.32    0.02
  -1  11  10    0.04    0.01
   0  11  10    0.85    0.04
   1  11  10    0.54    0.03
   2  11  10    2.08    0.09
  -2 -11  11    0.01    0.01
  -1 -11  11    1.44    0.07
   0 -11  11    0.12    0.02
   1 -11  11    1.92    0.09
  -4 -10  11    0.85    0.05
  -3 -10  11    3.06    0.10
  -2 -10  11    5.59    0.17
  -1 -10  11    0.06    0.01
   0 -10  11    6.21    0.18
   1 -10  11    0.04    0.01
   2 -10  11    0.01    0.01
  -5  -9  11    7.61    0.33
  -4  -9  11    0.43    0.04
  -3  -9  11    0.22    0.02
  -2  -9  11    2.52    0.09
  -1  -9  11    3.69    0.10
   0  -9  11   12.52    0.36
   1  -9  11    1.45    0.06
   2  -9  11    0.46    0.03
   3  -9  11    3.16    0.13
  -5  -8  11    0.42    0.04
  -4  -8  11    0.39    0.03
  -3  -8  11    0.84    0.04
  -2  -8  11   10.26    0.24
  -1  -8  11    1.08    0.04
   0  -8  11    1.30    0.04
   1  -8  11    0.04    0.01
   2  -8  11    1.53    0.04
   3  -8  11    0.54    0.05
   4  -8  11    0.94    0.05
  -5  -7  11    0.18    0.03
  -4  -7  11    2.68    0.09
  -3  -7  11    3.22    0.08
  -2  -7  11    0.92    0.03
  -1  -7  11    7.01    0.15
   0  -7  11   23.57    0.42
   1  -7  11    0.87    0.03
   2  -7  11   45.69    0.80
   3  -7  11    6.55    0.14
   4  -7  11   13.95    0.40
   5  -7  11    0.84    0.05
  -6  -6  11    2.44    0.12
  -5  -6  11    4.06    0.11
  -4  -6  11    0.13    0.02
  -3  -6  11   25.35    0.53
  -2  -6  11   22.31    0.41
  -1  -6  11   29.10    0.66
   0  -6  11   59.91    1.35
   1  -6  11   18.63    0.33
   2  -6  11    8.51    0.18
   3  -6  11   18.15    0.36
   4  -6  11    0.15    0.02
   5  -6  11   11.56    0.33
  -6  -5  11    3.88    0.13
  -5  -5  11   11.07    0.23
  -4  -5  11    3.47    0.08
  -3  -5  11   56.91    1.63
  -2  -5  11    0.82    0.04
  -1  -5  11   32.61    0.93
   0  -5  11   20.17    0.58
   1  -5  11    0.85    0.04
   2  -5  11    1.50    0.04
   3  -5  11   80.56    1.56
   4  -5  11    0.07    0.01
   5  -5  11    5.12    0.22
  -6  -4  11   21.54    0.50
  -5  -4  11    0.40    0.03
  -4  -4  11    6.56    0.14
  -3  -4  11    4.49    0.12
  -2  -4  11    2.46    0.08
  -1  -4  11   17.59    0.51
   0  -4  11    3.21    0.10
   1  -4  11    8.91    0.25
   2  -4  11    0.08    0.02
   3  -4  11    3.51    0.08
   4  -4  11    0.52    0.03
   5  -4  11    0.09    0.03
  -7  -3  11    0.07    0.03
  -6  -3  11   49.42    0.98
  -5  -3  11    2.36    0.06
  -4  -3  11   52.17    1.49
  -3  -3  11    4.87    0.14
  -2  -3  11    9.34    0.32
  -1  -3  11    3.15    0.16
   0  -3  11    9.41    0.32
   1  -3  11    1.25    0.05
   2  -3  11    1.03    0.04
   3  -3  11    8.40    0.18
   4  -3  11    2.90    0.07
   5  -3  11    0.02    0.01
   6  -3  11    0.45    0.04
  -8  -2  11   11.82    0.46
  -7  -2  11    0.10    0.03
  -6  -2  11    2.30    0.06
  -5  -2  11   10.33    0.22
  -4  -2  11    3.99    0.14
  -3  -2  11   49.91    1.21
  -2  -2  11   34.22    1.08
  -1  -2  11   21.15    0.69
   0  -2  11   12.87    0.44
   1  -2  11    0.08    0.02
   2  -2  11    3.13    0.08
   3  -2  11    1.45    0.04
   4  -2  11   20.44    0.34
   5  -2  11    0.58    0.03
   6  -2  11   11.33    0.45
  -8  -1  11    2.72    0.10
  -7  -1  11   16.62    0.38
  -6  -1  11    3.72    0.08
  -5  -1  11   30.63    0.61
  -4  -1  11   14.83    0.43
  -3  -1  11    4.71    0.17
  -2  -1  11   14.25    0.46
  -1  -1  11    3.03    0.12
   0  -1  11   18.74    0.64
   1  -1  11   27.44    0.93
   2  -1  11    0.51    0.03
   3  -1  11   44.02    0.85
   4  -1  11    0.30    0.02
   5  -1  11    1.06    0.03
   6  -1  11    2.19    0.07
  -8   0  11    0.00    0.01
  -7   0  11    0.00    0.02
  -6   0  11    0.00    0.01
  -5   0  11    0.00    0.01
  -4   0  11    0.14    0.04
  -3   0  11    0.01    0.02
  -2   0  11    0.01    0.02
  -1   0  11    0.02    0.02
   0   0  11    0.03    0.03
   1   0  11    0.05    0.02
   2   0  11    0.04    0.01
   3   0  11    0.07    0.01
   4   0  11    0.02    0.01
   5   0  11    0.01    0.01
   6   0  11    0.02    0.01
  -8   1  11    2.84    0.12
  -7   1  11   16.83    0.41
  -6   1  11    3.74    0.09
  -5   1  11   30.85    0.55
  -4   1  11   13.72    0.43
  -3   1  11    4.27    0.27
  -2   1  11   13.02    0.75
   1   1  11   26.76    0.68
   2   1  11    0.56    0.03
   3   1  11   44.35    0.84
   4   1  11    0.34    0.02
   5   1  11    1.07    0.03
   6   1  11    2.15    0.07
  -8   2  11   12.50    0.34
  -7   2  11    0.08    0.02
  -6   2  11    2.51    0.08
  -5   2  11   10.31    0.22
  -4   2  11    3.89    0.20
  -3   2  11   43.22    2.53
  -2   2  11   29.52    1.75
   1   2  11    0.05    0.01
   2   2  11    3.43    0.11
   3   2  11    1.46    0.04
   4   2  11   21.26    0.40
   5   2  11    0.55    0.02
   6   2  11   11.31    0.31
  -8   3  11    3.97    0.17
  -7   3  11    0.05    0.02
  -6   3  11   50.45    1.14
  -5   3  11    2.26    0.06
  -4   3  11   48.97    2.14
   0   3  11    8.56    0.26
   1   3  11    1.31    0.05
   2   3  11    1.08    0.04
   3   3  11    8.56    0.17
   4   3  11    2.93    0.07
   5   3  11    0.04    0.01
   6   3  11    0.53    0.03
  -7   4  11    2.42    0.07
  -6   4  11   21.46    0.50
  -5   4  11    0.38    0.04
  -4   4  11    6.54    0.17
  -3   4  11    4.56    0.23
  -1   4  11   15.75    0.66
   0   4  11    3.18    0.10
   1   4  11    9.32    0.26
   2   4  11    0.09    0.01
   3   4  11    3.67    0.08
   4   4  11    0.57    0.03
   5   4  11    0.04    0.01
   6   4  11   11.13    0.43
  -7   5  11    0.14    0.02
  -6   5  11    3.99    0.14
  -5   5  11   11.80    0.35
  -4   5  11    3.49    0.13
  -3   5  11   55.17    1.62
  -2   5  11    0.73    0.04
  -1   5  11   29.55    1.20
   0   5  11   19.32    0.46
   1   5  11    0.80    0.04
   2   5  11    1.39    0.04
   3   5  11   82.63    1.53
   4   5  11    0.09    0.01
   5   5  11    5.19    0.12
  -7   6  11    0.69    0.05
  -6   6  11    2.59    0.09
  -5   6  11    4.12    0.14
  -4   6  11    0.12    0.02
  -3   6  11   26.37    0.60
  -2   6  11   22.15    0.45
  -1   6  11   28.39    0.56
   0   6  11   58.93    1.23
   1   6  11   18.44    0.37
   2   6  11    8.71    0.16
   3   6  11   18.48    0.33
   4   6  11    0.16    0.01
   5   6  11   12.74    0.33
  -6   7  11    0.81    0.04
  -5   7  11    0.23    0.02
  -4   7  11    2.71    0.08
  -3   7  11    3.22    0.08
  -2   7  11    0.88    0.04
  -1   7  11    7.04    0.15
   0   7  11   23.77    0.46
   1   7  11    0.88    0.03
   2   7  11   46.98    0.80
   3   7  11    6.49    0.12
   4   7  11   14.95    0.28
   5   7  11    0.94    0.05
  -5   8  11    0.44    0.03
  -4   8  11    0.36    0.02
  -3   8  11    0.86    0.03
  -2   8  11   10.44    0.21
  -1   8  11    1.26    0.04
   0   8  11    1.34    0.04
   1   8  11    0.05    0.01
   2   8  11    1.51    0.04
   3   8  11    0.51    0.02
   4   8  11    0.94    0.03
  -5   9  11    7.53    0.23
  -4   9  11    0.42    0.03
  -3   9  11    0.26    0.02
  -2   9  11    2.58    0.06
  -1   9  11    3.63    0.08
   0   9  11   13.06    0.26
   1   9  11    1.53    0.04
   2   9  11    0.48    0.02
   3   9  11    3.20    0.10
  -4  10  11    0.84    0.04
  -3  10  11    3.17    0.08
  -2  10  11    6.03    0.14
  -1  10  11    0.05    0.01
   0  10  11    6.28    0.13
   1  10  11    0.01    0.01
   2  10  11    0.01    0.01
  -2  11  11    0.01    0.01
  -1  11  11    1.53    0.05
   0  11  11    0.13    0.01
   1  11  11    2.21    0.10
  -3 -10  12    2.38    0.08
  -2 -10  12    0.10    0.01
  -1 -10  12    0.04    0.02
   0 -10  12    6.70    0.19
   1 -10  12    1.53    0.05
   2 -10  12    0.05    0.01
  -4  -9  12    1.20    0.07
  -3  -9  12    1.14    0.04
  -2  -9  12    0.86    0.04
  -1  -9  12    0.06    0.02
   0  -9  12    0.14    0.02
   1  -9  12    0.18    0.02
   2  -9  12    3.67    0.11
   3  -9  12    0.15    0.02
  -5  -8  12    0.02    0.02
  -4  -8  12    0.01    0.01
  -3  -8  12    3.74    0.09
  -2  -8  12    0.02    0.01
  -1  -8  12    7.23    0.15
   0  -8  12    0.01    0.01
   1  -8  12    1.62    0.05
   2  -8  12    5.92    0.15
   3  -8  12    2.50    0.11
   4  -8  12   12.57    0.47
  -5  -7  12    0.03    0.02
  -4  -7  12    0.04    0.01
  -3  -7  12    1.25    0.04
  -2  -7  12    0.08    0.01
  -1  -7  12    0.10    0.01
   0  -7  12    3.51    0.07
   1  -7  12    2.30    0.05
   2  -7  12    9.56    0.20
   3  -7  12   15.66    0.35
   4  -7  12    2.95    0.13
  -6  -6  12    1.26    0.07
  -5  -6  12    7.41    0.16
  -4  -6  12    8.87    0.19
  -3  -6  12   15.60    0.32
  -2  -6  12    5.27    0.10
  -1  -6  12   15.13    0.27
   0  -6  12   78.27    1.33
   1  -6  12    9.63    0.18
   2  -6  12    0.77    0.03
   3  -6  12    0.70    0.03
   4  -6  12    0.07    0.01
  -6  -5  12    0.17    0.02
  -5  -5  12    1.31    0.04
  -4  -5  12    0.71    0.03
  -3  -5  12    0.90    0.03
  -2  -5  12   16.27    0.29
  -1  -5  12    5.39    0.14
   0  -5  12   19.06    0.43
   1  -5  12    9.24    0.19
   2  -5  12    7.37    0.16
   3  -5  12    1.71    0.05
   4  -5  12    4.23    0.11
   5  -5  12    0.69    0.05
  -7  -4  12    9.01    0.35
  -6  -4  12    1.56    0.04
  -5  -4  12   22.62    0.46
  -4  -4  12    1.73    0.05
  -3  -4  12   21.53    0.50
  -2  -4  12   22.95    0.54
  -1  -4  12    4.83    0.16
   0  -4  12   28.69    0.79
   1  -4  12    0.11    0.02
   2  -4  12    2.98    0.07
   3  -4  12   18.12    0.33
   4  -4  12    0.02    0.01
   5  -4  12    0.73    0.06
  -7  -3  12   30.54    0.87
  -6  -3  12    2.35    0.06
  -5  -3  12    0.87    0.03
  -4  -3  12   19.52    0.39
  -3  -3  12    0.37    0.03
  -2  -3  12   24.26    0.68
  -1  -3  12    2.43    0.08
   0  -3  12    4.77    0.14
   1  -3  12    0.04    0.02
   2  -3  12    0.75    0.03
   3  -3  12    1.12    0.04
   4  -3  12    0.02    0.01
   5  -3  12   12.64    0.36
  -7  -2  12   18.33    0.42
  -6  -2  12   10.97    0.23
  -5  -2  12   47.32    0.93
  -4  -2  12    0.04    0.01
  -3  -2  12   57.60    1.63
  -2  -2  12    4.70    0.13
  -1  -2  12   20.56    0.52
   0  -2  12    1.21    0.05
   1  -2  12   16.58    0.42
   2  -2  12    9.05    0.19
   3  -2  12    7.03    0.16
   4  -2  12    1.19    0.05
   5  -2  12    1.04    0.03
  -7  -1  12    0.11    0.02
  -6  -1  12    0.01    0.02
  -5  -1  12    8.28    0.17
  -4  -1  12    0.41    0.04
  -3  -1  12    3.85    0.19
  -2  -1  12    9.03    0.31
  -1  -1  12   26.42    1.13
   0  -1  12   18.89    0.79
   1  -1  12   14.68    0.40
   2  -1  12    6.18    0.16
   3  -1  12    1.25    0.05
   4  -1  12    0.46    0.02
   5  -1  12   11.81    0.24
  -8   0  12    3.11    0.12
  -7   0  12    0.23    0.02
  -6   0  12   24.46    0.45
  -5   0  12    0.46    0.03
  -4   0  12    0.06    0.02
  -3   0  12   42.41    1.74
  -2   0  12   11.67    0.39
   1   0  12   48.79    1.59
   2   0  12    0.09    0.02
   3   0  12   21.32    0.41
   4   0  12   54.52    0.93
   5   0  12   35.19    0.60
  -7   1  12    0.09    0.02
  -6   1  12    0.02    0.02
  -5   1  12    8.05    0.16
  -4   1  12    0.34    0.03
   1   1  12   15.77    0.51
   2   1  12    6.45    0.15
   3   1  12    1.19    0.04
   4   1  12    0.47    0.02
   5   1  12   12.10    0.23
   6   1  12    0.00    0.01
  -7   2  12   18.22    0.42
  -6   2  12   10.98    0.26
  -5   2  12   46.50    0.93
  -4   2  12    0.02    0.02
  -3   2  12   52.83    2.33
   1   2  12   15.52    0.45
   2   2  12    9.09    0.18
   3   2  12    7.02    0.14
   4   2  12    1.26    0.04
   5   2  12    1.07    0.03
  -7   3  12   31.60    0.72
  -6   3  12    2.35    0.07
  -5   3  12    0.82    0.04
  -4   3  12   19.39    0.46
  -3   3  12    0.33    0.05
   0   3  12    4.35    0.19
   1   3  12   -0.01    0.01
   2   3  12    0.80    0.03
   3   3  12    1.16    0.04
   4   3  12    0.02    0.01
   5   3  12   13.10    0.25
  -7   4  12    9.38    0.26
  -6   4  12    1.58    0.05
  -5   4  12   24.29    0.69
  -4   4  12    1.76    0.06
  -3   4  12   20.61    0.62
   0   4  12   25.78    0.61
   1   4  12    0.13    0.02
   2   4  12    2.91    0.07
   3   4  12   18.76    0.36
   4   4  12    0.01    0.01
   5   4  12    0.72    0.03
  -7   5  12    0.64    0.05
  -6   5  12    0.20    0.03
  -5   5  12    1.37    0.07
  -4   5  12    0.68    0.05
  -3   5  12    0.91    0.06
  -2   5  12   15.42    0.46
  -1   5  12    5.31    0.13
   0   5  12   18.15    0.37
   1   5  12    9.17    0.19
   2   5  12    7.29    0.15
   3   5  12    1.68    0.05
   4   5  12    4.39    0.09
   5   5  12    0.75    0.03
  -6   6  12    1.36    0.06
  -5   6  12    7.62    0.24
  -4   6  12    9.45    0.29
  -3   6  12   15.41    0.37
  -2   6  12    5.12    0.12
  -1   6  12   15.06    0.30
   0   6  12   76.18    1.48
   1   6  12    9.52    0.20
   2   6  12    0.75    0.03
   3   6  12    0.66    0.02
   4   6  12    0.04    0.01
   5   6  12    5.86    0.23
  -6   7  12    1.03    0.04
  -5   7  12    0.02    0.02
  -4   7  12    0.04    0.02
  -3   7  12    1.32    0.05
  -2   7  12    0.04    0.01
  -1   7  12    0.10    0.01
   0   7  12    3.45    0.08
   1   7  12    2.38    0.06
   2   7  12    9.68    0.20
   3   7  12   15.93    0.28
   4   7  12    3.26    0.08
  -5   8  12    0.04    0.02
  -4   8  12    0.01    0.01
  -3   8  12    3.82    0.09
  -2   8  12    0.02    0.01
  -1   8  12    7.39    0.15
   0   8  12    0.01    0.01
   1   8  12    1.73    0.05
   2   8  12    6.29    0.13
   3   8  12    2.44    0.06
  -4   9  12    1.26    0.04
  -3   9  12    1.09    0.03
  -2   9  12    1.00    0.04
  -1   9  12    0.04    0.01
   0   9  12    0.14    0.01
   1   9  12    0.17    0.01
   2   9  12    3.63    0.16
   3   9  12    0.19    0.02
  -3  10  12    2.56    0.11
  -2  10  12    0.10    0.01
  -1  10  12    0.02    0.01
   0  10  12    7.13    0.20
   1  10  12    1.60    0.08
   2  10  12    0.04    0.01
  -2 -10  13    1.96    0.09
  -1 -10  13    0.22    0.03
   0 -10  13    3.85    0.11
  -3  -9  13    3.70    0.11
  -2  -9  13    2.97    0.09
  -1  -9  13    0.18    0.02
   0  -9  13    1.20    0.04
   1  -9  13    0.22    0.02
   2  -9  13    4.84    0.19
  -4  -8  13    1.86    0.06
  -3  -8  13    0.07    0.01
  -2  -8  13    1.42    0.04
  -1  -8  13    0.19    0.02
   0  -8  13   26.43    0.53
   1  -8  13    0.03    0.01
   2  -8  13    0.30    0.03
   3  -8  13    0.32    0.03
  -5  -7  13    0.06    0.01
  -4  -7  13   11.25    0.26
  -3  -7  13    0.01    0.01
  -2  -7  13    0.71    0.03
  -1  -7  13    2.95    0.07
   0  -7  13   43.55    0.77
   1  -7  13    0.05    0.01
   2  -7  13    8.29    0.19
   3  -7  13    0.08    0.01
   4  -7  13    5.05    0.20
  -5  -6  13    0.10    0.01
  -4  -6  13    0.03    0.01
  -3  -6  13    0.56    0.03
  -2  -6  13    0.58    0.02
  -1  -6  13    0.82    0.03
   0  -6  13    4.18    0.08
   1  -6  13    6.57    0.14
   2  -6  13    0.21    0.02
   3  -6  13   11.40    0.26
   4  -6  13    2.01    0.06
  -6  -5  13    0.27    0.02
  -5  -5  13    8.85    0.19
  -4  -5  13    6.40    0.14
  -3  -5  13   24.16    0.48
  -2  -5  13    2.21    0.05
  -1  -5  13    1.01    0.03
   0  -5  13   34.49    0.59
   1  -5  13    3.84    0.09
   2  -5  13   11.33    0.23
   3  -5  13    2.53    0.06
   4  -5  13    7.12    0.21
  -6  -4  13    3.44    0.09
  -5  -4  13    1.85    0.05
  -4  -4  13    9.09    0.19
  -3  -4  13    1.22    0.04
  -2  -4  13   15.90    0.29
  -1  -4  13    0.04    0.02
   0  -4  13   25.13    0.48
   1  -4  13    1.22    0.04
   2  -4  13    5.40    0.12
   3  -4  13    0.22    0.02
   4  -4  13    4.57    0.14
  -7  -3  13    2.74    0.11
  -6  -3  13    0.09    0.02
  -5  -3  13    2.36    0.06
  -4  -3  13    6.69    0.14
  -3  -3  13    5.92    0.13
  -2  -3  13   30.83    0.88
  -1  -3  13    3.44    0.12
   0  -3  13   23.63    0.55
   1  -3  13    0.99    0.04
   2  -3  13   18.79    0.44
   3  -3  13    0.13    0.02
   4  -3  13    7.23    0.17
   5  -3  13    0.36    0.03
  -7  -2  13    1.15    0.05
  -6  -2  13   35.53    0.71
  -5  -2  13   34.88    0.69
  -4  -2  13   26.10    0.52
  -3  -2  13   27.98    0.65
  -2  -2  13    6.40    0.20
  -1  -2  13    3.63    0.12
   0  -2  13   47.23    1.34
   1  -2  13    9.81    0.23
   2  -2  13    2.92    0.07
   3  -2  13   34.28    0.77
   4  -2  13    2.87    0.08
   5  -2  13   11.58    0.33
  -7  -1  13    7.60    0.21
  -6  -1  13   11.74    0.24
  -5  -1  13    9.56    0.20
  -4  -1  13    0.06    0.02
  -3  -1  13   26.64    0.77
  -2  -1  13    2.80    0.10
  -1  -1  13   42.55    1.21
   0  -1  13    0.36    0.03
   1  -1  13   17.84    0.49
   2  -1  13    3.24    0.09
   3  -1  13    0.71    0.03
   4  -1  13   12.96    0.26
   5  -1  13    0.38    0.02
  -7   0  13   -0.01    0.01
  -6   0  13    0.02    0.02
  -5   0  13   -0.01    0.02
  -4   0  13    0.04    0.01
  -3   0  13    0.02    0.02
   1   0  13    0.07    0.02
   2   0  13    0.06    0.02
   3   0  13    0.02    0.01
   4   0  13    0.06    0.01
   5   0  13    0.00    0.01
  -7   1  13    7.06    0.17
  -6   1  13   11.60    0.24
  -5   1  13    9.83    0.23
  -4   1  13    0.05    0.02
  -3   1  13   24.86    1.10
   1   1  13   17.59    0.50
   2   1  13    3.29    0.09
   3   1  13    0.73    0.03
   4   1  13   12.59    0.30
   5   1  13    0.45    0.03
  -7   2  13    1.04    0.04
  -6   2  13   36.46    0.83
  -5   2  13   34.29    0.69
  -4   2  13   25.82    0.75
  -3   2  13   25.44    1.16
   1   2  13    9.30    0.27
   2   2  13    2.94    0.07
   3   2  13   34.10    0.65
   4   2  13    2.90    0.07
   5   2  13   12.01    0.32
  -7   3  13    2.64    0.08
  -6   3  13    0.10    0.02
  -5   3  13    2.39    0.08
  -4   3  13    6.64    0.17
  -3   3  13    5.49    0.19
   1   3  13    0.91    0.04
   2   3  13   18.69    0.36
   3   3  13    0.11    0.01
   4   3  13    7.32    0.15
   5   3  13    0.41    0.04
  -7   4  13    1.38    0.07
  -6   4  13    3.51    0.12
  -5   4  13    1.90    0.08
  -4   4  13    9.23    0.29
  -3   4  13    1.19    0.06
  -2   4  13   14.91    0.65
   0   4  13   23.59    0.55
   1   4  13    1.18    0.04
   2   4  13    5.30    0.11
   3   4  13    0.26    0.02
   4   4  13    4.88    0.10
   5   4  13    0.04    0.01
  -6   5  13    0.29    0.03
  -5   5  13    9.38    0.28
  -4   5  13    6.61    0.21
  -3   5  13   23.71    0.71
  -2   5  13    1.99    0.12
  -1   5  13    0.98    0.04
   0   5  13   32.68    0.65
   1   5  13    3.70    0.10
   2   5  13   10.95    0.22
   3   5  13    2.51    0.06
   4   5  13    7.46    0.17
  -6   6  13    1.93    0.11
  -5   6  13    0.09    0.02
  -4   6  13    0.04    0.02
  -3   6  13    0.55    0.05
  -2   6  13    0.58    0.04
  -1   6  13    0.89    0.04
   0   6  13    3.97    0.09
   1   6  13    6.48    0.14
   2   6  13    0.24    0.02
   3   6  13   11.52    0.23
   4   6  13    2.21    0.07
  -5   7  13    0.04    0.02
  -4   7  13   11.69    0.35
  -3   7  13    0.02    0.01
  -2   7  13    0.77    0.03
  -1   7  13    2.90    0.08
   0   7  13   43.09    0.83
   1   7  13    0.08    0.01
   2   7  13    8.01    0.17
   3   7  13    0.09    0.01
  -5   8  13    0.72    0.05
  -4   8  13    1.92    0.06
  -3   8  13    0.06    0.01
  -2   8  13    1.46    0.05
  -1   8  13    0.18    0.02
   0   8  13   27.30    0.52
   1   8  13    0.04    0.01
   2   8  13    0.30    0.02
   3   8  13    0.30    0.02
  -4   9  13    0.30    0.03
  -3   9  13    3.67    0.10
  -2   9  13    3.04    0.09
  -1   9  13    0.17    0.02
   0   9  13    1.12    0.04
   1   9  13    0.19    0.02
   2   9  13    4.75    0.14
  -2  10  13    2.01    0.09
  -1  10  13    0.23    0.02
   0  10  13    4.00    0.16
   1  10  13    0.19    0.03
  -3  -9  14    8.87    0.34
  -2  -9  14    0.12    0.01
  -1  -9  14    0.41    0.02
   0  -9  14    0.73    0.03
   1  -9  14    0.54    0.03
  -4  -8  14    0.05    0.01
  -3  -8  14    1.38    0.04
  -2  -8  14   11.83    0.32
  -1  -8  14    0.41    0.03
   0  -8  14   13.00    0.29
   1  -8  14    0.03    0.01
   2  -8  14    0.24    0.03
  -5  -7  14    1.25    0.06
  -4  -7  14    0.08    0.01
  -3  -7  14    3.34    0.08
  -2  -7  14    0.02    0.01
  -1  -7  14   17.22    0.33
   0  -7  14   10.81    0.22
   1  -7  14    1.05    0.03
   2  -7  14    0.69    0.03
   3  -7  14    3.19    0.13
  -5  -6  14    4.34    0.11
  -4  -6  14    0.55    0.03
  -3  -6  14    0.64    0.03
  -2  -6  14    2.40    0.06
  -1  -6  14   56.84    1.08
   0  -6  14    5.33    0.10
   1  -6  14    8.77    0.18
   2  -6  14    3.78    0.09
   3  -6  14    6.58    0.15
  -6  -5  14    2.35    0.08
  -5  -5  14    0.15    0.02
  -4  -5  14    0.11    0.01
  -3  -5  14    0.30    0.02
  -2  -5  14    0.54    0.03
  -1  -5  14    0.43    0.02
   0  -5  14    0.08    0.01
   1  -5  14    0.16    0.02
   2  -5  14    0.49    0.03
   3  -5  14    3.16    0.08
   4  -5  14    2.39    0.10
  -6  -4  14    0.15    0.01
  -5  -4  14    0.42    0.02
  -4  -4  14    1.62    0.05
  -3  -4  14    0.36    0.02
  -2  -4  14    1.07    0.04
  -1  -4  14   45.05    0.88
   0  -4  14    2.42    0.06
   1  -4  14   27.33    0.52
   2  -4  14    0.64    0.03
   3  -4  14    0.83    0.04
   4  -4  14    1.21    0.05
  -7  -3  14    0.05    0.02
  -6  -3  14    0.62    0.03
  -5  -3  14    3.22    0.08
  -4  -3  14    4.11    0.09
  -3  -3  14   18.14    0.36
  -2  -3  14   58.20    1.12
  -1  -3  14    7.04    0.15
   0  -3  14   28.03    0.55
   1  -3  14    1.77    0.06
   2  -3  14   48.40    1.06
   3  -3  14   26.97    0.53
   4  -3  14    5.49    0.16
  -7  -2  14    4.89    0.19
  -6  -2  14    7.37    0.17
  -5  -2  14   10.67    0.22
  -4  -2  14    8.43    0.18
  -3  -2  14    1.56    0.05
  -2  -2  14    1.16    0.04
  -1  -2  14    3.74    0.10
   0  -2  14    6.16    0.19
   1  -2  14    3.19    0.09
   2  -2  14   14.93    0.41
   3  -2  14    9.28    0.22
   4  -2  14    2.33    0.06
  -7  -1  14    0.48    0.04
  -6  -1  14    5.68    0.14
  -5  -1  14    1.39    0.04
  -4  -1  14    5.20    0.11
  -3  -1  14    7.62    0.16
  -2  -1  14    0.06    0.02
  -1  -1  14    0.38    0.05
   0  -1  14    4.17    0.19
   1  -1  14    1.62    0.07
   2  -1  14    0.21    0.02
   3  -1  14    1.61    0.05
   4  -1  14    0.14    0.02
   5  -1  14    8.30    0.32
  -7   0  14   11.46    0.44
  -6   0  14    5.26    0.13
  -5   0  14    5.51    0.13
  -4   0  14    6.88    0.15
  -3   0  14   31.84    0.72
   1   0  14    0.03    0.02
   2   0  14    4.02    0.13
   3   0  14    1.11    0.04
   4   0  14    0.19    0.02
   5   0  14    4.70    0.19
  -7   1  14    0.42    0.04
  -6   1  14    5.46    0.14
  -5   1  14    1.39    0.05
  -4   1  14    4.98    0.13
  -3   1  14    7.18    0.23
   1   1  14    1.51    0.09
   2   1  14    0.23    0.02
   3   1  14    1.65    0.05
   4   1  14    0.13    0.01
   5   1  14    8.22    0.32
  -7   2  14    4.46    0.18
  -6   2  14    7.04    0.18
  -5   2  14   10.45    0.22
  -4   2  14    8.11    0.26
  -3   2  14    1.53    0.10
   1   2  14    2.96    0.15
   2   2  14   14.35    0.33
   3   2  14    9.11    0.18
   4   2  14    2.34    0.05
   5   2  14   10.54    0.40
  -6   3  14    0.59    0.03
  -5   3  14    3.27    0.12
  -4   3  14    3.94    0.11
  -3   3  14   17.33    0.78
   1   3  14    1.62    0.06
   2   3  14   45.41    0.89
   3   3  14   27.06    0.51
   4   3  14    5.41    0.16
  -6   4  14    0.11    0.02
  -5   4  14    0.37    0.04
  -4   4  14    1.60    0.07
  -3   4  14    0.57    0.05
   1   4  14   25.40    0.59
   2   4  14    0.61    0.03
   3   4  14    0.74    0.03
   4   4  14    1.20    0.04
  -6   5  14    2.45    0.08
  -5   5  14    0.14    0.02
  -4   5  14    0.10    0.02
  -3   5  14    0.32    0.04
  -2   5  14    0.62    0.06
  -1   5  14    0.42    0.06
   0   5  14    0.05    0.02
   1   5  14    0.17    0.02
   2   5  14    0.42    0.02
   3   5  14    3.15    0.08
   4   5  14    2.43    0.07
  -5   6  14    4.36    0.14
  -4   6  14    0.54    0.04
  -3   6  14    0.56    0.04
  -2   6  14    2.35    0.08
  -1   6  14   54.23    1.22
   0   6  14    5.21    0.11
   1   6  14    8.40    0.17
   2   6  14    3.58    0.09
   3   6  14    6.58    0.18
  -5   7  14    1.22    0.08
  -4   7  14    0.10    0.02
  -3   7  14    3.16    0.11
  -2   7  14    0.02    0.01
  -1   7  14   16.30    0.38
   0   7  14   10.59    0.21
   1   7  14    1.00    0.03
   2   7  14    0.65    0.03
  -4   8  14    0.05    0.02
  -3   8  14    1.39    0.05
  -2   8  14   11.59    0.33
  -1   8  14    0.34    0.02
   0   8  14   12.92    0.29
   1   8  14    0.06    0.01
   2   8  14    0.25    0.02
  -3   9  14    8.41    0.35
  -2   9  14    0.10    0.01
  -1   9  14    0.40    0.02
   0   9  14    0.75    0.03
   1   9  14    0.64    0.04
  -1  -9  15    0.10    0.02
  -3  -8  15    6.48    0.18
  -2  -8  15    4.58    0.13
  -1  -8  15    4.08    0.11
   0  -8  15    6.78    0.19
   1  -8  15    0.18    0.03
  -4  -7  15    0.01    0.01
  -3  -7  15    0.81    0.03
  -2  -7  15    0.01    0.01
  -1  -7  15    3.03    0.09
   0  -7  15    2.05    0.05
   1  -7  15    0.02    0.01
   2  -7  15    0.00    0.01
  -5  -6  15    0.06    0.01
  -4  -6  15    0.76    0.03
  -3  -6  15    0.03    0.01
  -2  -6  15    0.51    0.03
  -1  -6  15   16.18    0.32
   0  -6  15    0.05    0.01
   1  -6  15    1.97    0.06
   2  -6  15    1.52    0.04
   3  -6  15    2.59    0.11
  -5  -5  15    0.08    0.01
  -4  -5  15   22.74    0.51
  -3  -5  15    9.07    0.19
  -2  -5  15    0.30    0.02
  -1  -5  15    4.37    0.10
   0  -5  15    6.23    0.13
   1  -5  15    8.94    0.18
   2  -5  15    0.91    0.03
   3  -5  15   12.84    0.35
  -6  -4  15    2.49    0.11
  -5  -4  15    2.54    0.07
  -4  -4  15    2.16    0.05
  -3  -4  15    9.62    0.20
  -2  -4  15    1.64    0.05
  -1  -4  15    5.21    0.11
   0  -4  15   10.41    0.21
   1  -4  15    1.34    0.04
   2  -4  15    0.91    0.04
   3  -4  15    0.12    0.02
  -6  -3  15    6.97    0.16
  -5  -3  15    8.35    0.20
  -4  -3  15    6.94    0.15
  -3  -3  15    3.30    0.08
  -2  -3  15    0.55    0.03
  -1  -3  15    4.80    0.12
   0  -3  15    4.72    0.10
   1  -3  15    1.11    0.04
   2  -3  15    1.68    0.05
   3  -3  15   17.86    0.48
   4  -3  15    6.15    0.24
  -6  -2  15    2.91    0.07
  -5  -2  15    4.67    0.12
  -4  -2  15    2.12    0.05
  -3  -2  15    1.93    0.05
  -2  -2  15    3.68    0.08
  -1  -2  15    4.57    0.12
   0  -2  15   10.95    0.33
   1  -2  15    7.72    0.23
   2  -2  15   25.86    0.70
   3  -2  15   17.95    0.40
   4  -2  15    1.35    0.07
  -6  -1  15    9.88    0.22
  -5  -1  15    8.93    0.21
  -4  -1  15    0.03    0.02
  -3  -1  15   11.02    0.23
  -2  -1  15    7.99    0.24
   1  -1  15    9.28    0.37
   2  -1  15    7.15    0.28
   3  -1  15   21.07    0.58
   4  -1  15    1.53    0.07
  -6   0  15    0.02    0.01
  -5   0  15    0.05    0.02
  -4   0  15    0.02    0.02
  -3   0  15    0.01    0.02
   1   0  15   -0.01    0.02
   2   0  15    0.00    0.01
   3   0  15    0.00    0.01
   4   0  15    0.03    0.02
  -6   1  15    8.97    0.28
  -5   1  15    8.52    0.21
  -4   1  15    0.07    0.02
  -3   1  15   11.29    0.49
   2   1  15    6.77    0.20
   3   1  15   21.02    0.47
   4   1  15    1.45    0.07
  -6   2  15    2.58    0.09
  -5   2  15    4.38    0.15
  -4   2  15    1.93    0.08
  -3   2  15    1.80    0.11
   2   2  15   24.67    0.70
   3   2  15   17.63    0.34
   4   2  15    1.31    0.05
  -6   3  15    6.64    0.21
  -5   3  15    7.98    0.25
  -4   3  15    6.80    0.32
  -3   3  15    3.10    0.17
   2   3  15    1.49    0.04
   3   3  15   16.76    0.33
   4   3  15    5.89    0.17
  -6   4  15    2.42    0.08
  -5   4  15    2.49    0.09
  -4   4  15    2.08    0.08
  -3   4  15    9.35    0.30
   1   4  15    1.26    0.04
   2   4  15    0.86    0.03
   3   4  15    0.12    0.01
   4   4  15    1.95    0.09
  -5   5  15    0.06    0.02
  -4   5  15   21.74    0.66
  -3   5  15    8.93    0.38
  -2   5  15    0.29    0.05
   0   5  15    5.92    0.25
   1   5  15    8.33    0.20
   2   5  15    0.84    0.03
   3   5  15   12.60    0.34
  -5   6  15    0.05    0.02
  -4   6  15    0.65    0.04
  -3   6  15    0.03    0.02
  -2   6  15    0.49    0.05
  -1   6  15   15.58    0.45
   0   6  15    0.07    0.02
   1   6  15    1.91    0.05
   2   6  15    1.49    0.07
  -4   7  15    0.01    0.02
  -3   7  15    0.79    0.06
  -2   7  15    0.00    0.01
  -1   7  15    2.81    0.09
   0   7  15    1.87    0.05
   1   7  15    0.01    0.01
   2   7  15    0.00    0.01
  -2   8  15    4.49    0.13
  -1   8  15    3.79    0.12
   0   8  15    6.73    0.19
  -2  -8  16    1.39    0.04
  -1  -8  16    0.43    0.02
  -3  -7  16    2.88    0.08
  -2  -7  16    2.81    0.08
  -1  -7  16    0.12    0.01
   0  -7  16    4.02    0.11
   1  -7  16    0.88    0.05
  -4  -6  16    0.32    0.02
  -3  -6  16    4.10    0.12
  -2  -6  16    0.26    0.02
  -1  -6  16    4.55    0.11
   0  -6  16    0.48    0.03
   1  -6  16    0.02    0.01
   2  -6  16    0.01    0.01
  -5  -5  16    1.15    0.04
  -4  -5  16    1.18    0.04
  -3  -5  16    0.02    0.01
  -2  -5  16    0.81    0.04
  -1  -5  16    1.62    0.04
   0  -5  16    7.17    0.17
   1  -5  16    0.31    0.02
   2  -5  16    0.13    0.02
  -5  -4  16    5.61    0.13
  -4  -4  16    3.25    0.08
  -3  -4  16    3.95    0.10
  -2  -4  16    8.71    0.20
  -1  -4  16    0.28    0.02
   0  -4  16   12.81    0.25
   1  -4  16    2.49    0.07
   2  -4  16    0.72    0.04
   3  -4  16    1.18    0.06
  -6  -3  16    0.49    0.03
  -5  -3  16    0.03    0.01
  -4  -3  16    2.85    0.08
  -3  -3  16    0.40    0.03
  -2  -3  16    4.32    0.11
  -1  -3  16    0.28    0.02
   0  -3  16   51.65    1.46
   1  -3  16    1.69    0.05
   2  -3  16    1.99    0.07
   3  -3  16    1.40    0.07
  -6  -2  16    2.78    0.12
  -5  -2  16    2.31    0.06
  -4  -2  16    2.66    0.07
  -3  -2  16    0.08    0.02
  -2  -2  16   16.48    0.46
  -1  -2  16    0.13    0.02
   0  -2  16    9.89    0.41
   1  -2  16    1.49    0.06
   2  -2  16    2.12    0.07
   3  -2  16    3.26    0.14
  -6  -1  16   13.32    0.30
  -5  -1  16    0.21    0.02
  -4  -1  16    0.09    0.02
  -3  -1  16    0.56    0.04
   1  -1  16    0.81    0.06
   2  -1  16    8.61    0.34
   3  -1  16    1.72    0.08
  -6   0  16    2.22    0.10
  -5   0  16   39.60    0.90
  -4   0  16    1.11    0.04
  -3   0  16    1.83    0.10
   1   0  16    0.21    0.03
   2   0  16    0.74    0.05
   3   0  16   20.16    0.77
   4   0  16    1.67    0.08
  -6   1  16   12.07    0.36
  -5   1  16    0.17    0.02
  -4   1  16    0.04    0.02
   2   1  16    8.66    0.34
   3   1  16    1.68    0.08
  -5   2  16    2.24    0.13
  -4   2  16    2.35    0.09
   2   2  16    2.11    0.07
   3   2  16    3.48    0.14
  -5   3  16    0.00    0.03
  -4   3  16    2.69    0.15
   2   3  16    2.10    0.10
   3   3  16    1.44    0.07
  -5   4  16    5.31    0.17
  -4   4  16    2.88    0.16
   2   4  16    0.69    0.04
   3   4  16    1.12    0.06
  -4   5  16    1.08    0.05
  -3   5  16    0.02    0.02
   1   5  16    0.30    0.03
   2   5  16    0.11    0.02
  -4   6  16    0.28    0.03
  -3   6  16    3.91    0.18
  -2   6  16    0.26    0.04
   0   6  16    0.45    0.04
   1   6  16    0.01    0.01
  -3   7  16    2.71    0.13
  -2   7  16    2.59    0.12
  -1   7  16    0.09    0.02
   0   7  16    3.82    0.16
  -1  -7  17    0.05    0.01
  -3  -6  17    4.87    0.14
  -2  -6  17    0.41    0.02
  -1  -6  17    0.89    0.03
   0  -6  17    0.11    0.02
  -4  -5  17    0.27    0.02
  -3  -5  17    3.10    0.09
  -2  -5  17    0.09    0.01
  -1  -5  17    1.51    0.07
   0  -5  17    2.17    0.07
   1  -5  17    0.46    0.02
  -4  -4  17    5.80    0.14
  -3  -4  17    2.10    0.07
  -2  -4  17    2.98    0.09
  -1  -4  17   11.74    0.33
   0  -4  17    1.40    0.05
   1  -4  17    0.02    0.01
   2  -4  17    2.16    0.09
  -5  -3  17    5.07    0.14
  -4  -3  17    0.94    0.03
  -3  -3  17    0.03    0.01
  -2  -3  17    0.07    0.02
  -1  -3  17    3.72    0.11
   0  -3  17    2.56    0.12
   1  -3  17    3.57    0.11
   2  -3  17    4.37    0.18
  -5  -2  17    0.24    0.02
  -4  -2  17    0.54    0.03
  -3  -2  17   29.76    0.80
  -2  -2  17    0.33    0.04
   0  -2  17    3.51    0.16
   1  -2  17    3.41    0.15
   2  -2  17    4.55    0.19
   3  -2  17    7.06    0.28
  -5  -1  17   18.74    0.43
  -4  -1  17    1.11    0.04
  -3  -1  17    2.32    0.08
   1  -1  17    0.12    0.02
   2  -1  17    0.14    0.02
   3  -1  17   13.10    0.49
  -5   0  17   -0.01    0.01
  -4   0  17   -0.02    0.02
   2   0  17    0.00    0.01
   3   0  17   -0.02    0.01
  -5   1  17   17.96    0.79
  -4   1  17    1.08    0.05
   2   1  17    0.23    0.03
   3   1  17   12.77    0.49
  -5   2  17    0.24    0.04
  -4   2  17    0.54    0.06
  -4   3  17    0.78    0.07
  -2  -5  18    0.68    0.04
  -1  -5  18    0.96    0.05
  -3  -4  18    4.15    0.12
  -2  -4  18    0.61    0.04
  -1  -4  18    3.09    0.13
  -4  -3  18    3.59    0.10
  -3  -3  18   10.21    0.28
  -2  -3  18    0.86    0.05
  -4  -2  18    0.02    0.01
  -3  -2  18    1.03    0.04
  -4  -1  18    4.21    0.12
  -4   0  18    0.70    0.05
   0   0   0    0.00    0.00

;
